# Supplementary material for: Oxidative trifluoromethylation and fluoroolefination of unactivated olefins
Source: Royal Society of Chemistry journal article supplement (doi:10.1039/c6cc08178a), 2016-01-01
Supplement: c6cc08178a1.pdf [file c6cc08178a1.pdf]

# **Oxidative trifluoromethylation and difluoromethylation of unactivated olefins**

Ye-bin Wu <sup>a</sup>, Guo-ping Lu <sup>a</sup>, Tao Yuan <sup>a</sup>, Zhu-bing Xu <sup>a</sup>, Li Wan <sup>c</sup>, and Chun Cai<sup>\*a,b</sup>

<sup>a</sup> Chemical Engineering college, Nanjing University of Science and Technology, 200 Xiao Ling Wei Street, Nanjing, Jiangsu, People's Republic of China

<sup>b</sup> Key Laboratory of Organofluorine Chemistry, Shanghai Institute of Organic Chemistry, Chinese Academy of Sciences, 345 Lingling Lu, Shanghai 20032.

<sup>c</sup> Biotechnology and Pharmaceutical Engineering College, Nanjing Tech University, Nanjing 211816, People's Republic of China

\* Corresponding Author E-mail: [c.cai@njust.edu.cn](mailto:c.cai@njust.edu.cn)

|                                 |           |
|---------------------------------|-----------|
| <b>1. General information</b>   | <b>2</b>  |
| <b>2. General procedure</b>     | <b>2</b>  |
| <b>3. Characterization data</b> | <b>5</b>  |
| <b>4. NMR spectra</b>           | <b>12</b> |

## 1. General information

All chemical reagents are obtained from commercial suppliers and used without further purification. All unknown compounds are characterized by  $^1\text{H}$  NMR,  $^{13}\text{C}$  NMR, MS and elemental analyses. Analytical thin-layer chromatography is performed on glass plates precoated with silica gel impregnated with a fluorescent indicator (254 nm), and the plates are visualized by exposure to ultraviolet light. Mass spectra are taken on a Thermo Scientific ISQ LT GC-MS instrument in the electron ionization (EI) mode.  $^1\text{H}$  NMR,  $^{13}\text{C}$  NMR and  $^{19}\text{F}$  NMR spectra are recorded on an AVANCE 500 Bruker spectrometer operating at 500 MHz, 125 MHz and 470 MHz in  $\text{CDCl}_3$ , respectively, and chemical shifts are reported in ppm. GC analyses are performed on an Agilent 7890A instrument (Column: Agilent 19091J-413:30 m  $\times$  320  $\mu\text{m}$   $\times$  0.25  $\mu\text{m}$ , H, FID detection). GC-MS data was recorded on a 5975C Mass Selective Detector, coupled with a 7890A Gas Chromatograph (Agilent Technologies). High-resolution mass spectra data were obtained on Agilent mass spectrometer using ESI-TOF (electrospray ionization-time of flight) and Waters Micromass GCT Premier spectrometer (electrospray ionization: EI).

## 2. General procedure

**General procedure for the preparation of olefins from corresponding aldehydes by Wittig reaction:** Compounds **1** were prepared according to literature.<sup>1</sup> A benzaldehyde derivative (5 mmol) was added to potassium carbonate (1.1 g, 8 mmol) and methyltriphenylphosphonium bromide (2.1 g, 6 mmol) in anhydrous 1,4-dioxane (5 mL) and heated at reflux for 16 h. The reaction mixture was then cooled, filtered and washed with pentane and then concentrated in vacuo.

Two methods of isolation can be used:

1. The residue was dissolved in hot pentane, cooled to 0 °C, filtered (to remove triphenylphosphine oxide: sparingly soluble in cold pentane) and washed with cold pentane. The filtrate was dried ( $\text{MgSO}_4$ ) and concentrated in vacuo to give the styrene derivative.
2. Isolate via silica gel column chromatography in 40% EtOAc/pentane (ensuring dioxane is removed prior to isolation). All styrene derivatives were then vacuum distilled (may require gentle heating) and degassed before transferring to the glove box.

**General procedure for trifluoromethylation of styrenes:** A 50 mL oven-dried Schlenk tube with a magnetic stirring bar was equipped with AgF (0.375 mmol), sealed with a septum, and degassed by alternating vacuum evacuation and oxygen backfill (three times). A solution of the olefin (0.25 mmol) and  $\text{TMSCF}_3$  (0.25 mmol) in 1 mL anhydrous DMF was added immediately via syringe. Then another 0.25 mmol  $\text{TMSCF}_3$  was added by syringe after 1 h. The mixture was stirred at room temperature for 2 h. Upon completion, the reaction mixture was diluted with  $\text{Et}_2\text{O}$  and filtered through a celite pad.  $\text{Et}_2\text{O}$  (20 mL) were added. The organic layer was washed

with water (3 × 5 ml). The combined organic layer was dried over MgSO<sub>4</sub>, filtered and concentrated in vacuum. The residue was purified by flash chromatography using petrol ether/ethyl acetate as the eluent. The conditions for chromatography and data for characterization of the products are given below.

**General procedure for difluoromethylation of styrenes:** A 50 mL oven-dried Schlenk tube with a magnetic stirring bar was equipped with AgF (0.375 mmol), sealed with a septum, and degassed by alternating vacuum evacuation and oxygen backfill (three times). A solution of the olefin (0.25 mmol) and TMSCF<sub>2</sub>R (0.25 mmol, R=CF<sub>2</sub>COOEt or CF<sub>3</sub>) in 1 mL anhydrous DMF was added immediately via syringe. Then another 0.25 mmol TMSCF<sub>2</sub>R was added by syringe after 2 h. The mixture was stirred at room temperature for 4 h. Upon completion, the reaction mixture was diluted with ethyl acetate and filtered through a celite pad. Ethyl acetate (20 mL) were added. The organic layer was washed with water (3 × 5 ml). The combined organic layer was dried over MgSO<sub>4</sub>, filtered and concentrated in vacuum. The residue was purified by flash chromatography using petrol ether/ethyl acetate as the eluent. The conditions for chromatography and data for characterization of the products are given below.

### The procedures of control experiments

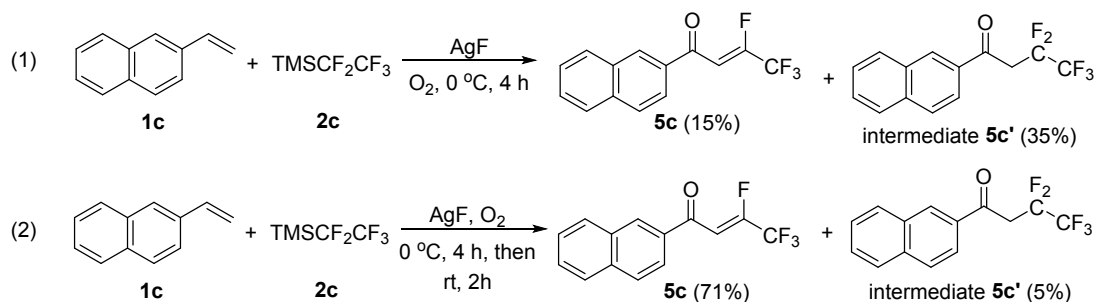

**Scheme S1** Control experiments

**Equation 1:** A 50 mL oven-dried Schlenk tube with a magnetic stirring bar was equipped with AgF (0.75 mmol), sealed with a septum, and degassed by alternating vacuum evacuation and oxygen backfill (three times). A solution of 2-Vinylnaphthalene (0.5 mmol) in 2 mL anhydrous DMF was added via syringe. To the resulting suspension, which was precooled to 0 °C was added TMSCF<sub>2</sub>CF<sub>3</sub> (0.5 mmol) by syringe. Then another 0.5 mmol TMSCF<sub>2</sub>CF<sub>3</sub> was added by syringe after 2 h. The mixture was stirred at 0 °C for 4 h. This procedure was monitored by GC-MS.

**Equation 2:** A 50 mL oven-dried Schlenk tube with a magnetic stirring bar was equipped with AgF (0.75 mmol), sealed with a septum, and degassed by alternating vacuum evacuation and oxygen backfill (three times). A solution of 2-Vinylnaphthalene (0.5 mmol) in 2 mL anhydrous DMF was added via syringe. To the resulting suspension, which was precooled to 0 °C was added TMSCF<sub>2</sub>CF<sub>3</sub> (0.5 mmol) by syringe. Then another 0.5 mmol TMSCF<sub>2</sub>CF<sub>3</sub> was added by syringe after 2 h. The mixture was stirred at 0 °C for 4 h. Then the mixture was allowed to warm up to room

temperature and stirring was continued for an additional 2 h. This procedure was monitored by GC-MS.

Oxidative perfluoromethylated intermediate **5c'** was generated in a 35% yield at 0 °C, comparing with a 5% yield when the reaction was warmed up to room temperature. Upon completion, the reaction mixture (equation 1) was diluted with ethyl acetate and filtered through a celite pad. Ethyl acetate (20 mL) were added. The organic layer was washed with water (3 × 10 ml). The combined organic layer was dried over MgSO<sub>4</sub>, filtered and concentrated in vacuum. The residue was purified by flash chromatography. We found intermediate **5c'** and product **5c** were hard to separate. The mixture of **5c'** and **5c** was detected by <sup>1</sup>H NMR and <sup>19</sup>F NMR.

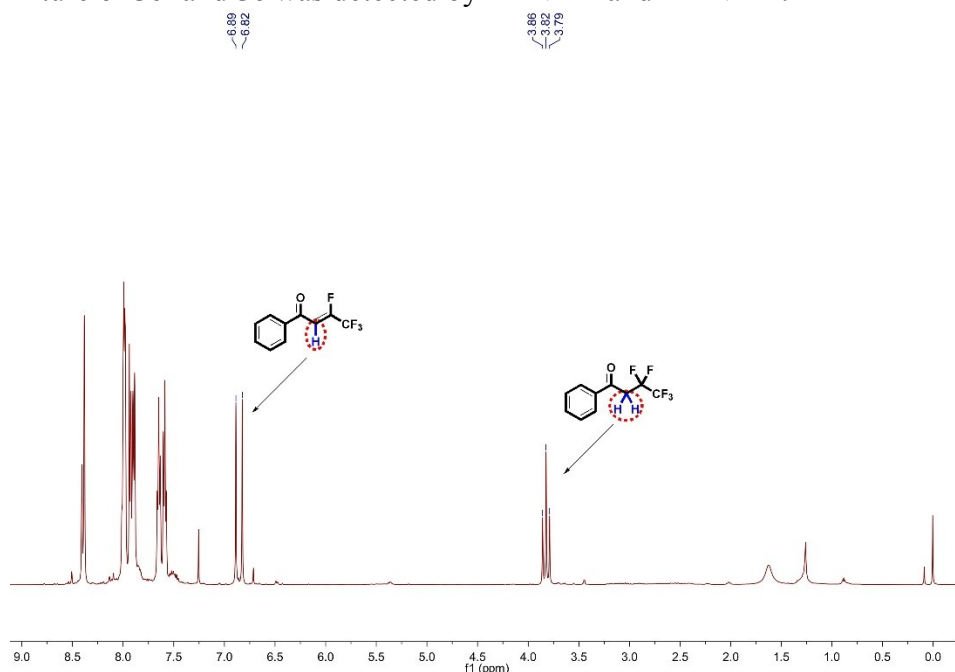

**Figure S1** <sup>1</sup>H NMR of the mixture

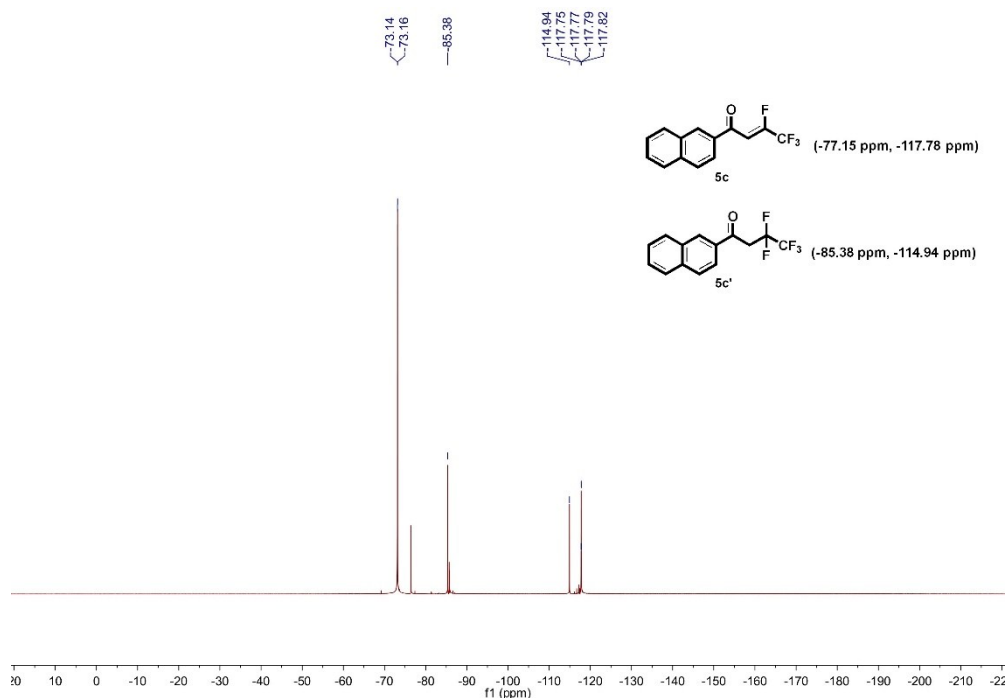

Figure S2  $^{19}\text{F}$  NMR of the mixture

### 3. Characterization data

#### 3,3,3-trifluoro-1-phenylpropan-1-one (3a)<sup>2</sup>

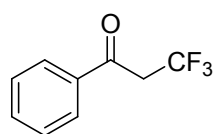

The title compound was isolated as a white solid after chromatography on silica with a Combiflash system (100:0-99:1 petrol ether/ethyl acetate). Yield: 89%.  $^1\text{H}$  NMR (500 MHz,  $\text{CDCl}_3$ )  $\delta$  7.95 (d,  $J = 7.8$  Hz, 2H), 7.65 (t,  $J = 7.4$  Hz, 1H), 7.52 (t,  $J = 7.7$  Hz, 2H), 3.81 (q,  $J = 10.0$  Hz, 2H).  $^{13}\text{C}$  NMR (126 MHz,  $\text{CDCl}_3$ )  $\delta$  189.87 (s), 135.94 (s), 134.34 (s), 129.08 (s), 128.48 (s), 124.15 (q,  $J = 277.8$  Hz), 42.22 (q,  $J = 27.7$  Hz).  $^{19}\text{F}$  NMR (470 MHz,  $\text{CDCl}_3$ )  $\delta$  -62.17 (s).

#### 1-(4-bromophenyl)-3,3,3-trifluoropropan-1-one (3b)<sup>2</sup>

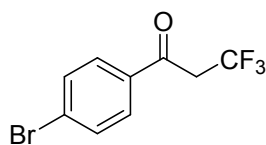

The title compound was isolated as a slightly yellow solid after chromatography on silica with a Combiflash system (100:0-99:1 petrol ether/ethyl acetate). Yield: 83%.  $^1\text{H}$  NMR (500 MHz,  $\text{CDCl}_3$ )  $\delta$  7.79 (d,  $J = 8.6$  Hz, 2H), 7.65 (d,  $J = 8.6$  Hz, 2H), 3.77 (q,  $J = 9.9$  Hz, 2H).  $^{13}\text{C}$  NMR (126 MHz,  $\text{CDCl}_3$ )  $\delta$  188.94 (s), 134.62 (s), 132.44 (s), 129.93 (s), 129.78 (s), 123.96 (q,  $J = 277.2$  Hz), 42.22 (q,  $J = 28.1$  Hz).  $^{19}\text{F}$  NMR (470 MHz,  $\text{CDCl}_3$ )  $\delta$  -61.98 (s).

#### 1-(4-chlorophenyl)-3,3,3-trifluoropropan-1-one (3c)<sup>2</sup>

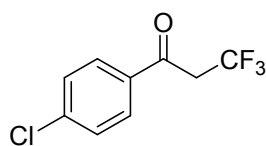

The title compound was isolated as a white solid after chromatography on silica with a Combiflash system (100:0-99:1 petrol ether/ethyl acetate). Yield: 77%.  $^1\text{H}$  NMR (500 MHz,  $\text{CDCl}_3$ )  $\delta$  7.88 (d,  $J = 8.6$  Hz, 2H), 7.49 (d,  $J = 8.6$  Hz, 2H), 3.78 (q,  $J = 9.9$  Hz, 2H).  $^{13}\text{C}$  NMR (126 MHz,  $\text{CDCl}_3$ )  $\delta$  188.70 (s), 141.03 (s), 134.24 (s), 129.89 (s), 129.45 (s), 123.96 (q,  $J = 278.0$  Hz), 42.27 (q,  $J = 28.5$  Hz).  $^{19}\text{F}$  NMR (470 MHz,  $\text{CDCl}_3$ )  $\delta$  -61.96 (s).

### 3,3,3-trifluoro-1-(4-fluorophenyl)propan-1-one (3d) <sup>2</sup>

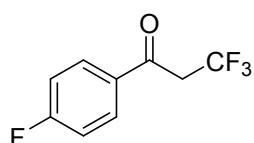

The title compound was isolated as a colorless liquid after chromatography on silica with a Combiflash system (100:0-99:1 petrol ether/ethyl acetate). Yield: 85%. <sup>1</sup>H NMR (500 MHz, CDCl<sub>3</sub>) δ 7.99 – 7.96 (m, 2H), 7.19 (t, *J* = 8.5 Hz, 2H), 3.78 (q, *J* = 9.9 Hz, 2H). <sup>13</sup>C NMR (126 MHz, CDCl<sub>3</sub>) δ 188.28 (s), 166.49 (d, *J* = 258.3 Hz), 132.41 (s), 131.29 (d, *J* = 9.1 Hz), 124.00 (q, *J* = 277.2 Hz), 116.31 (d, *J* = 21.4 Hz), 42.24 (q, *J* = 28.5 Hz). <sup>19</sup>F NMR (470 MHz, CDCl<sub>3</sub>) δ -61.96 (s), -102.81 (s).

### 3,3,3-trifluoro-1-(p-tolyl)propan-1-one (3e) <sup>2</sup>

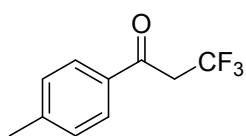

The title compound was isolated as a white solid after chromatography on silica with a Combiflash system (100:0-99:1 petrol ether/ethyl acetate). Yield: 87%. <sup>1</sup>H NMR (500 MHz, CDCl<sub>3</sub>) δ 7.84 (d, *J* = 8.1 Hz, 2H), 7.31 (d, *J* = 8.0 Hz, 2H), 3.77 (q, *J* = 10.1 Hz, 2H), 2.44 (s, 3H). <sup>13</sup>C NMR (126 MHz, CDCl<sub>3</sub>) δ 189.44 (s), 145.42 (s), 133.58 (s), 129.73 (s), 128.64 (s), 124.19 (q, *J* = 276.2 Hz), 42.13 (q, *J* = 27.5 Hz), 21.82 (s). <sup>19</sup>F NMR (470 MHz, CDCl<sub>3</sub>) δ -61.98 (s).

### 1-(4-(tert-butyl)phenyl)-3,3,3-trifluoropropan-1-one (3f) <sup>3</sup>

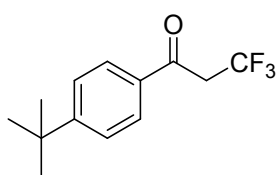

The title compound was isolated as a slightly yellow liquid after chromatography on silica with a Combiflash system (100:0-99:1 petrol ether/ethyl acetate). Yield: 86%. <sup>1</sup>H NMR (500 MHz, CDCl<sub>3</sub>) δ 7.89 (d, *J* = 8.5 Hz, 2H), 7.53 (d, *J* = 8.5 Hz, 2H), 3.78 (q, *J* = 10.1 Hz, 2H), 1.36 (s, 9H). <sup>13</sup>C NMR (126 MHz, CDCl<sub>3</sub>) δ 189.43 (s), 158.33 (s), 133.46 (s), 128.52 (s), 126.02 (s), 124.22 (q, *J* = 275.0 Hz), 42.12 (q, *J* = 27.5 Hz), 35.37 (s), 31.11 (s). <sup>19</sup>F NMR (470 MHz, CDCl<sub>3</sub>) δ -61.95 (s).

### 3,3,3-trifluoro-1-(4-methoxyphenyl)propan-1-one (3g) <sup>2</sup>

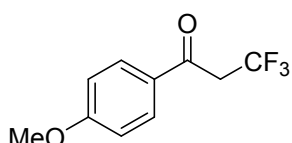

The title compound was isolated as a yellow solid after chromatography on silica with a Combiflash system (100:0-96:4 petrol ether/ethyl acetate). Yield: 75%. <sup>1</sup>H NMR (500 MHz, CDCl<sub>3</sub>) δ 7.91 (d, *J* = 8.4 Hz, 2H), 6.97 (d, *J* = 8.4 Hz, 2H), 3.89 (s, 3H), 3.74 (q, *J* = 10.1 Hz, 2H). <sup>13</sup>C NMR (126 MHz, CDCl<sub>3</sub>) δ 188.28 (s), 164.49 (s), 140.67 (s), 130.94 (s), 124.26 (q, *J* = 275.6 Hz), 114.23 (s), 55.69 (s), 41.93 (q, *J* = 27.5 Hz). <sup>19</sup>F NMR (470 MHz, CDCl<sub>3</sub>) δ -61.94 (s).

### 4-(3,3,3-trifluoropropanoyl)phenyl acetate (3h) <sup>4</sup>

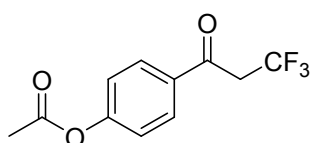

The title compound was isolated as a white solid after chromatography on silica with a Combiflash system (100:0-93:7 petrol ether/ethyl acetate). Yield: 90%. <sup>1</sup>H NMR (500 MHz, CDCl<sub>3</sub>) δ 7.97 (d, *J* = 8.7 Hz, 2H), 7.24 (d, *J* = 8.8 Hz, 2H), 3.78 (q, *J* = 10.0 Hz, 2H), 2.33 (s, 3H). <sup>13</sup>C NMR (126 MHz, CDCl<sub>3</sub>) δ 188.64 (s), 168.81 (s), 155.31 (s), 133.44 (s), 130.18 (s), 124.00 (q, *J* = 277.6 Hz), 122.31 (s), 42.21 (q, *J* = 28.5 Hz), 21.23 (s). <sup>19</sup>F NMR (470 MHz, CDCl<sub>3</sub>) δ -61.97 (s).

### 3,3,3-trifluoro-1-(4-nitrophenyl)propan-1-one (3i) <sup>2</sup>

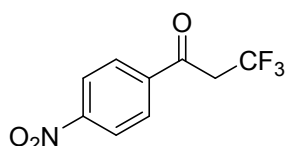

The title compound was isolated as a slightly yellow solid after chromatography on silica with a Combiflash system (100:0-95:5 petrol ether/ethyl acetate). Yield: 70%. <sup>1</sup>H NMR (500 MHz, CDCl<sub>3</sub>) δ 8.37 (d, *J* = 8.8 Hz, 2H), 8.12 (d, *J* = 8.8 Hz, 2H), 3.87 (q, *J* = 9.7 Hz, 2H). <sup>13</sup>C NMR (126 MHz, CDCl<sub>3</sub>) δ 188.49 (s), 151.07 (s), 140.08 (s), 129.61 (s), 124.31 (s), 123.65 (q, *J* = 277.6 Hz), 42.85 (q, *J* = 29.0 Hz). <sup>19</sup>F NMR (470 MHz, CDCl<sub>3</sub>) δ -61.92 (s).

### 4-(3,3,3-trifluoropropanoyl)benzotrile (3j) <sup>2</sup>

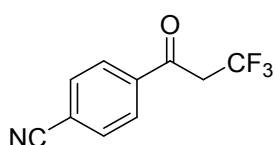

The title compound was isolated as a slightly yellow liquid after chromatography on silica with a Combiflash system (100:0-96:4 petrol ether/ethyl acetate). Yield: 79%. <sup>1</sup>H NMR (500 MHz, CDCl<sub>3</sub>) δ 8.04 (d, *J* = 8.4 Hz, 2H), 7.84 (d, *J* = 8.5 Hz, 2H), 3.83 (q, *J* = 9.7 Hz, 2H). <sup>13</sup>C NMR (126 MHz, CDCl<sub>3</sub>) δ 188.66 (s), 138.66 (s), 132.94 (s), 128.91 (s), 123.70 (q, *J* = 277.5 Hz), 117.67 (s), 42.61 (q, *J* = 29.0 Hz). <sup>19</sup>F NMR (470 MHz, CDCl<sub>3</sub>) δ -61.92 (s).

### 1-(3-bromophenyl)-3,3,3-trifluoropropan-1-one (3k) <sup>5</sup>

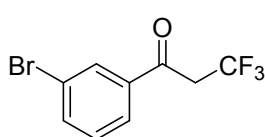

The title compound was isolated as a yellow liquid after chromatography on silica with a Combiflash system (100:0-99:1 petrol ether/ethyl acetate). Yield: 79%. <sup>1</sup>H NMR (500 MHz, CDCl<sub>3</sub>) δ 8.07 (s, 1H), 7.86 (d, *J* = 7.8 Hz, 1H), 7.77 (d, *J* = 7.9 Hz, 1H), 7.41 (t, *J* = 7.9 Hz, 1H), 3.78 (q, *J* = 9.8 Hz, 2H). <sup>13</sup>C NMR (126 MHz, CDCl<sub>3</sub>) δ 188.56 (s), 137.58 (s), 137.19 (s), 131.50 (s), 130.63 (s), 126.99 (s), 123.88 (q, *J* = 276.3 Hz), 123.45 (s), 42.34 (q, *J* = 28.8 Hz). <sup>19</sup>F NMR (470 MHz, CDCl<sub>3</sub>) δ -62.00 (s).

### 3,3,3-trifluoro-1-(3-(trifluoromethyl)phenyl)propan-1-one (3l) <sup>6</sup>

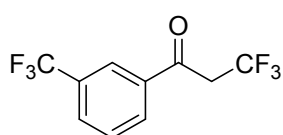

The title compound was isolated as a slightly yellow liquid after chromatography on silica with a Combiflash system (100:0-99:1 petrol ether/ethyl acetate). Yield: 86%. <sup>1</sup>H NMR (500 MHz, CDCl<sub>3</sub>) δ 8.19 (s, 1H), 8.13 (d, *J* = 7.9 Hz, 1H), 7.91 (d, *J* = 7.8 Hz, 1H), 7.69 (t, *J* = 7.8 Hz, 1H), 3.84 (d, *J* = 9.8 Hz, 2H). <sup>13</sup>C NMR (126 MHz, CDCl<sub>3</sub>) δ 188.60 (s), 136.41 (s), 132.02 (s), 131.75 (s), 131.58 (s), 130.72 (s), 130.72 (s), 125.32 (s), 123.82 (q, *J* = 277.6 Hz), 123.5 (q, *J* = 273.0 Hz), 42.45 (q, *J* = 28.6 Hz). <sup>19</sup>F NMR (470 MHz, CDCl<sub>3</sub>) δ -61.97 (s), -62.93 (s).

### 3,3,3-trifluoro-2-methyl-1-(3-phenoxyphenyl)propan-1-one (3m) <sup>2</sup>

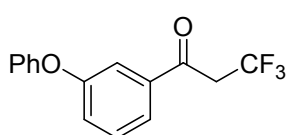

The title compound was isolated as a colorless liquid after chromatography on silica with a Combiflash system (100:0-96:4 petrol ether/ethyl acetate). Yield: 84%. <sup>1</sup>H NMR (500 MHz, CDCl<sub>3</sub>) δ 7.65 – 7.63 (m, 1H), 7.56 (t, *J* = 5.0 Hz, 1H), 7.48 (t, *J* = 7.5 Hz, 1H), 7.41 – 7.37 (m, 2H), 7.29 – 7.26 (m, 1H), 7.20 – 7.16 (m, 1H), 7.05 – 7.03 (m, 2H), 3.76 (q, *J* = 9.9 Hz, 2H). <sup>13</sup>C NMR (126 MHz, CDCl<sub>3</sub>) δ 191.74 (s), 189.24 (s), 158.34 (s), 156.33 (s), 137.61 (s), 130.45 (s), 130.20 (s), 124.32 (s), 124.03 (q, *J* = 278.0 Hz), 123.01 (s), 120.71 (s), 119.55 (d, *J* = 16.5 Hz), 117.94 (s), 42.38 (q, *J* = 28.6 Hz). <sup>19</sup>F NMR (470 MHz, CDCl<sub>3</sub>) δ -62.02 (s). HRMS (EI) Calcd. For

280.0711, C<sub>15</sub>H<sub>11</sub>F<sub>3</sub>O, found 280.0714.

### 1-(2,4-dichlorophenyl)-3,3,3-trifluoropropan-1-one (3n)<sup>7</sup>

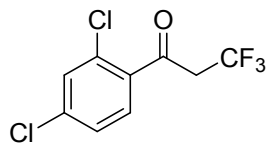

The title compound was isolated as a slightly yellow liquid after chromatography on silica with a Combiflash system (100:0-97:3 petrol ether/ethyl acetate). Yield: 82%. <sup>1</sup>H NMR (500 MHz, CDCl<sub>3</sub>) δ 7.54 (d, *J* = 8.4 Hz, 1H), 7.49 (d, *J* = 1.9 Hz, 1H), 7.38 (dd, *J* = 8.4, 1.9 Hz, 1H), 3.86 (q, *J* = 9.9 Hz, 2H). <sup>13</sup>C NMR (126 MHz, CDCl<sub>3</sub>) δ 191.17 (s), 139.06 (s), 135.88 (s), 132.49 (s), 131.08 (s), 130.85 (s), 127.94 (s), 123.56 (q, *J* = 278.0 Hz), 46.27 (q, *J* = 28.6 Hz). <sup>19</sup>F NMR (470 MHz, CDCl<sub>3</sub>) δ -62.13 (s).

### 1-(2-bromophenyl)-3,3,3-trifluoropropan-1-one (3o)<sup>2</sup>

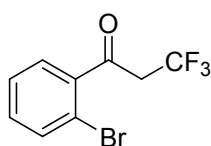

The title compound was isolated as a slightly yellow liquid after chromatography on silica with a Combiflash system (100:0-99:1 petrol ether/ethyl acetate). Yield: 81%. <sup>1</sup>H NMR (500 MHz, CDCl<sub>3</sub>) δ 7.68 – 7.64 (m, 1H), 7.47 – 7.41 (m, 2H), 7.39 – 7.36 (m, 1H), 3.85 (q, *J* = 10.0 Hz, 2H). <sup>13</sup>C NMR (126 MHz, CDCl<sub>3</sub>) δ 193.40 (s), 140.14 (s), 134.06 (s), 132.82 (s), 129.30 (s), 127.90 (s), 123.58 (q, *J* = 277.2 Hz), 45.98 (q, *J* = 28.1 Hz). <sup>19</sup>F NMR (470 MHz, CDCl<sub>3</sub>) δ -62.09 (s).

### 1-(2-chlorophenyl)-3,3,3-trifluoropropan-1-one (3p)<sup>2</sup>

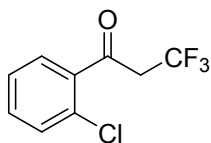

The title compound was isolated as a yellow liquid after chromatography on silica with a Combiflash system (100:0-99:1 petrol ether/ethyl acetate). Yield: 78%. <sup>1</sup>H NMR (500 MHz, CDCl<sub>3</sub>) δ 7.59 – 7.53 (m, 1H), 7.48 – 7.44 (m, 2H), 7.40 – 7.37 (m, 1H), 3.87 (q, *J* = 10.0 Hz, 2H). <sup>13</sup>C NMR (126 MHz, CDCl<sub>3</sub>) δ 192.50 (s), 137.79 (s), 133.10 (s), 131.33 (s), 130.90 (s), 129.83 (s), 127.45 (s), 123.68 (q, *J* = 278.5 Hz), 46.26 (q, *J* = 27.7 Hz). <sup>19</sup>F NMR (470 MHz, CDCl<sub>3</sub>) δ -62.17 (s).

### 3,3,3-trifluoro-1-(naphthalen-2-yl)propan-1-one (3q)<sup>2</sup>

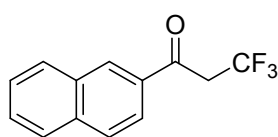

The title compound was isolated as a white solid after chromatography on silica with a Combiflash system (100:0-97:3 petrol ether/ethyl acetate). Yield: 85%. <sup>1</sup>H NMR (500 MHz, CDCl<sub>3</sub>) δ 8.41 (s, 1H), 8.03 – 7.96 (m, 2H), 7.93 – 7.89 (m, 2H), 7.68 – 7.63 (m, 1H), 7.62 – 7.57 (m, 1H), 3.94 (q, *J* = 10.0 Hz, 2H). <sup>13</sup>C NMR (126 MHz, CDCl<sub>3</sub>) δ 189.78 (s), 136.11 (s), 133.35 (s), 132.48 (s), 130.68 (s), 129.84 (s), 129.34 (s), 129.06 (s), 128.00 (s), 127.34 (s), 125.36 (s), 124.26 (q, *J* = 277.2 Hz), 123.59 (s), 42.28 (q, *J* = 28.5 Hz). <sup>19</sup>F NMR (470 MHz, CDCl<sub>3</sub>) δ -61.86 (s).

### 3,3,3-trifluoro-1-(naphthalen-1-yl)propan-1-one (3r)<sup>2</sup>

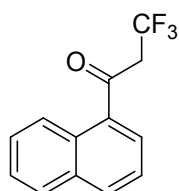

The title compound was isolated as a slightly yellow liquid after chromatography on silica with a Combiflash system (100:0-96:4 petrol ether/ethyl acetate). Yield: 63%. <sup>1</sup>H NMR (500 MHz, CDCl<sub>3</sub>) δ 8.73 (d, *J* = 8.6 Hz, 1H), 8.07 (d, *J* = 8.2 Hz, 1H), 7.91 (d, *J* = 8.1 Hz, 1H), 7.88 (d, *J* = 7.2 Hz, 1H), 7.66 (t, *J* = 7.5 Hz, 1H), 7.59 (t, *J* = 7.4 Hz, 1H), 7.54 (t, *J* = 7.7 Hz, 1H), 3.92 (q, *J* = 10.0 Hz, 2H). <sup>13</sup>C NMR (126 MHz, CDCl<sub>3</sub>) δ 192.99 (s), 134.4 (s), 134.17 (s), 133.97 (s), 130.33 (s),



129.21 (s), 128.88 (s), 128.72 (s), 127.06 (s), 125.73 (s), 124.30 (s), 124.13 (q,  $J = 277.2$  Hz), 45.10 (q,  $J = 28.1$  Hz).  $^{19}\text{F}$  NMR (470 MHz,  $\text{CDCl}_3$ )  $\delta$  -61.90 (s).

### 3,3,3-trifluoro-2-methyl-1-phenylpropan-1-one (3s)<sup>2</sup>

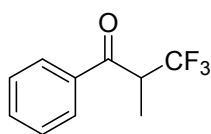

The title compound was isolated as a colorless liquid after chromatography on silica with a Combiflash system (100:0-99:1 petrol ether/ethyl acetate). Yield: 74%.  $^1\text{H}$  NMR (500 MHz,  $\text{CDCl}_3$ )  $\delta$  7.97 (d,  $J = 8.1$  Hz, 2H), 7.64 (dd,  $J = 10.7, 4.1$  Hz, 1H), 7.52 (t,  $J = 7.8$  Hz, 2H), 4.32 – 4.20 (m, 1H), 1.49 (d,  $J = 7.2$  Hz, 3H).  $^{13}\text{C}$  NMR (126 MHz,  $\text{CDCl}_3$ )  $\delta$  194.53 (s), 135.83 (s), 134.11 (s), 129.04 (s), 128.73 (s), 125.43 (q,  $J = 281.0$  Hz), 44.44 (q,  $J = 26.5$  Hz), 11.81 (s).  $^{19}\text{F}$  NMR (470 MHz,  $\text{CDCl}_3$ )  $\delta$  -68.24 (s).

### 3,3,3-trifluoro-1,2-diphenylpropan-1-one (3t)<sup>2</sup>

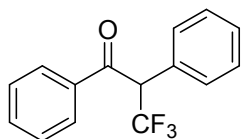

The title compound was isolated as a slightly yellow liquid after chromatography on silica with a Combiflash system (100:0-98:2 petrol ether/ethyl acetate). Yield: 60%.  $^1\text{H}$  NMR (500 MHz,  $\text{CDCl}_3$ )  $\delta$  7.91 (dd,  $J = 8.4, 1.1$  Hz, 2H), 7.55-7.52 (m, 1H), 7.50 – 7.44 (m, 2H), 7.45 – 7.34 (m, 5H), 5.29 (q,  $J = 8.2$  Hz, 1H).  $^{13}\text{C}$  NMR (126 MHz,  $\text{CDCl}_3$ )  $\delta$  191.23 (s), 135.55 (s), 133.90 (s), 129.97 (s), 129.82 (s), 129.41 (s), 129.32 (s), 129.13 (s), 128.92 (s), 124.37 (q,  $J = 275.9$  Hz), 56.70 (s,  $J = 26.5$  Hz).  $^{19}\text{F}$  NMR (470 MHz,  $\text{CDCl}_3$ )  $\delta$  -66.50 (s).

### 3,3,3-trifluoro-1-(thiophen-2-yl)propan-1-one (3u)<sup>5</sup>

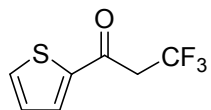

The title compound was isolated as a colorless liquid after chromatography on silica with a Combiflash system (100:0-99:1 petrol ether/ethyl acetate). Yield: 89%.  $^1\text{H}$  NMR (500 MHz,  $\text{CDCl}_3$ )  $\delta$  7.76 (dd,  $J = 4.9, 1.0$  Hz, 1H), 7.74 (dd,  $J = 3.8, 0.8$  Hz, 1H), 7.19 (dd,  $J = 4.9, 3.9$  Hz, 1H), 3.72 (q,  $J = 10.1$  Hz, 2H).  $^{13}\text{C}$  NMR (126 MHz,  $\text{CDCl}_3$ )  $\delta$  182.27 (s), 143.34 (s), 135.82 (s), 133.52 (s), 128.62 (s), 123.77 (q,  $J = 278.0$  Hz), 43.21 (q,  $J = 29.0$  Hz).  $^{19}\text{F}$  NMR (470 MHz,  $\text{CDCl}_3$ )  $\delta$  -61.90 (s).

### 1,1,1-trifluoro-5-phenylpentan-3-one (3v)<sup>3</sup>

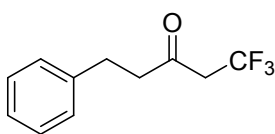

The title compound was isolated as a colorless liquid after chromatography on silica with a Combiflash system (100:0-99:1 petrol ether/ethyl acetate). Yield: 71%.  $^1\text{H}$  NMR (500 MHz,  $\text{CDCl}_3$ )  $\delta$  7.31 (t,  $J = 7.5$  Hz, 2H), 7.23 (t,  $J = 7.5$  Hz, 1H), 7.19 (t,  $J = 7.3$  Hz, 2H), 3.20 (q,  $J = 10.4$  Hz, 2H), 2.95 (t,  $J = 7.2$  Hz, 2H), 2.87 (t,  $J = 7.4$  Hz, 2H).  $^{13}\text{C}$  NMR (126 MHz,  $\text{CDCl}_3$ )  $\delta$  199.31 (s), 140.26 (s), 128.76 (s), 128.42 (s), 126.53 (s), 123.68 (q,  $J = 277.6$  Hz), 46.65 (q,  $J = 28.6$  Hz), 45.09 (s), 29.34 (s).  $^{19}\text{F}$  NMR (470 MHz,  $\text{CDCl}_3$ )  $\delta$  -62.32 (s).

### 3-(3,3,3-trifluoropropanoyl)benzaldehyde(3w)<sup>2</sup>

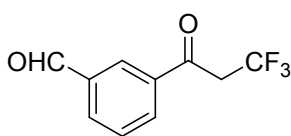

The title compound was isolated as a colorless liquid after chromatography on silica with a Combiflash system (100:0-97:3 petrol ether/ethyl acetate). Yield: 84%.  $^1\text{H}$  NMR (500 MHz,  $\text{CDCl}_3$ )  $\delta$  10.11 (s, 1H), 8.41 (s, 1H), 8.22 (d,  $J = 7.8$  Hz, 1H), 8.16 (d,  $J = 7.6$  Hz, 1H), 7.73 (t,  $J = 7.7$  Hz, 1H), 3.87 (t,  $J = 9.8$  Hz, 2H).  $^{13}\text{C}$  NMR (126 MHz,  $\text{CDCl}_3$ )  $\delta$  191.10 (s), 189.00 (s), 136.98 (s), 136.65 (s), 134.87 (s), 133.79 (s), 130.06 (s), 129.31 (s), 123.89 (q,  $J = 278.04$  Hz).

H<sub>z</sub>), 42.45 (q, *J* = 28.98 Hz). <sup>19</sup>F NMR (470 MHz, CDCl<sub>3</sub>) δ -61.96 (s).

#### ethyl (Z)-2-fluoro-4-oxo-4-phenylbut-2-enoate (4a) <sup>8</sup>

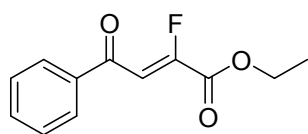

The title compound was isolated as a colorless liquid after chromatography on silica with a Combiflash system (100:0-95:5 petrol ether/ethyl acetate). Yield: 85%. <sup>1</sup>H NMR (500 MHz, CDCl<sub>3</sub>) δ 7.95 (d, *J* = 7.6 Hz, 2H), 7.63 (t, *J* = 7.4 Hz, 1H), 7.51 (t, *J* = 7.7 Hz, 2H), 7.13 (d, *J* = 30.8 Hz, 1H), 4.40 (q, *J* = 7.1 Hz, 2H), 1.40 (t, *J* = 7.2 Hz, 3H). <sup>13</sup>C NMR (126 MHz, CDCl<sub>3</sub>) δ 188.33 (s), 160.29 (d, *J* = 34.0 Hz), 152.24 (d, *J* = 286.0 Hz), 136.82 (s), 134.17 (s), 128.95 (s), 128.92 (s), 112.22 (s), 63.00 (s), 14.20 (s). <sup>19</sup>F NMR (470 MHz, CDCl<sub>3</sub>) δ -110.39 (s).

#### ethyl (Z)-4-(4-chlorophenyl)-2-fluoro-4-oxobut-2-enoate (4b)

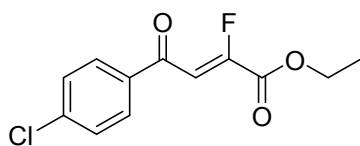

The title compound was isolated as a slightly yellow liquid after chromatography on silica with a Combiflash system (100:0-95:5 petrol ether/ethyl acetate). Yield: 60%. <sup>1</sup>H NMR (500 MHz, CDCl<sub>3</sub>) δ 7.88 (d, *J* = 8.6 Hz, 2H), 7.48 (d, *J* = 8.5 Hz, 2H), 7.07 (d, *J* = 30.6 Hz, 1H), 4.40 (q, *J* = 7.1 Hz, 2H), 1.40 (t, *J* = 7.1 Hz, 3H). <sup>13</sup>C NMR (126 MHz, CDCl<sub>3</sub>) δ 187.10 (s), 160.13 (d, *J* = 34.0 Hz), 152.49 (d, *J* = 287.3 Hz), 140.76 (s), 135.17 (s), 130.28 (s), 129.35 (s), 111.77 (s), 63.08 (s), 14.19 (s). <sup>19</sup>F NMR (470 MHz, CDCl<sub>3</sub>) δ -109.34 (s). HRMS (EI) Calcd. For 256.0303, C<sub>12</sub>H<sub>10</sub>ClFO<sub>3</sub>, found 256.0302.

#### ethyl (Z)-2-fluoro-4-(4-fluorophenyl)-4-oxobut-2-enoate (4c)

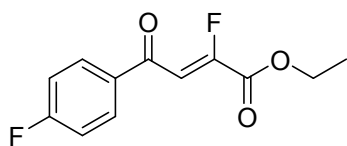

The title compound was isolated as a colorless liquid after chromatography on silica with a Combiflash system (100:0-95:5 petrol ether/ethyl acetate). Yield: 75%. <sup>1</sup>H NMR (500 MHz, CDCl<sub>3</sub>) δ 7.98 (dd, *J* = 8.7, 5.4 Hz, 2H), 7.18 (t, *J* = 8.5 Hz, 2H), 7.08 (d, *J* = 30.7 Hz, 1H), 4.40 (q, *J* = 7.1 Hz, 2H), 1.40 (t, *J* = 7.2 Hz, 3H). <sup>13</sup>C NMR (126 MHz, CDCl<sub>3</sub>) δ 186.79 (s), 166.44 (d, *J* = 257.0 Hz), 160.18 (d, *J* = 34.8 Hz), 152.28 (d, *J* = 286.0 Hz), 133.26 (s), 131.68 (d, *J* = 8.9 Hz), 116.23 (d, *J* = 22.7 Hz), 112.01 (s), 63.05 (s), 14.18 (s). <sup>19</sup>F NMR (470 MHz, CDCl<sub>3</sub>) δ -103.11 (s), -109.97 (s). HRMS (EI) Calcd. For 240.0598, C<sub>12</sub>H<sub>10</sub>F<sub>2</sub>O<sub>3</sub>, found 240.0593.

#### ethyl (Z)-4-(4-(tert-butyl)phenyl)-2-fluoro-4-oxobut-2-enoate (4d)

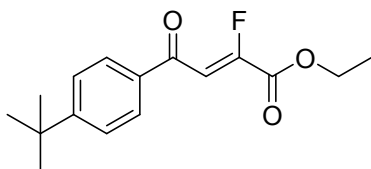

The title compound was isolated as a slightly yellow liquid after chromatography on silica with a Combiflash system (100:0-95:5 petrol ether/ethyl acetate). Yield: 78%. <sup>1</sup>H NMR (500 MHz, CDCl<sub>3</sub>) δ 7.89 (d, *J* = 8.4 Hz, 2H), 7.52 (d, *J* = 8.6 Hz, 2H), 7.12 (d, *J* = 31.0 Hz, 1H), 4.40 (q, *J* = 7.1 Hz, 2H), 1.40 (t, *J* = 7.1 Hz, 3H), 1.36 (s, 9H). <sup>13</sup>C NMR (126 MHz, CDCl<sub>3</sub>) δ 187.92 (s), 160.39 (d, *J* = 35.3 Hz), 158.18 (s), 151.95 (d, *J* = 284.8 Hz), 134.28 (s), 128.94 (s), 125.96 (s), 112.46 (s), 62.92 (s), 35.40 (s), 31.15 (s), 14.20 (s). <sup>19</sup>F NMR (470 MHz, CDCl<sub>3</sub>) δ -111.18 (s). HRMS (ESI) Calcd. For 279.1396, C<sub>16</sub>H<sub>19</sub>FO<sub>3</sub> [M-H]<sup>+</sup>, found 279.1407.

#### ethyl (Z)-2-fluoro-4-oxo-4-(3-phenoxyphenyl)but-2-enoate (4e)

The title compound was isolated as a colorless liquid after chromatography on silica with a

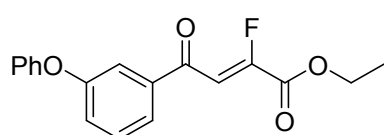

Combiflash system (100:0-92:8 petrol ether/ethyl acetate). Yield: 79%.  $^1\text{H}$  NMR (500 MHz,  $\text{CDCl}_3$ )  $\delta$  7.66 (d,  $J = 7.6$  Hz, 1H), 7.58 (s, 1H), 7.46 (t,  $J = 7.9$  Hz, 1H), 7.38 (t,  $J = 7.7$  Hz, 2H), 7.27 – 7.23 (m, 1H), 7.17 (t,  $J = 7.4$  Hz, 1H), 7.09 (d,  $J = 30.6$  Hz, 1H), 7.04 (d,  $J = 8.4$  Hz, 2H), 4.39 (q,  $J = 6.8$  Hz, 2H), 1.39 (t,  $J = 7.1$  Hz, 3H).  $^{13}\text{C}$  NMR (126 MHz,  $\text{CDCl}_3$ )  $\delta$  187.64 (s), 160.19 (d,  $J = 34.7$  Hz), 158.20 (s), 156.46 (s), 152.44 (d,  $J = 286.0$  Hz), 138.55 (s), 130.37 (s), 130.15 (s), 124.21 (s), 123.59 (s), 119.41 (s), 118.32 (s), 111.97 (s), 63.03 (s), 14.19 (s).  $^{19}\text{F}$  NMR (470 MHz,  $\text{CDCl}_3$ )  $\delta$  -109.74 (s). HRMS (ESI) Calcd. For 315.1033,  $\text{C}_{18}\text{H}_{15}\text{FO}_4$   $[\text{M}-\text{H}]^+$ , found 315.1022.

#### ethyl (Z)-4-(3-bromophenyl)-2-fluoro-4-oxobut-2-enoate (4f)

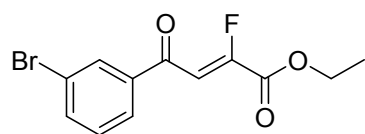

The title compound was isolated as a yellow liquid after chromatography on silica with a Combiflash system (100:0-95:5 petrol ether/ethyl acetate). Yield: 65%.  $^1\text{H}$  NMR (500 MHz,  $\text{CDCl}_3$ )  $\delta$  8.07 (s, 1H), 7.87 (d,  $J = 7.8$  Hz, 1H), 7.76 (d,  $J = 7.0$  Hz, 1H), 7.40 (t,  $J = 7.9$  Hz, 1H), 7.08 (d,  $J = 30.3$  Hz, 1H), 4.41 (q,  $J = 7.1$  Hz, 2H), 1.41 (t,  $J = 7.1$  Hz, 3H).  $^{13}\text{C}$  NMR (126 MHz,  $\text{CDCl}_3$ )  $\delta$  186.96 (s), 160.10 (d,  $J = 34.0$  Hz), 152.80 (d,  $J = 289.8$  Hz), 138.57 (s), 136.96 (s), 131.76 (s), 130.55 (s), 127.42 (s), 123.31 (s), 111.49 (s), 63.15 (s), 14.19 (s).  $^{19}\text{F}$  NMR (470 MHz,  $\text{CDCl}_3$ )  $\delta$  -108.65 (s). HRMS (ESI) Calcd. For 300.9876,  $\text{C}_{12}\text{H}_{10}\text{BrFO}_3$   $[\text{M}-\text{H}]^+$ , found 300.9889.

#### ethyl (Z)-4-(4-acetoxyphenyl)-2-fluoro-4-oxobut-2-enoate (4g)

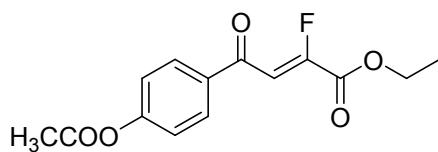

The title compound was isolated as a colorless liquid after chromatography on silica with a Combiflash system (100:0-90:10 petrol ether/ethyl acetate). Yield: 70%.  $^1\text{H}$  NMR (500 MHz,  $\text{CDCl}_3$ )  $\delta$  7.99 (d,  $J = 8.6$  Hz, 2H), 7.25 (d,  $J = 8.7$  Hz, 2H), 7.10 (d,  $J = 30.7$  Hz, 1H), 4.39 (q,  $J = 7.2$  Hz, 2H), 2.34 (s, 3H), 1.40 (t,  $J = 7.1$  Hz, 3H).  $^{13}\text{C}$  NMR (126 MHz,  $\text{CDCl}_3$ )  $\delta$  187.03 (s), 168.78 (s), 160.20 (d,  $J = 35.1$  Hz), 155.21 (s), 152.33 (d,  $J = 287.3$  Hz), 134.33 (s), 130.57 (s), 122.22 (s), 111.96 (s), 63.03 (s), 21.26 (s), 14.18 (s).  $^{19}\text{F}$  NMR (470 MHz,  $\text{CDCl}_3$ )  $\delta$  -109.98 (s). HRMS (ESI) Calcd. For 303.0645,  $\text{C}_{14}\text{H}_{13}\text{FO}_5$   $[\text{M}-\text{Na}]^+$ , found 303.0659.

#### ethyl (Z)-2-fluoro-4-(naphthalen-2-yl)-4-oxobut-2-enoate (4h)

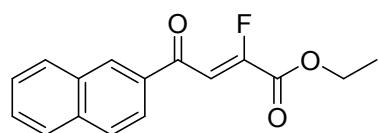

The title compound was isolated as a colorless liquid after chromatography on silica with a Combiflash system (100:0-95:5 petrol ether/ethyl acetate). Yield: 72%.  $^1\text{H}$  NMR (500 MHz,  $\text{CDCl}_3$ )  $\delta$  8.44 (s, 1H), 8.03 (d,  $J = 8.6$  Hz, 1H), 7.99 (t,  $J = 7.5$  Hz, 1H), 7.93 (d,  $J = 8.5$  Hz, 1H), 7.90 (d,  $J = 8.2$  Hz, 1H), 7.64 (t,  $J = 7.4$  Hz, 1H), 7.59 (t,  $J = 7.5$  Hz, 1H), 7.28 (d,  $J = 30.0$  Hz, 1H), 4.43 (q,  $J = 7.1$  Hz, 2H), 1.43 (t,  $J = 7.1$  Hz, 3H).  $^{13}\text{C}$  NMR (126 MHz,  $\text{CDCl}_3$ )  $\delta$  188.16 (s), 160.41 (d,  $J = 35.3$  Hz), 152.25 (d,  $J = 286.0$  Hz), 136.14 (s), 134.23 (s), 132.57 (s), 131.37 (s), 129.88 (s), 129.23 (s), 129.02 (s), 128.03 (s), 127.20 (s), 123.85 (s), 112.39 (s), 63.04 (s), 14.23 (s).  $^{19}\text{F}$  NMR (470 MHz,  $\text{CDCl}_3$ )  $\delta$  -110.67 (s). HRMS (ESI) Calcd. For 273.0927,  $\text{C}_{16}\text{H}_{13}\text{FO}_3$   $[\text{M}-\text{H}]^+$ , found 273.0929.

### (Z)-3,4,4,4-tetrafluoro-1-phenylbut-2-en-1-one (5a)<sup>9</sup>

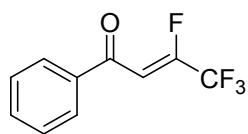

The title compound was isolated as a colorless liquid after chromatography on silica with a Combiflash system (100:0-98:2 petrol ether/ethyl acetate). Yield: 80%. <sup>1</sup>H NMR (500 MHz, CDCl<sub>3</sub>) δ 7.94 (d, *J* = 7.4 Hz, 2H), 7.66 (t, *J* = 7.4 Hz, 1H), 7.54 (t, *J* = 7.8 Hz, 2H), 6.73 (d, *J* = 31.4 Hz, 1H). <sup>13</sup>C NMR (126 MHz, CDCl<sub>3</sub>) δ 186.65 (s), 136.39 (s), 134.50 (s), 129.13 (s), 128.88 (s), 107.92 (s). <sup>19</sup>F NMR (470 MHz, CDCl<sub>3</sub>) δ -73.14 (d, *J* = 10.0 Hz), -116.89 (q, *J* = 10.1 Hz).

### (Z)-1-(4-(tert-butyl)phenyl)-3,4,4,4-tetrafluorobut-2-en-1-one (5b)

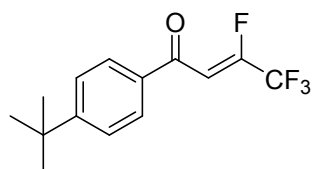

The title compound was isolated as a slightly yellow liquid after chromatography on silica with a Combiflash system (100:0-98:2 petrol ether/ethyl acetate). Yield: 78%. <sup>1</sup>H NMR (500 MHz, CDCl<sub>3</sub>) δ 7.87 (d, *J* = 8.4 Hz, 2H), 7.54 (d, *J* = 8.4 Hz, 2H), 6.71 (d, *J* = 31.7 Hz, 1H), 1.36 (s, 9H). <sup>13</sup>C NMR (126 MHz, CDCl<sub>3</sub>) δ 185.13 (s), 157.54 (s), 150.90 (q, *J* = 39.9 Hz), 148.65 (q, *J* = 39.9 Hz), 132.76 (s), 127.82 (s), 125.02 (s), 120.35-113.49 (m), 107.04 (s), 34.35 (s), 30.02 (s). <sup>19</sup>F NMR (470 MHz, CDCl<sub>3</sub>) δ -73.15 (d, *J* = 10.2 Hz), -117.78 (q, *J* = 11.0 Hz). HRMS (EI) Calcd. For 274.0981, C<sub>14</sub>H<sub>14</sub>F<sub>4</sub>O<sub>3</sub>, found 274.0975.

### (Z)-3,4,4,4-tetrafluoro-1-(naphthalen-2-yl)but-2-en-1-one (5c)<sup>10</sup>

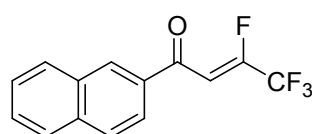

The title compound was isolated as a slightly yellow solid after chromatography on silica with a Combiflash system (100:0-97:3 petrol ether/ethyl acetate). Yield: 75%. <sup>1</sup>H NMR (500 MHz, CDCl<sub>3</sub>) δ 8.41 (s, 1H), 8.01 (d, *J* = 7.9 Hz, 2H), 7.95 (d, *J* = 8.6 Hz, 1H), 7.92 (d, *J* = 8.1 Hz, 1H), 7.67 (t, *J* = 7.3 Hz, 1H), 7.61 (t, *J* = 7.4 Hz, 1H), 6.87 (d, *J* = 31.3 Hz, 1H). <sup>13</sup>C NMR (126 MHz, CDCl<sub>3</sub>) δ 186.47 (s), 136.26 (s), 133.80 (s), 132.52 (s), 131.36 (s), 129.90 (s), 129.46 (s), 129.22 (s), 128.07 (s), 127.37 (s), 123.69 (s), 108.03 (s). <sup>19</sup>F NMR (470 MHz, CDCl<sub>3</sub>) δ -73.04 (d, *J* = 10.2 Hz), -117.09 (q, *J* = 11.0 Hz).

## Reference

- (1) Gallagher, K. J.; Webster, R. L., Chem. Commun. 2014, 50 (81), 12109-12111..
- (2) Deb, A.; Manna, S.; Modak, A.; Patra, T.; Maity, S.; Maiti, D., Angew. Chem., Int. Ed., 2013, 52 (37), 9747-9750.
- (3) He, Z.; Zhang, R.; Hu, M.; Li, L.; Ni, C.; Hu, J., Chem. Sci., 2013, 4 (9), 3478.
- (4) CAS: 1639446-64-2.
- (5) Lu, Q.; Liu, C.; Huang, Z.; Ma, Y.; Zhang, J.; Lei, A., Chem. Commun., 2014, 50 (91), 14101-4.
- (6) Ohtsuka, Y.; Uruguchi, D.; Yamamoto, K.; Tokuhisa, K.; Yamakawa, T., J. Fluorine Chem., 2016, 181, 1-6.
- (7) Novák, P.; Lishchynskiy, A.; Grushin, V. V., J. Am. Chem. Soc., 2012, 134 (39), 16167-16170.

(8) K. Sato, Y. Ogawa, M. Tamura, M. Harada, T. Ohara, M. Omote, A. Ando and I. Kumadaki, Collect. Czech. Chem. Commun., 2002, 67, 1285;

(9) Sano, K.; Fukuhara, T.; Hara, S., J. Fluorine Chem., 2009, 130 (8), 708-713.

(10) CAS: 1214712-41-0

## 5. NMR Spectra of all products

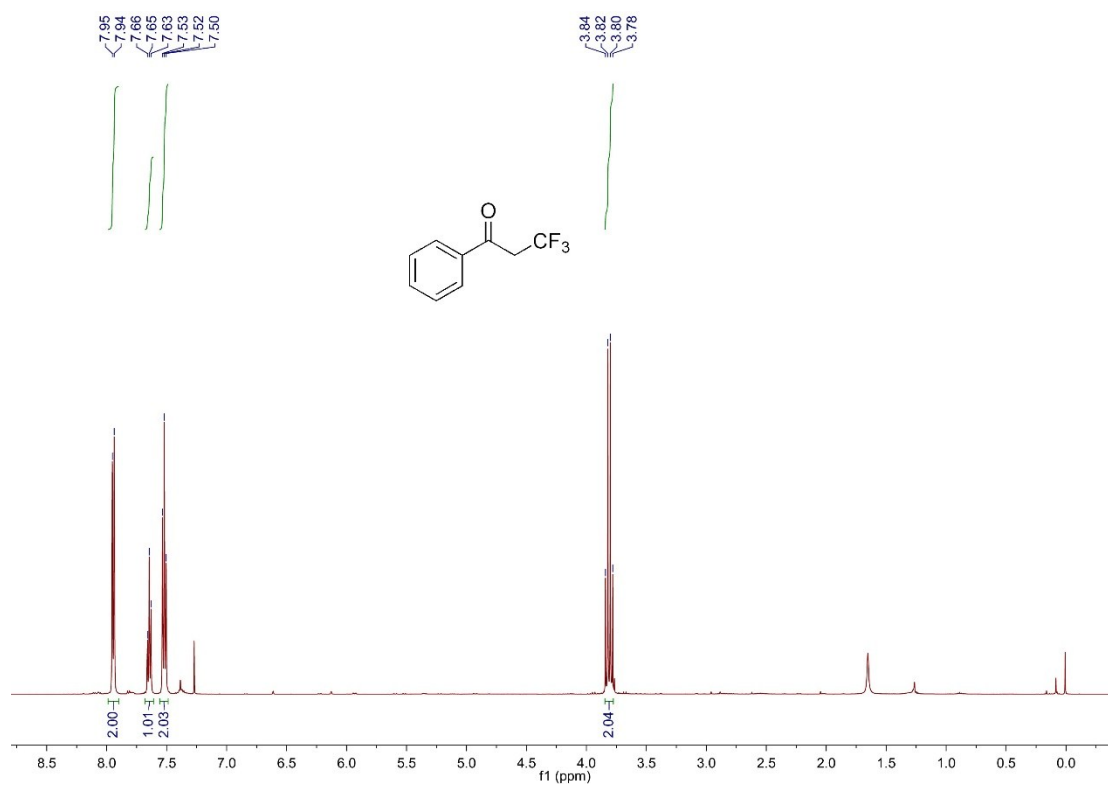

$^1\text{H}$  NMR **3a**

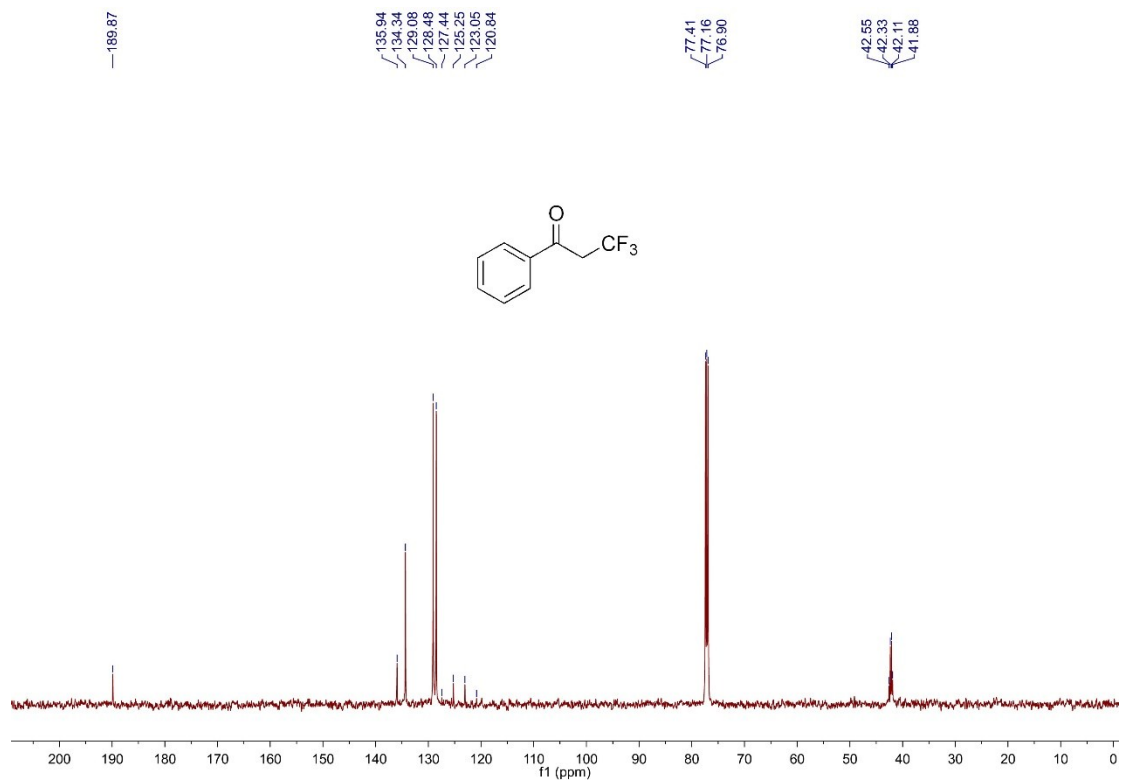

<sup>13</sup>C NMR **3a**

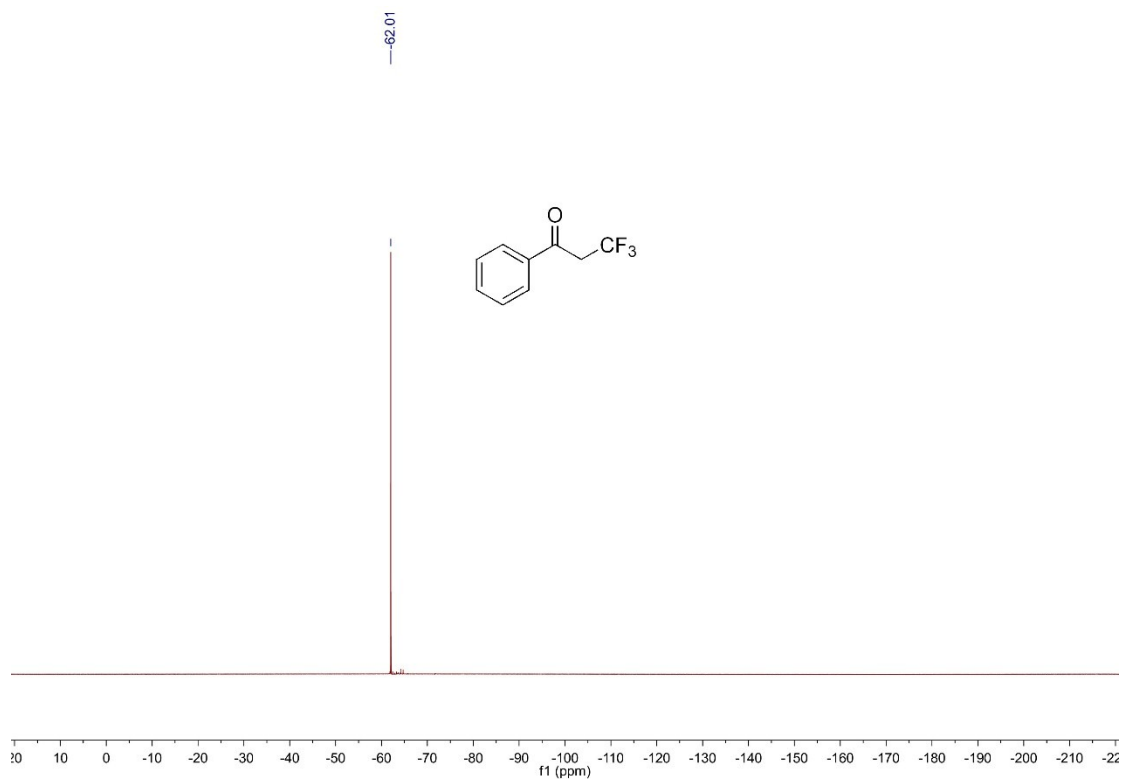

<sup>19</sup>F NMR **3a**

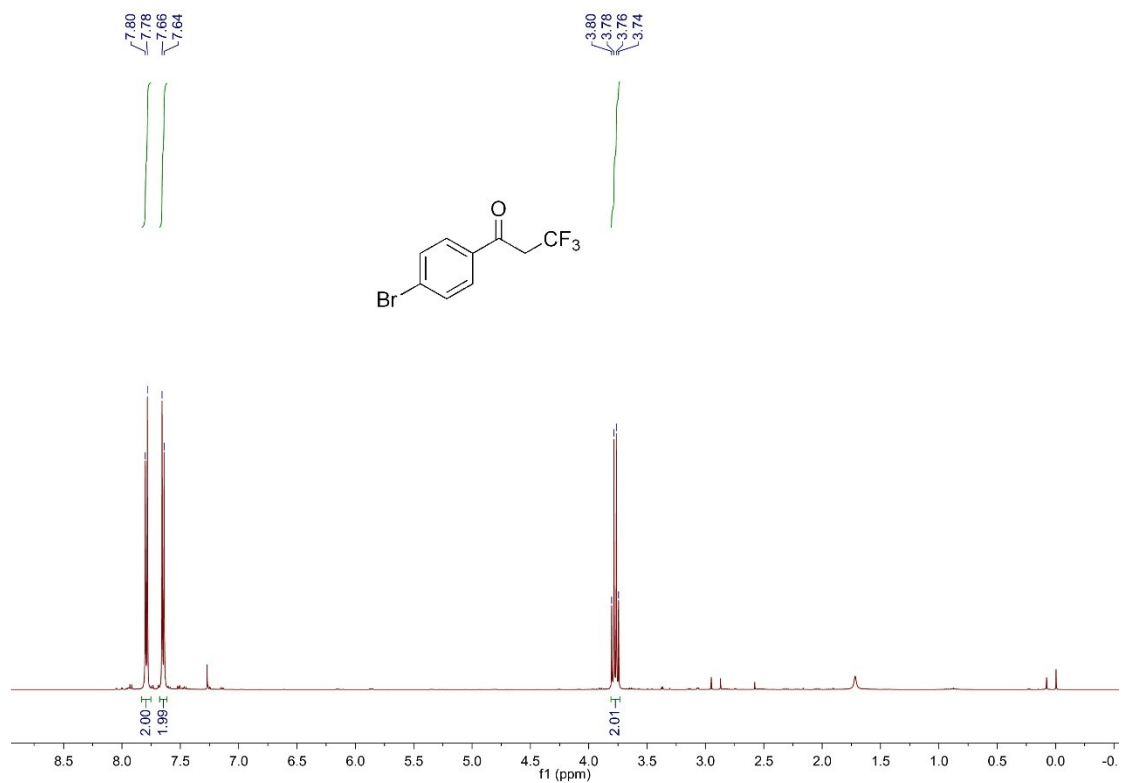

<sup>1</sup>H NMR 3b

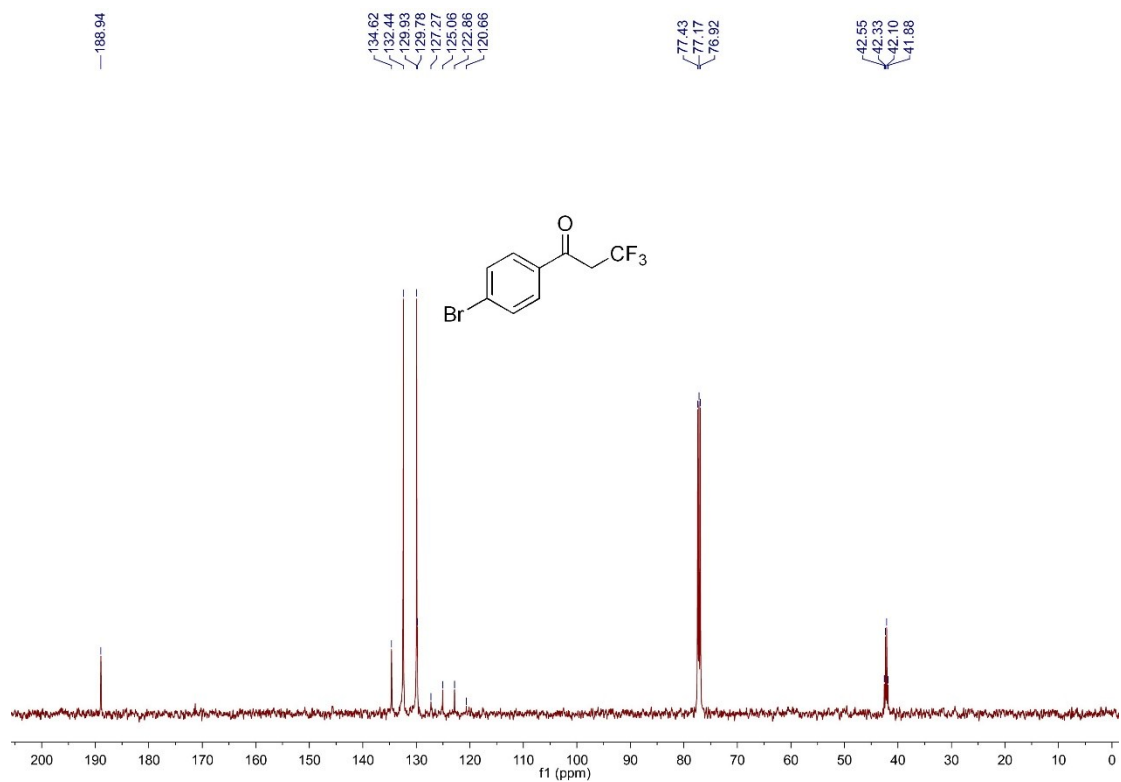

<sup>13</sup>C NMR 3b

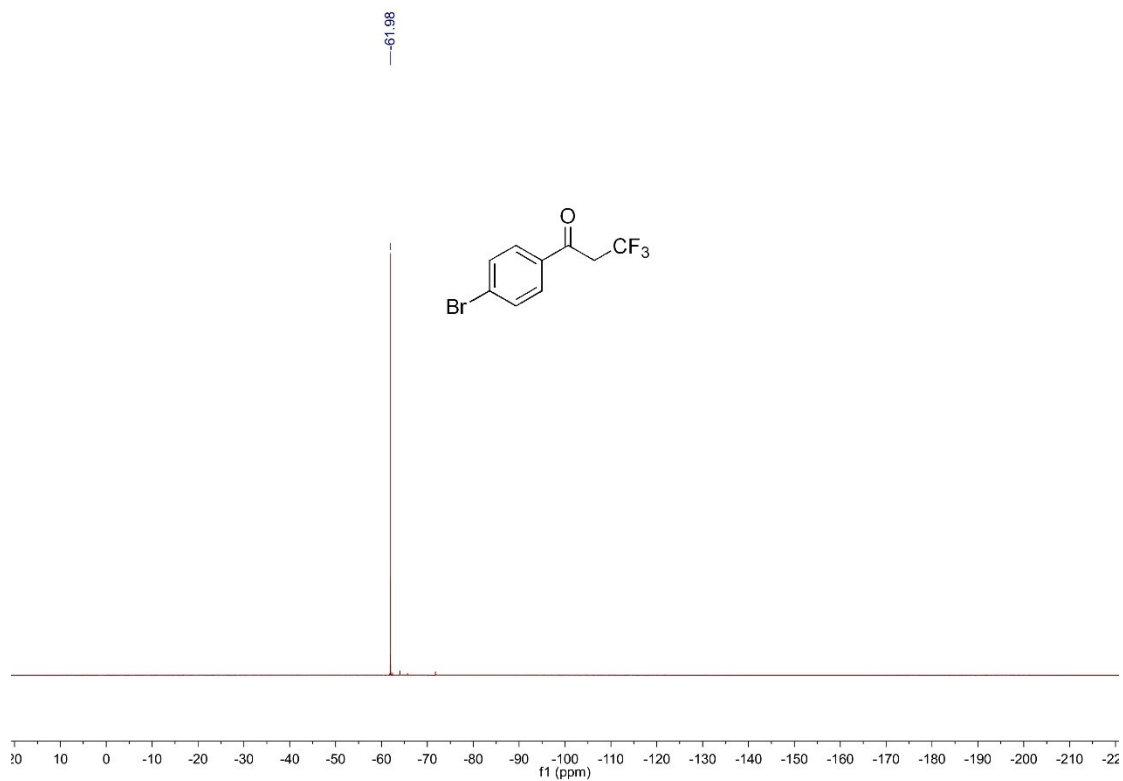

$^{19}\text{F}$  NMR 3b

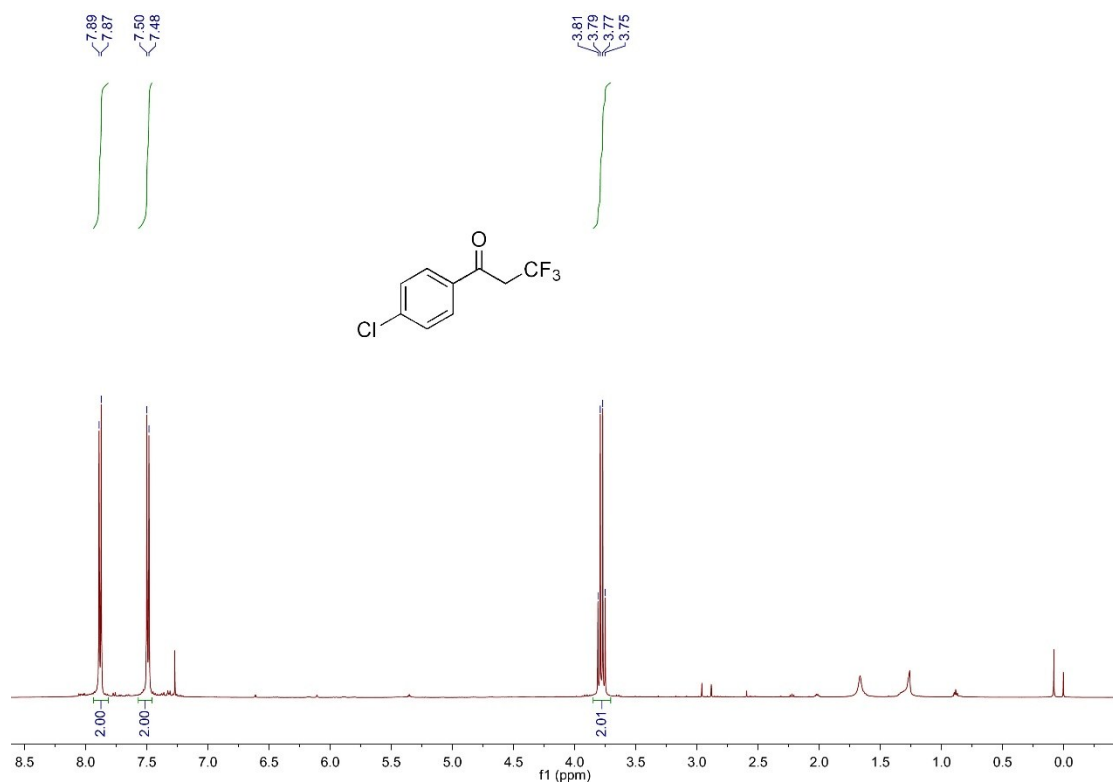

$^1\text{H}$  NMR 3c



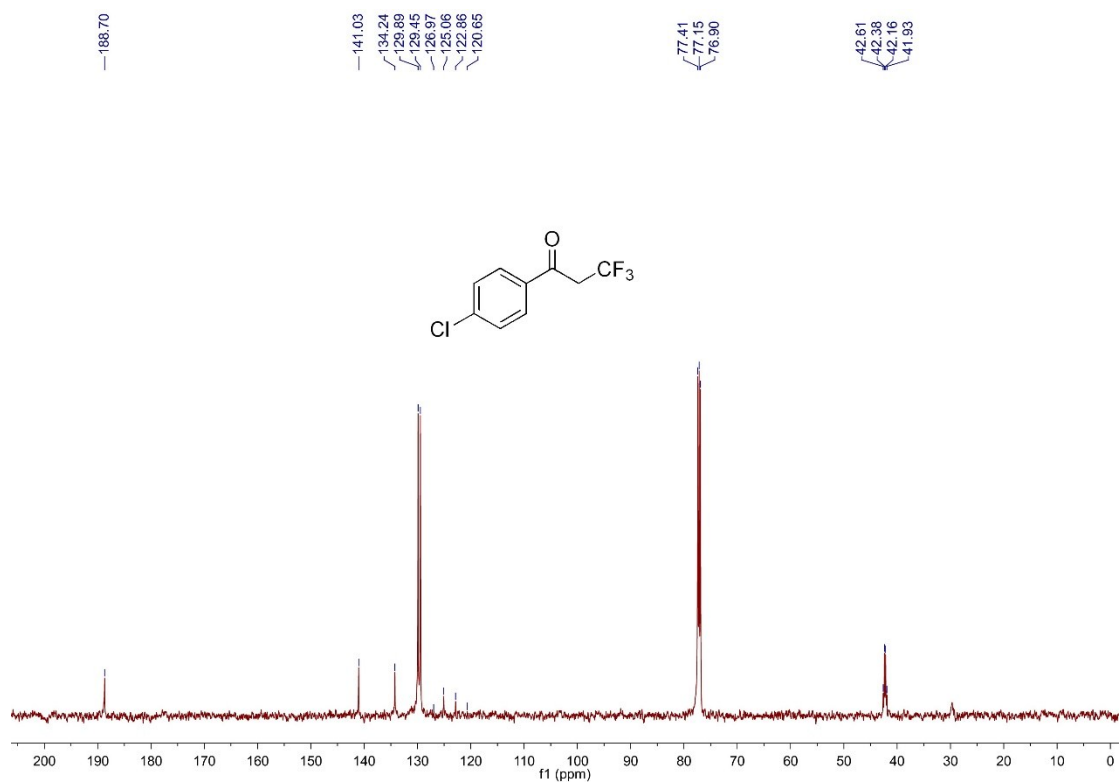

$^{13}\text{C}$  NMR **3c**

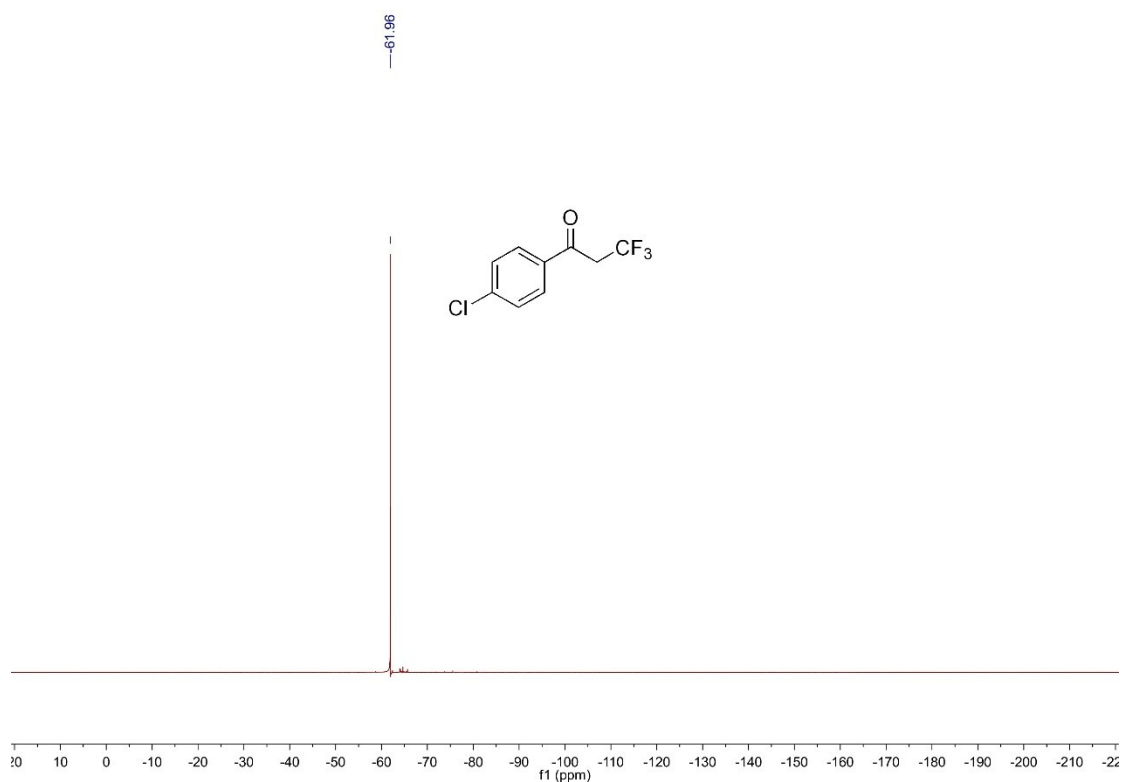

$^{19}\text{F}$  NMR **3c**

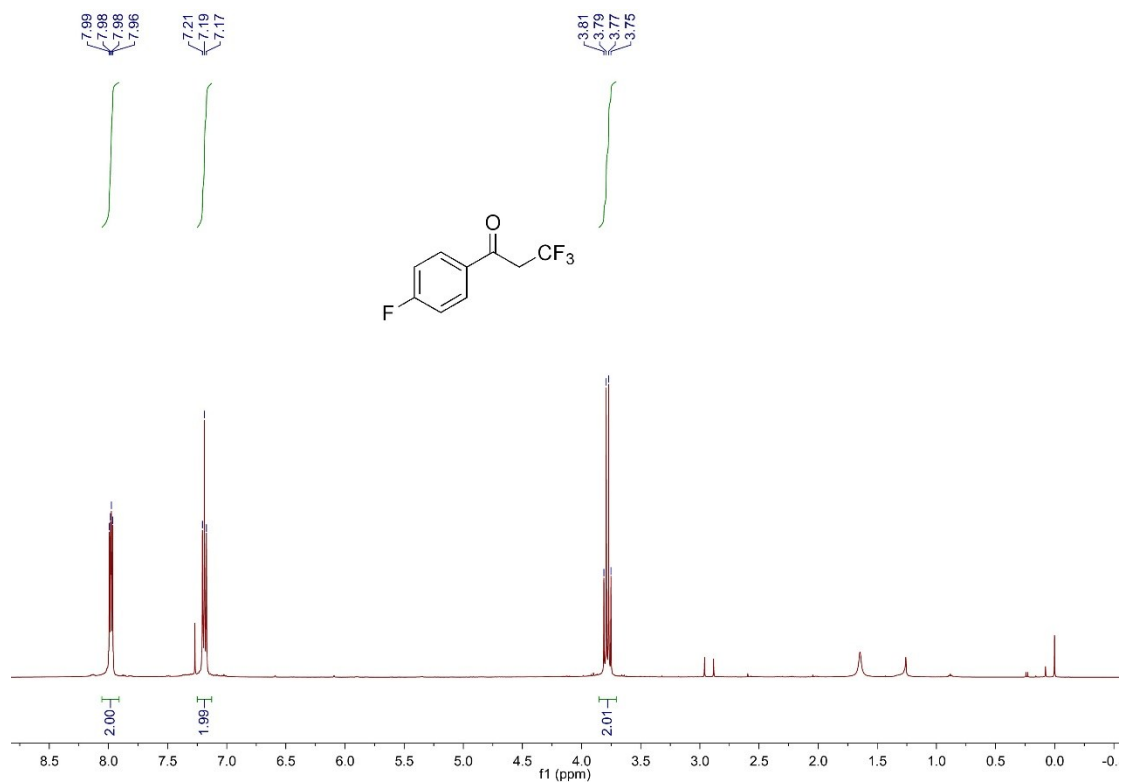

<sup>1</sup>H NMR 3d

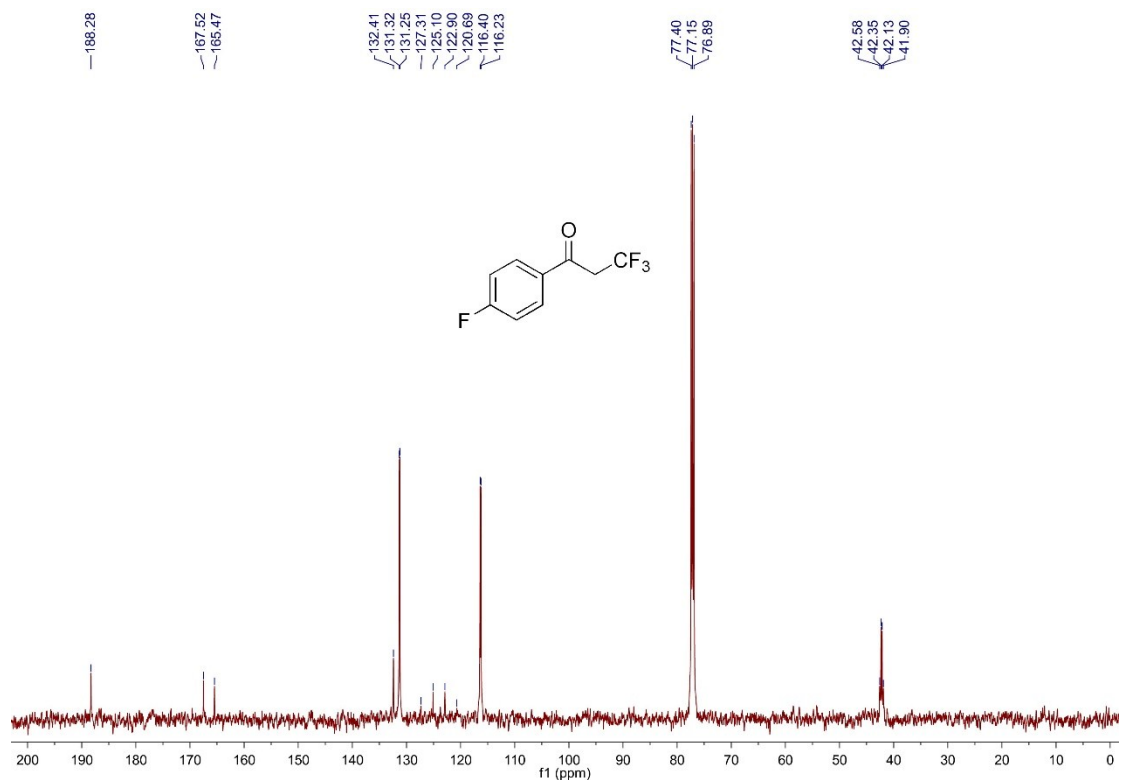

<sup>13</sup>C NMR 3d

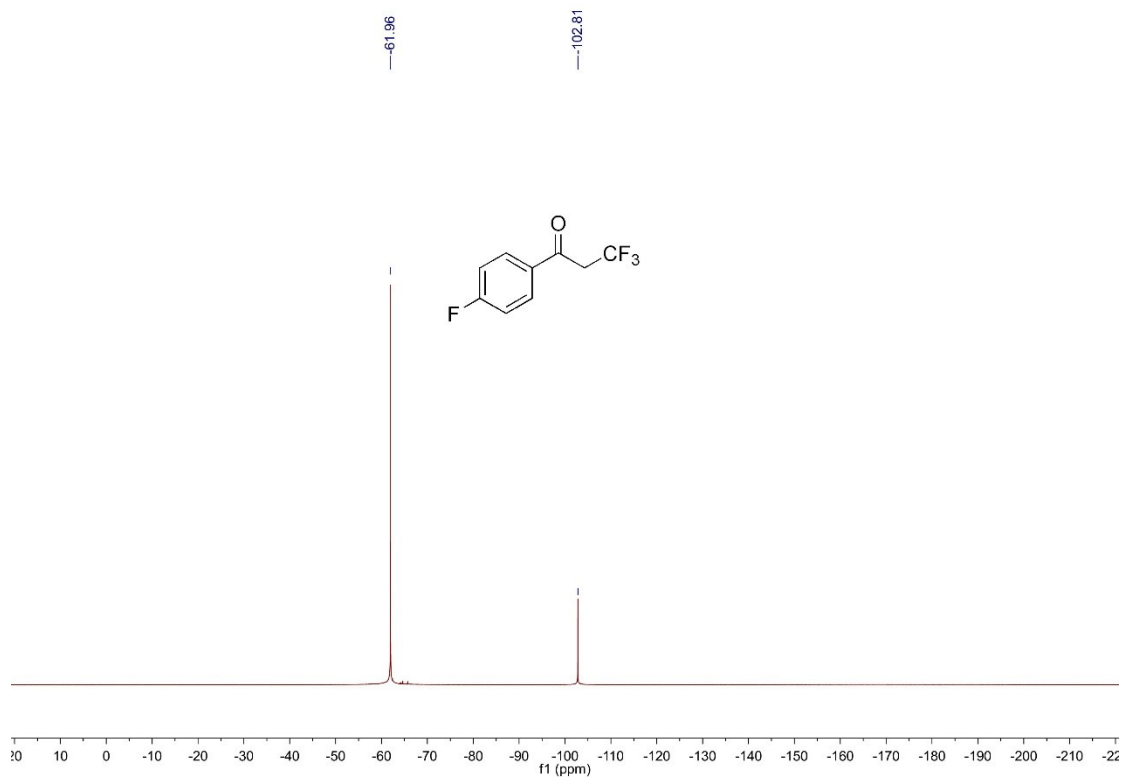

**<sup>19</sup>F NMR 3d**

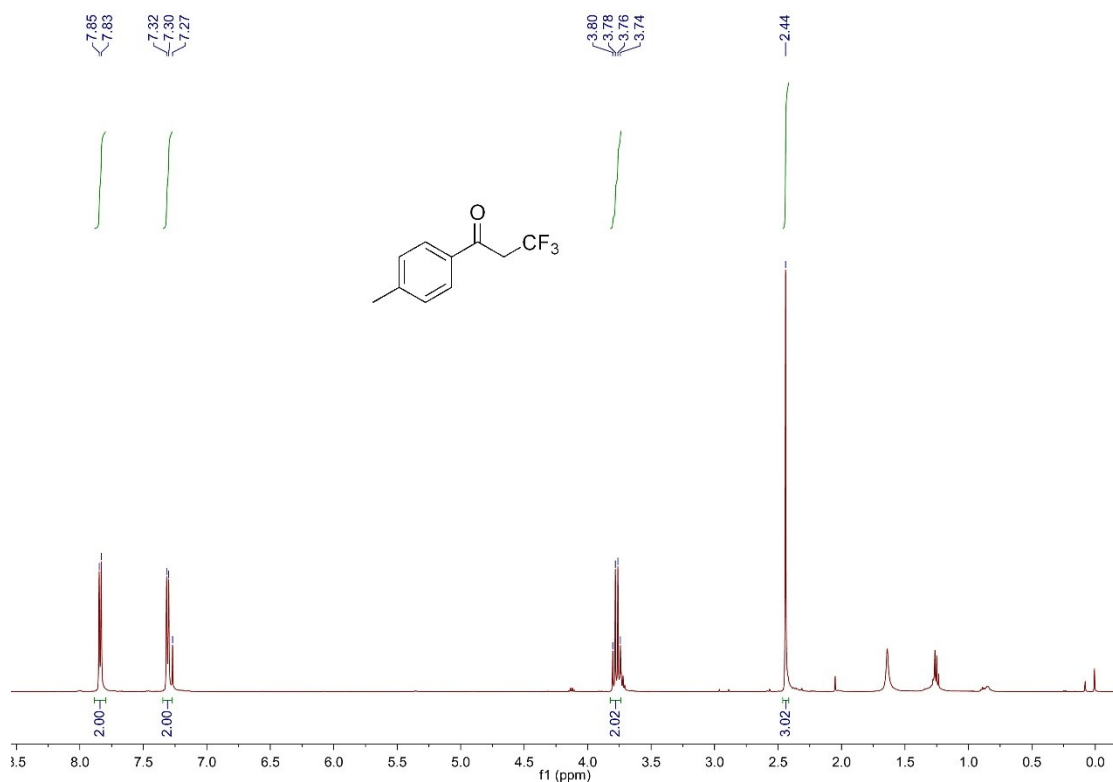

**<sup>1</sup>H NMR 3e**

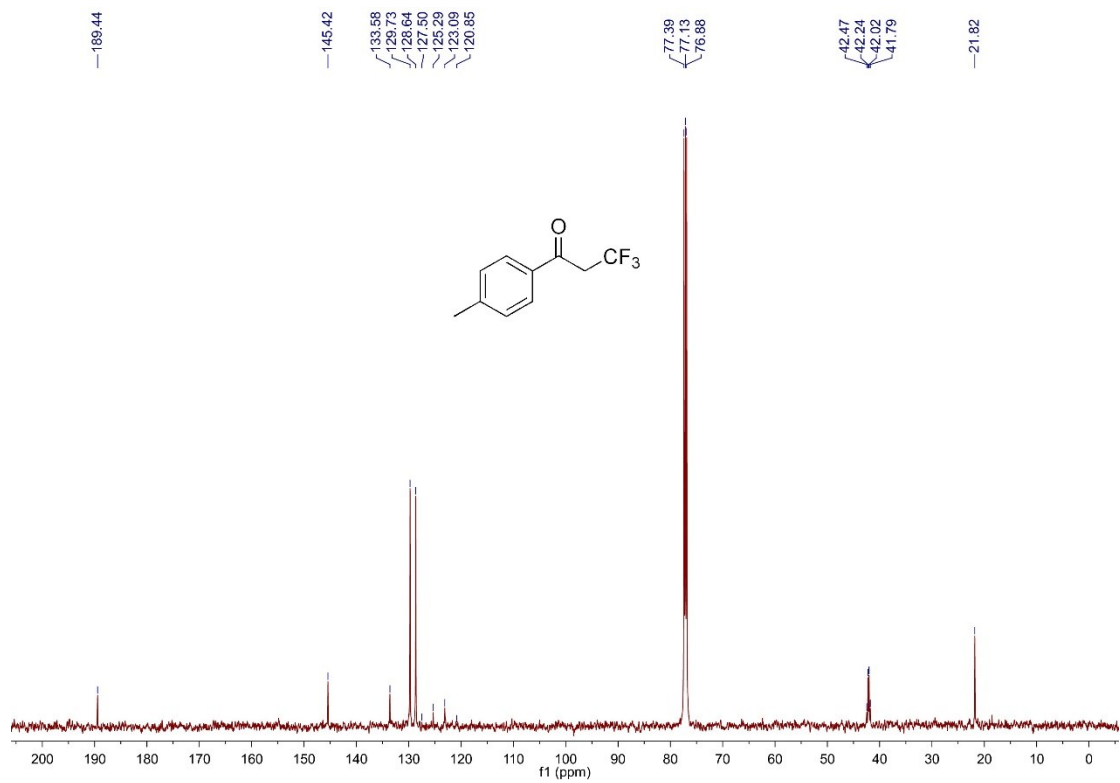

<sup>13</sup>C NMR 3e

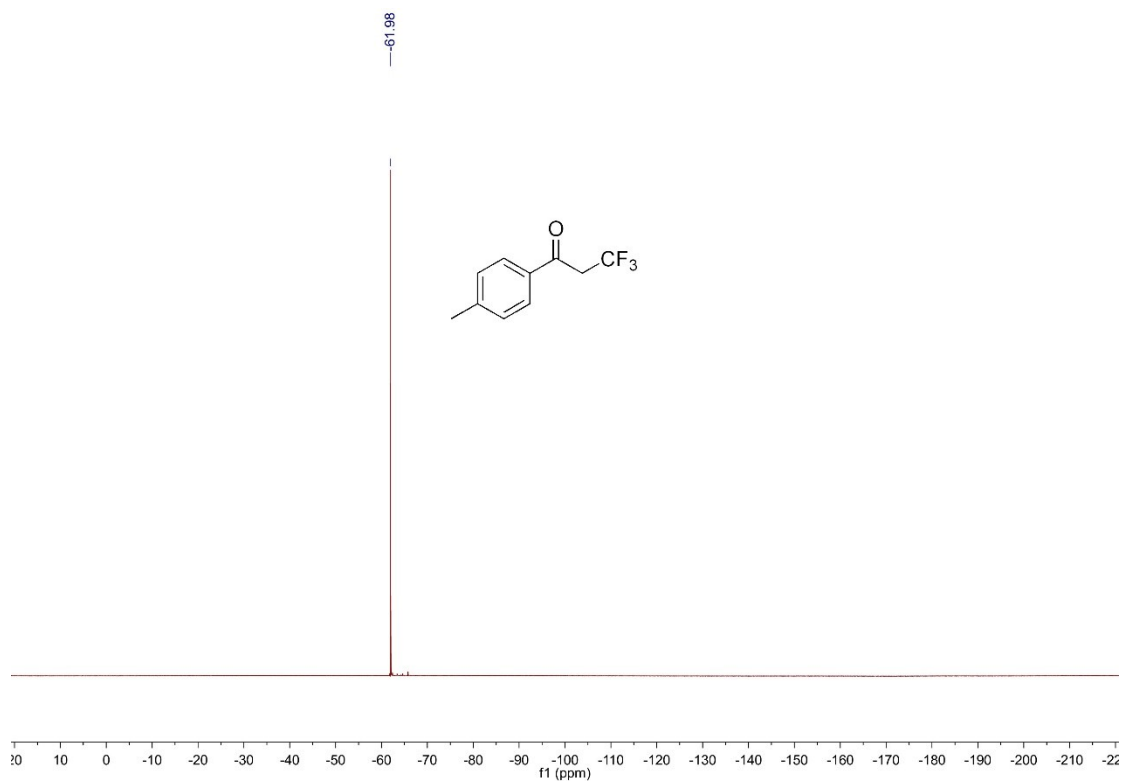

<sup>19</sup>F NMR 3e

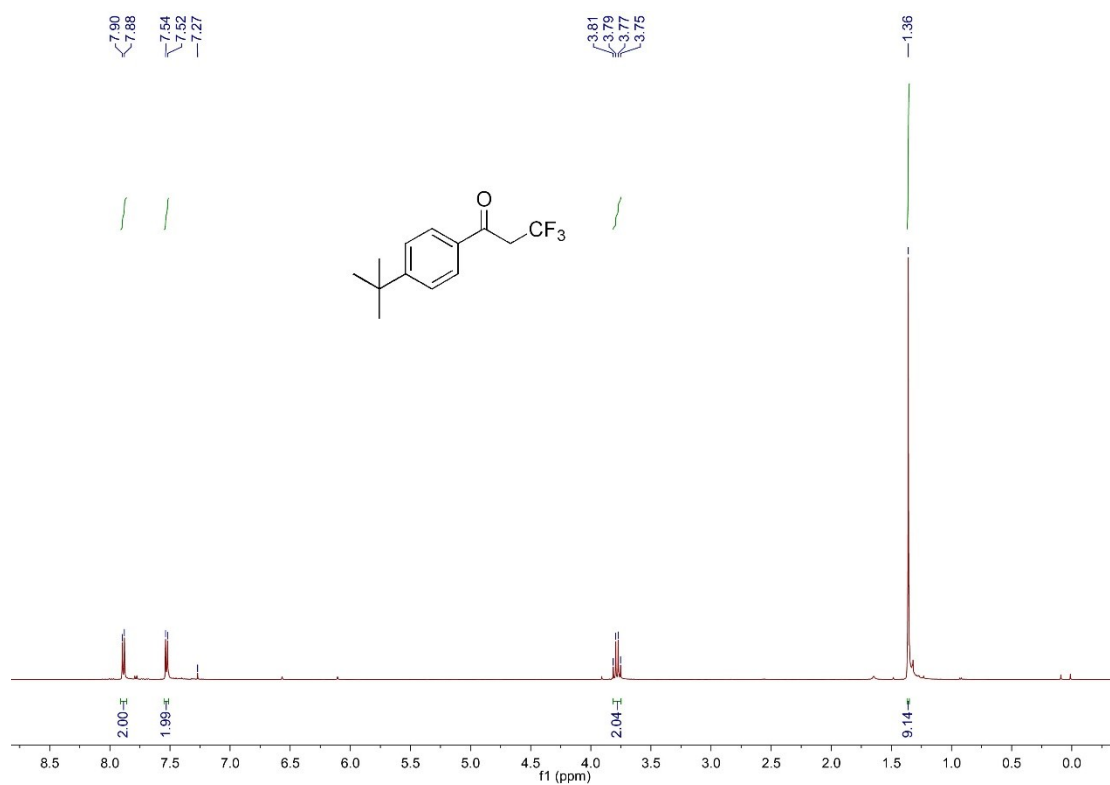

$^1\text{H NMR}$  3f

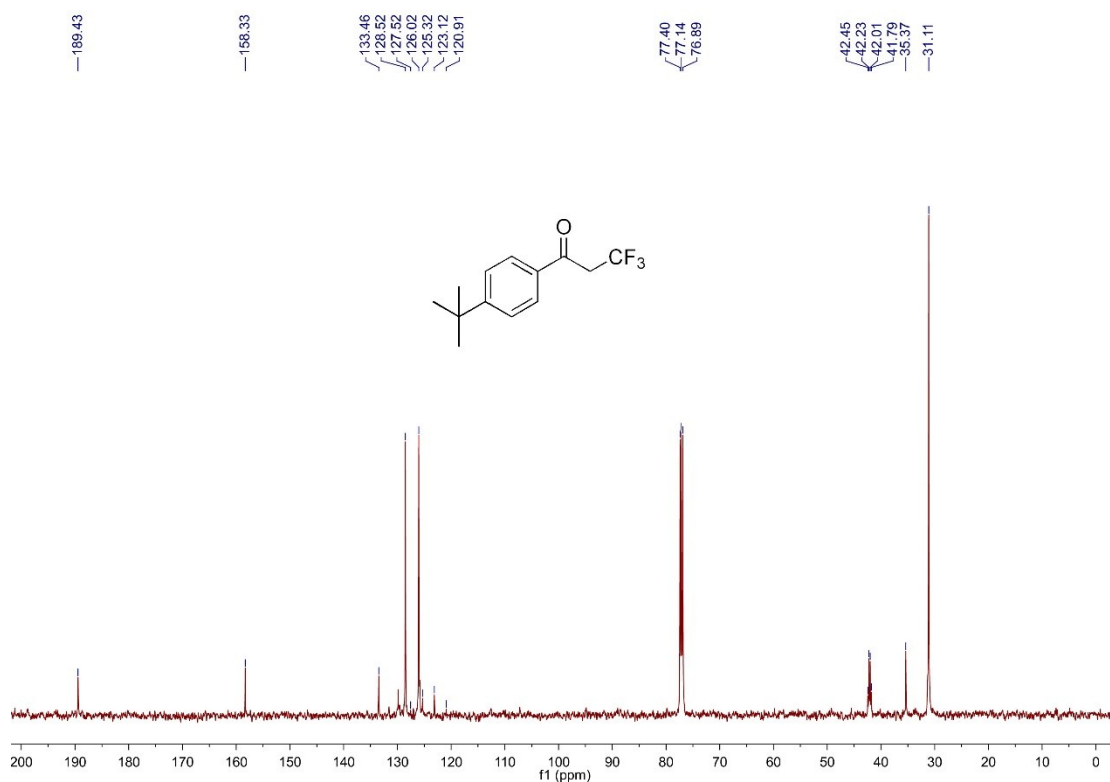

$^{13}\text{C NMR}$  3f

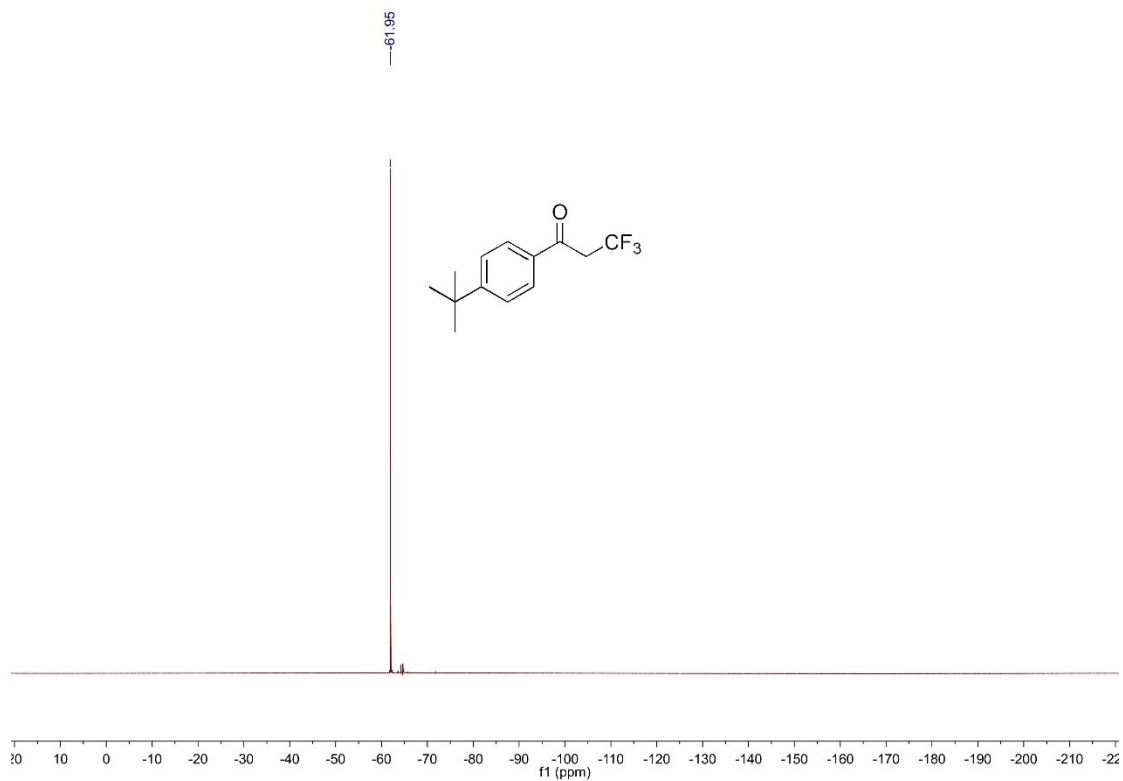

$^{19}\text{F}$  NMR 3f

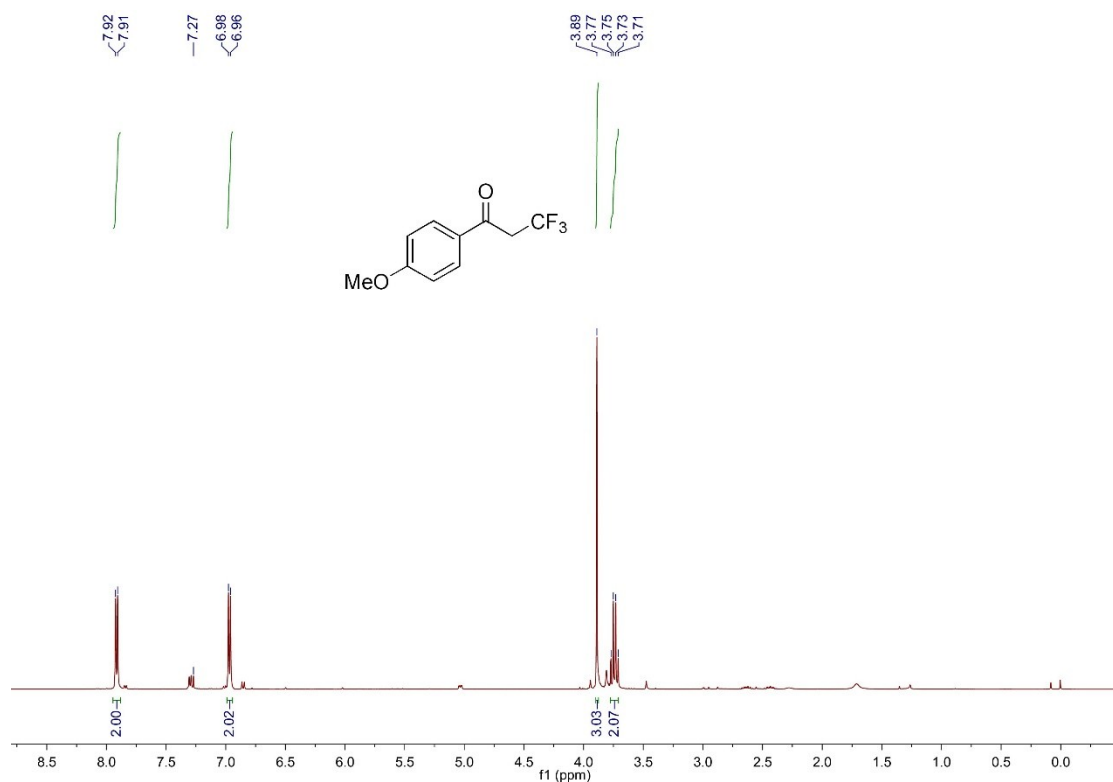

$^1\text{H}$  NMR 3g

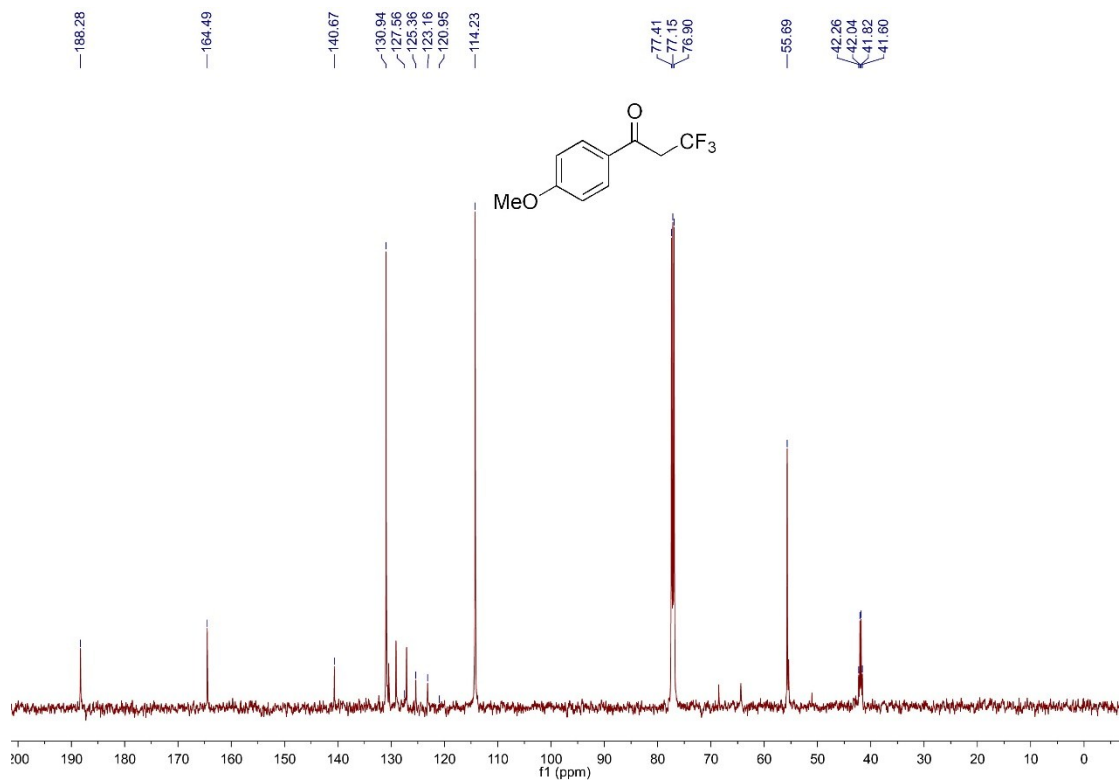

$^{13}\text{C}$  NMR **3g**

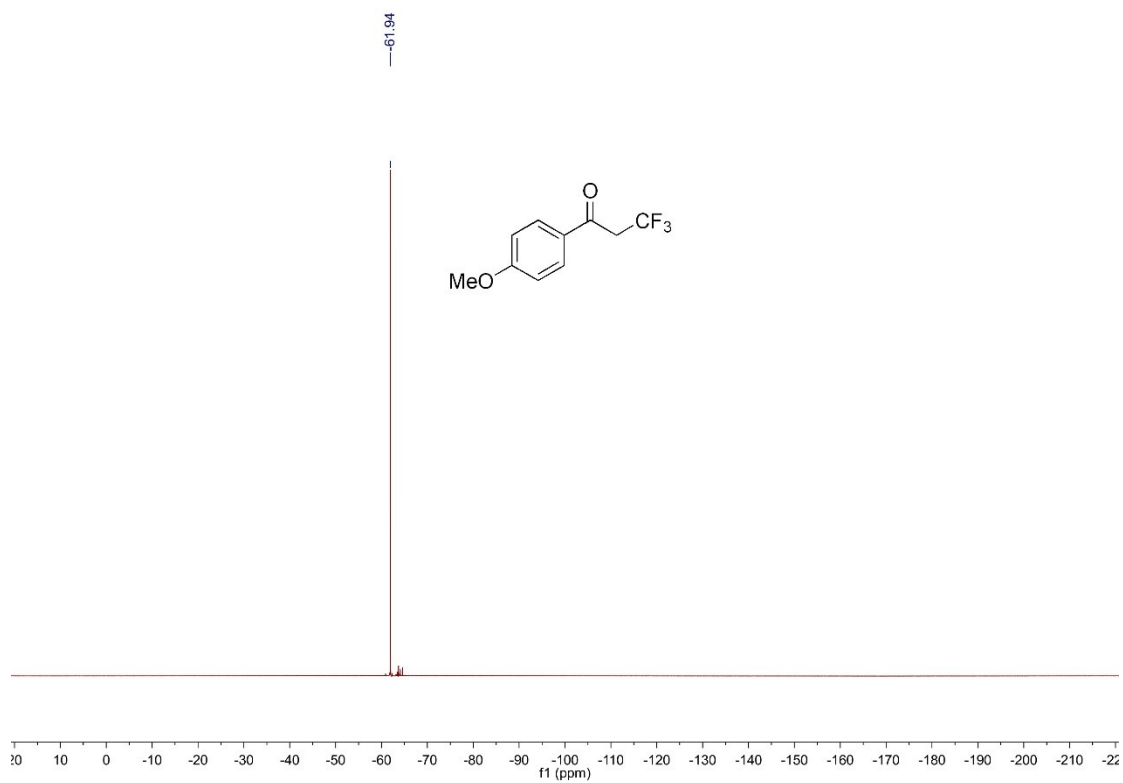

$^{19}\text{F}$  NMR **3g**

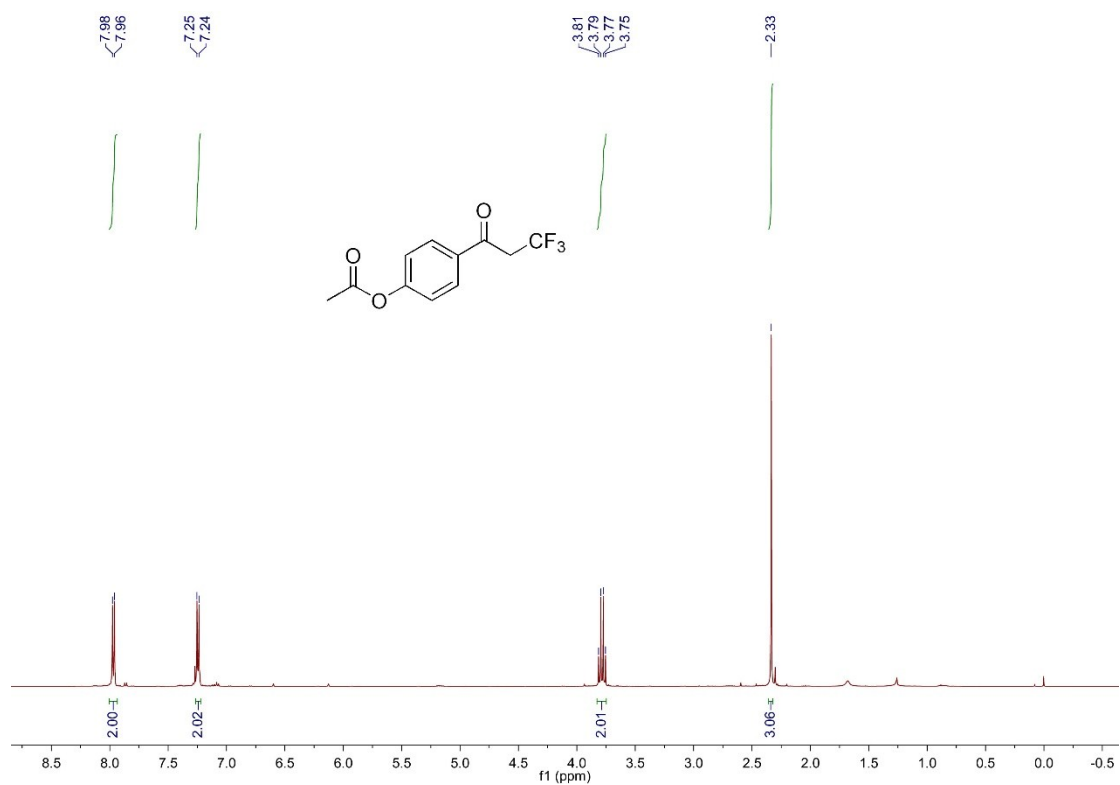

<sup>1</sup>H NMR 3h

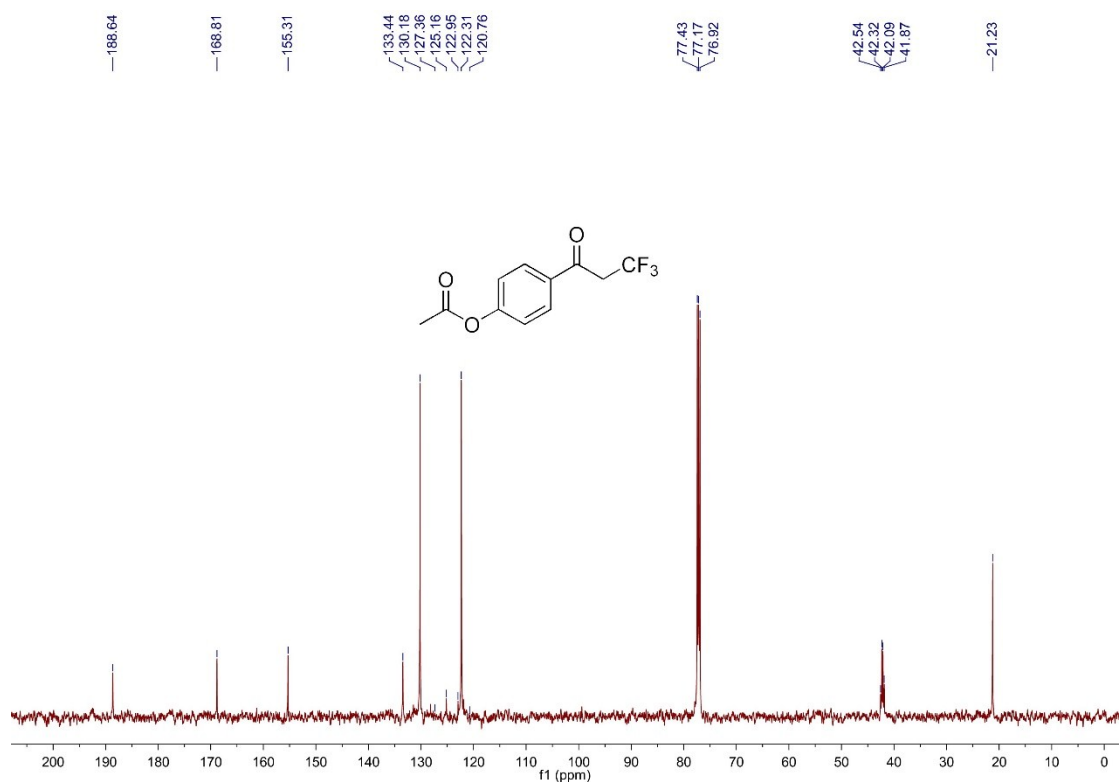

<sup>13</sup>C NMR 3h



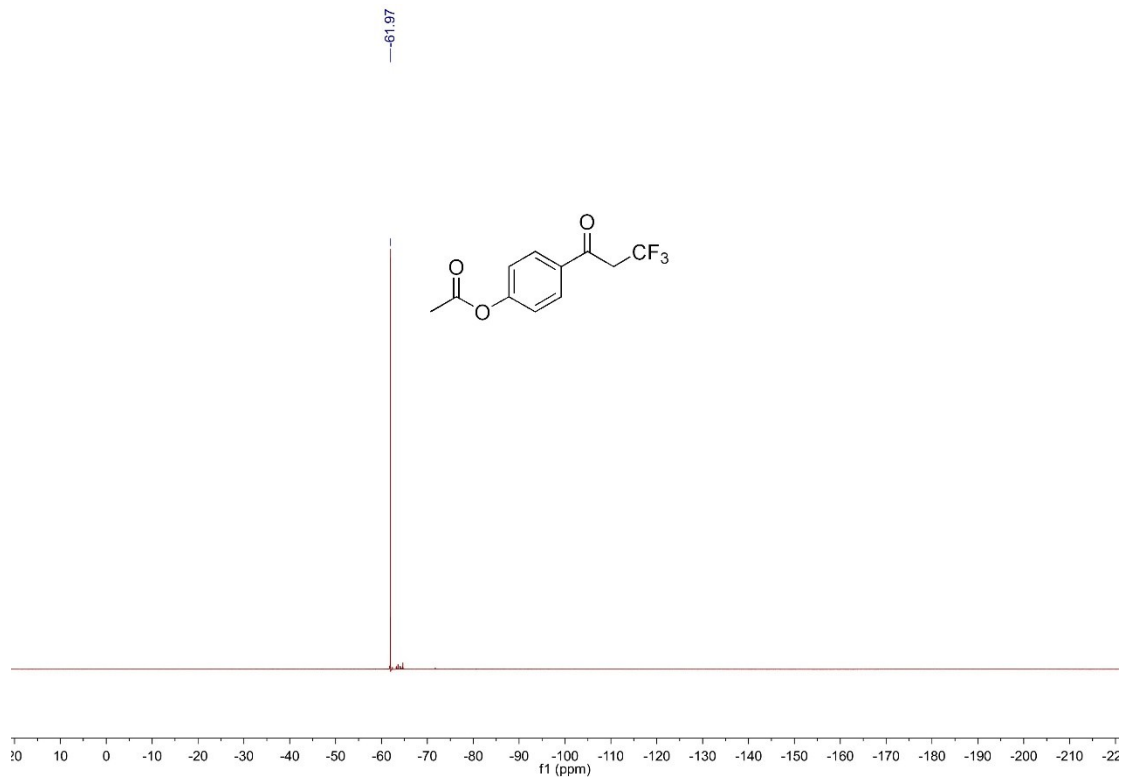

<sup>19</sup>F NMR 3h

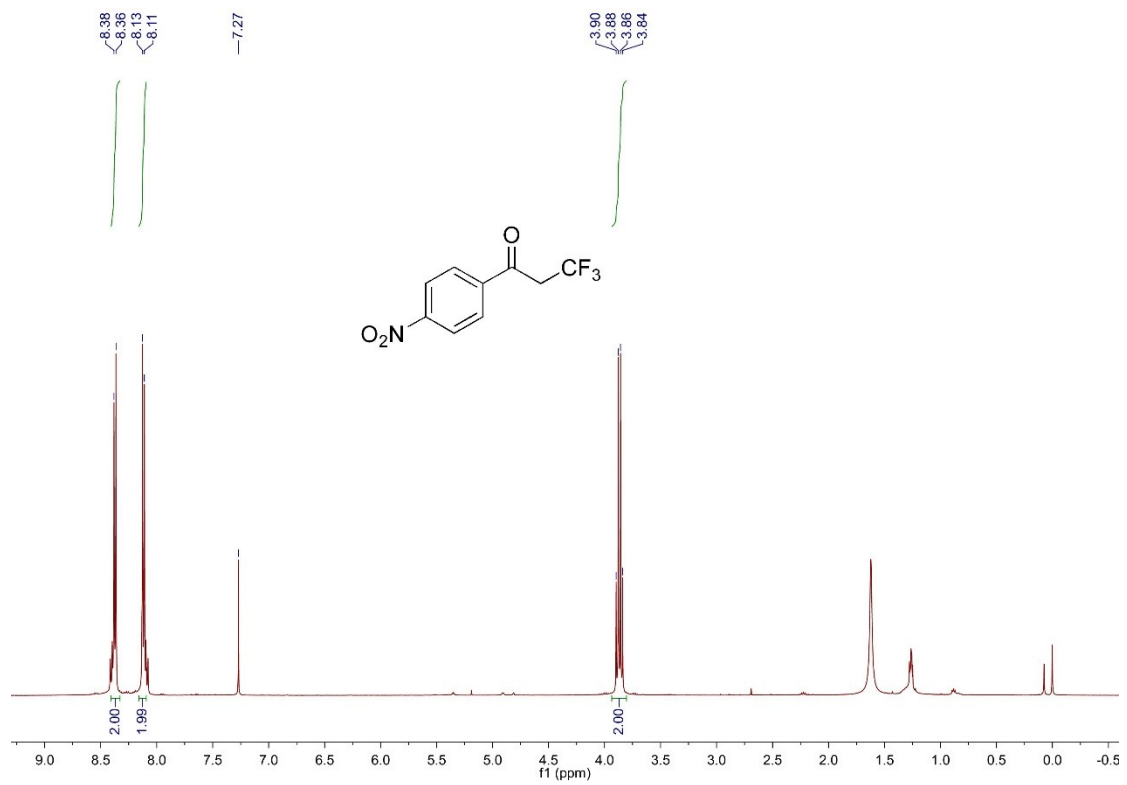

<sup>1</sup>H NMR 3i

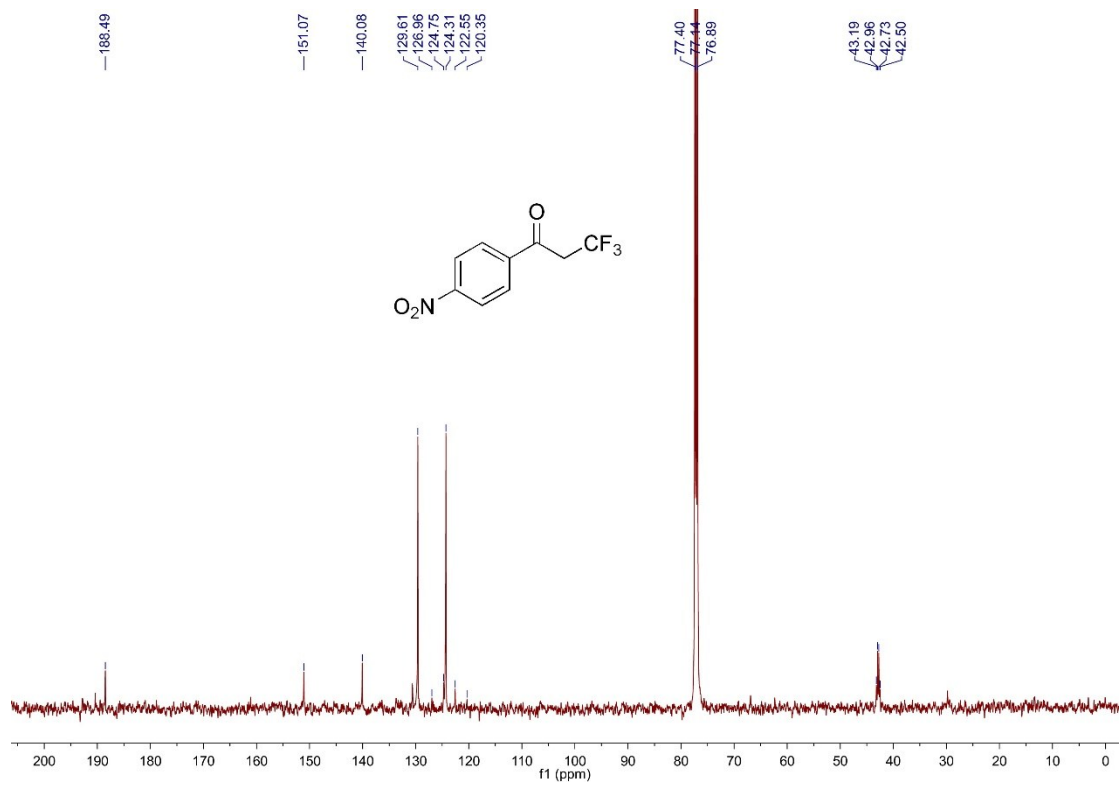

<sup>13</sup>C NMR 3i

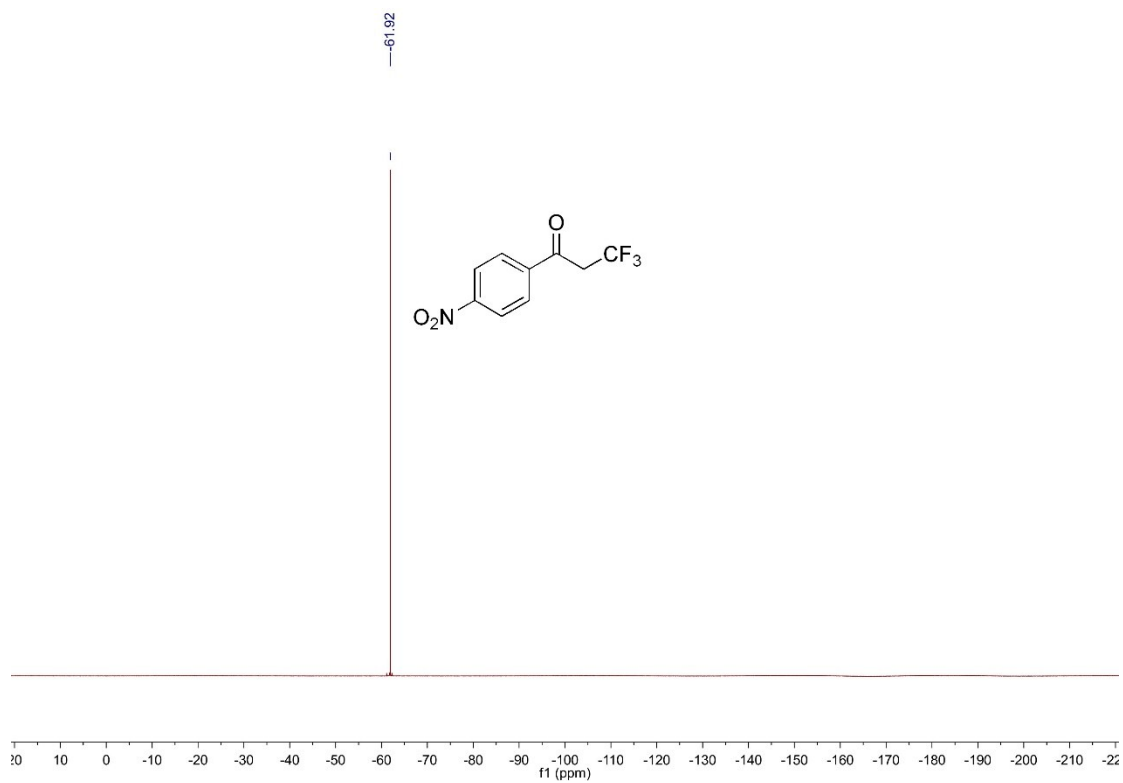

<sup>19</sup>F NMR 3i

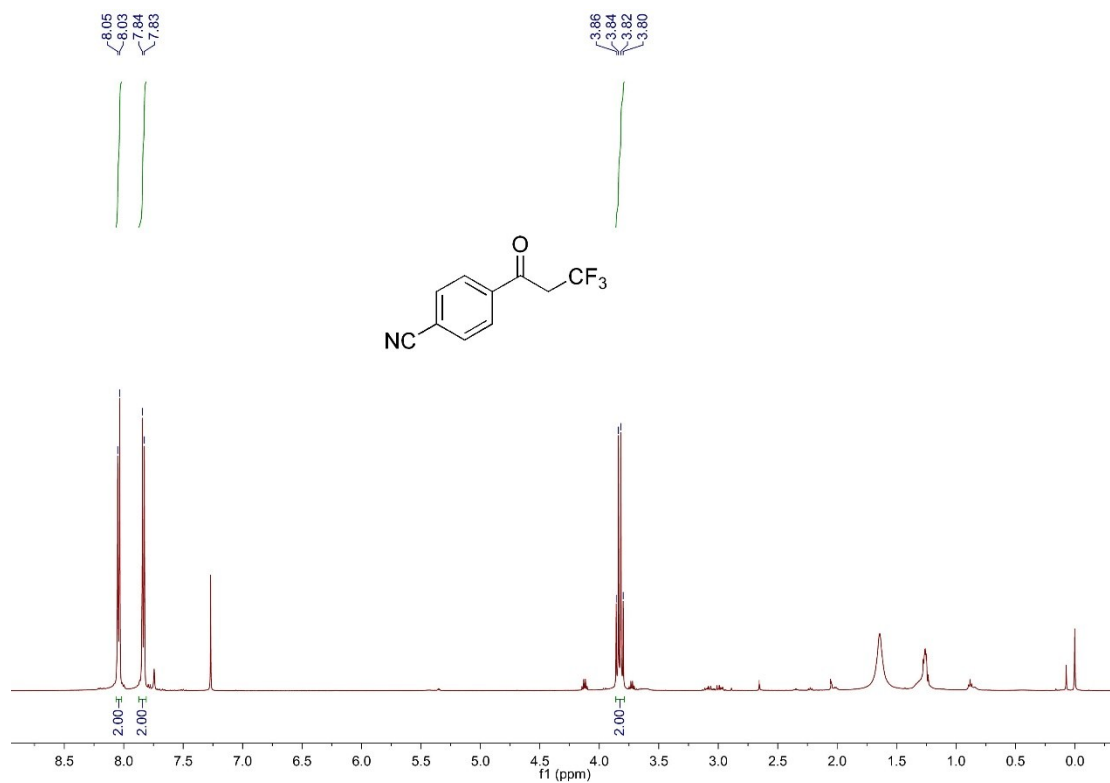

<sup>1</sup>H NMR 3j

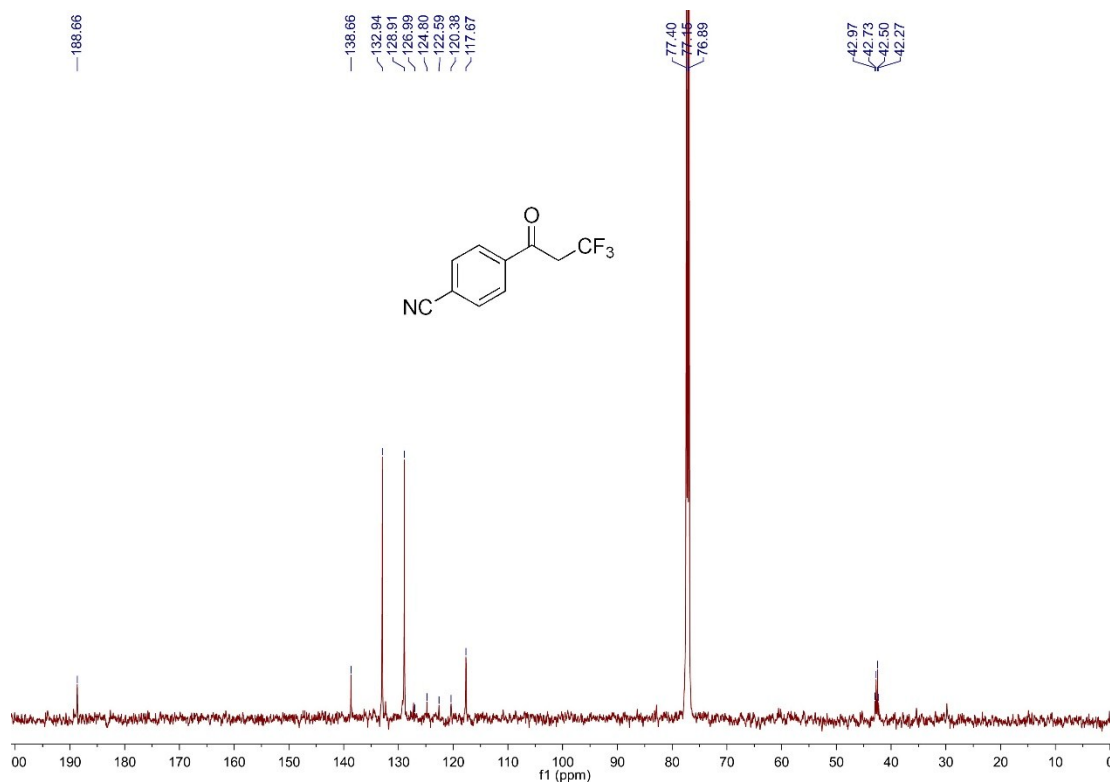

<sup>13</sup>C NMR 3j

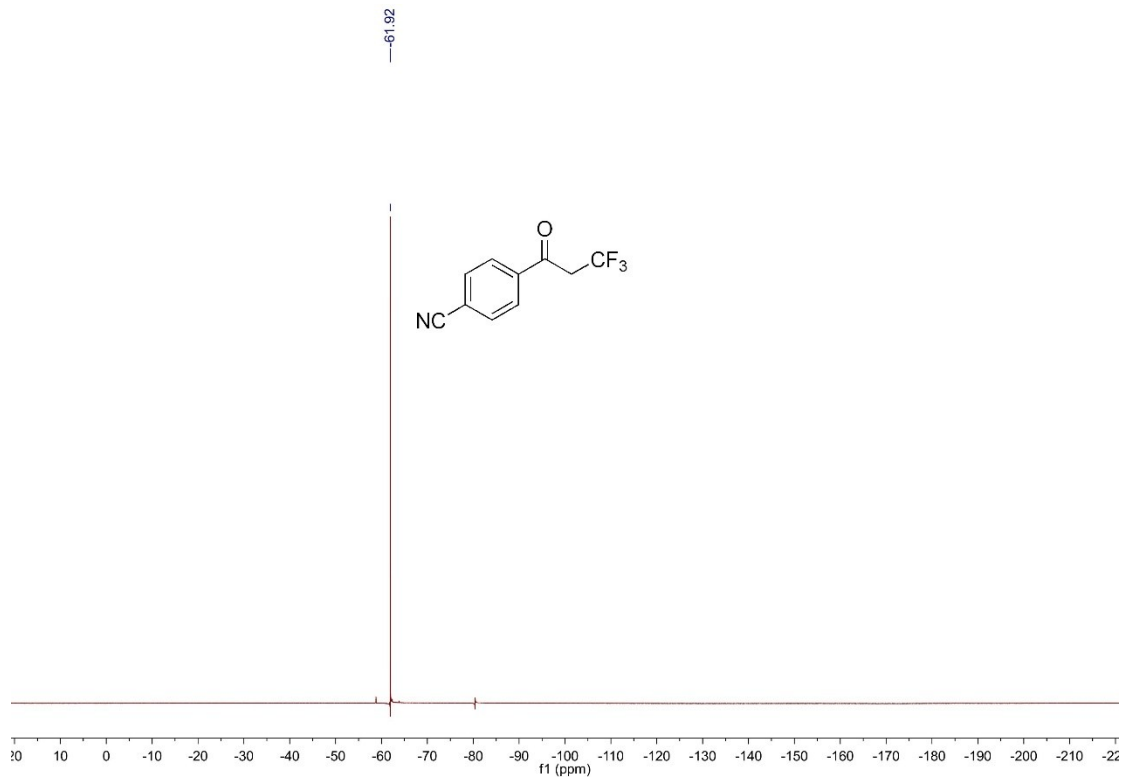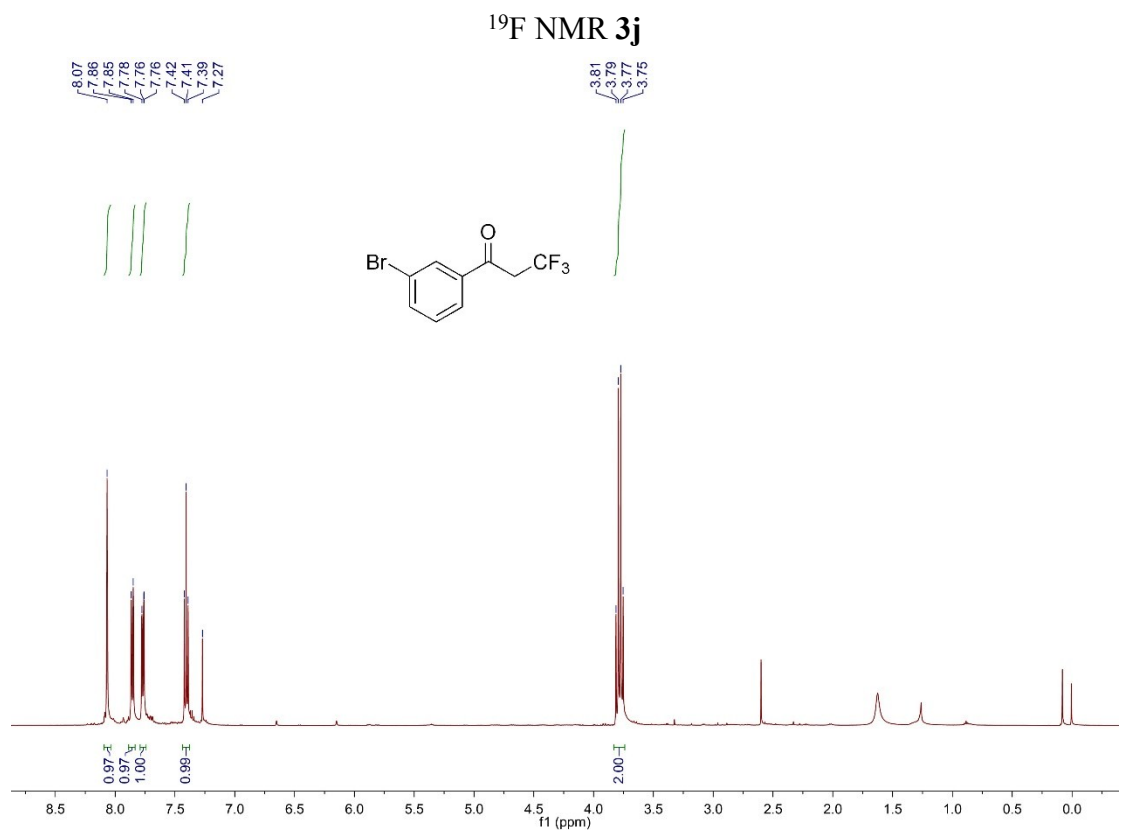

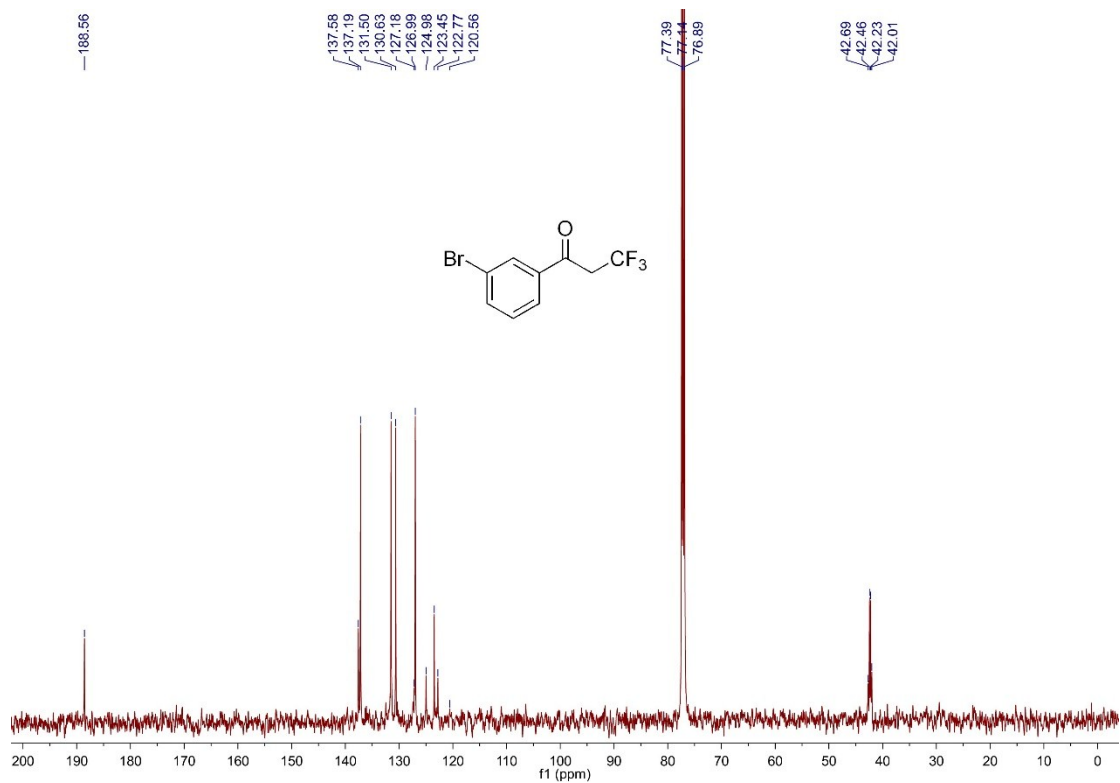

<sup>13</sup>C NMR 3k

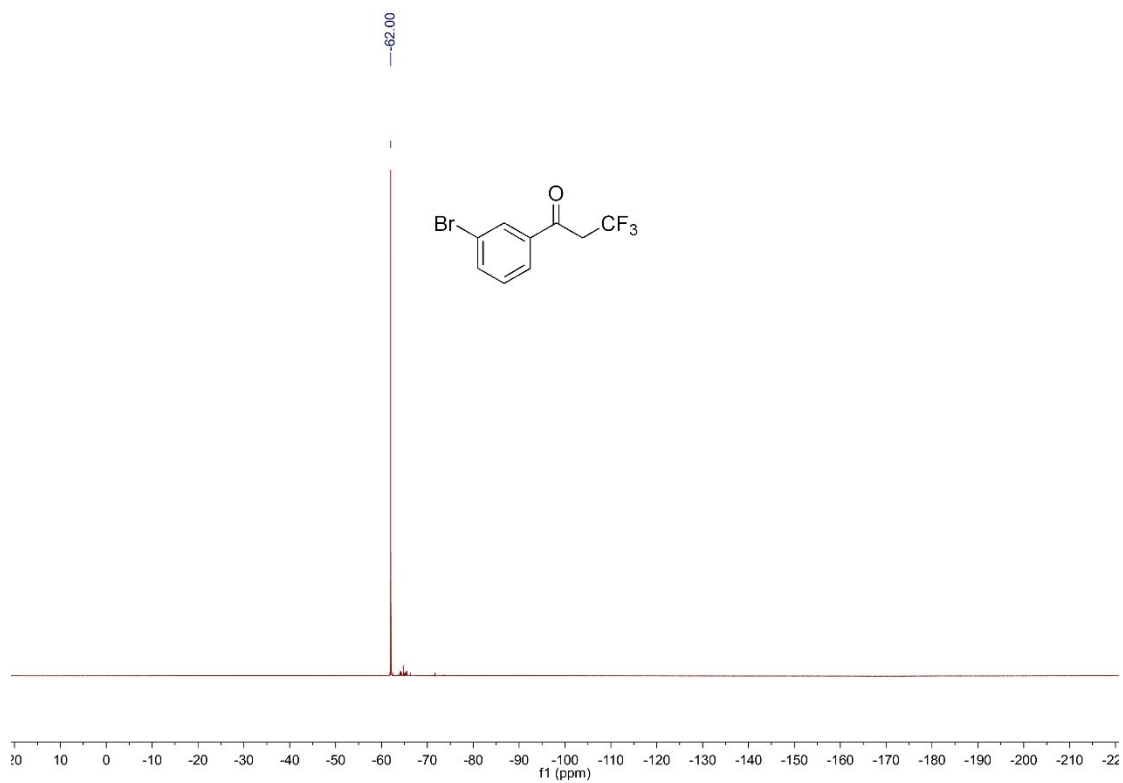

<sup>19</sup>F NMR 3k

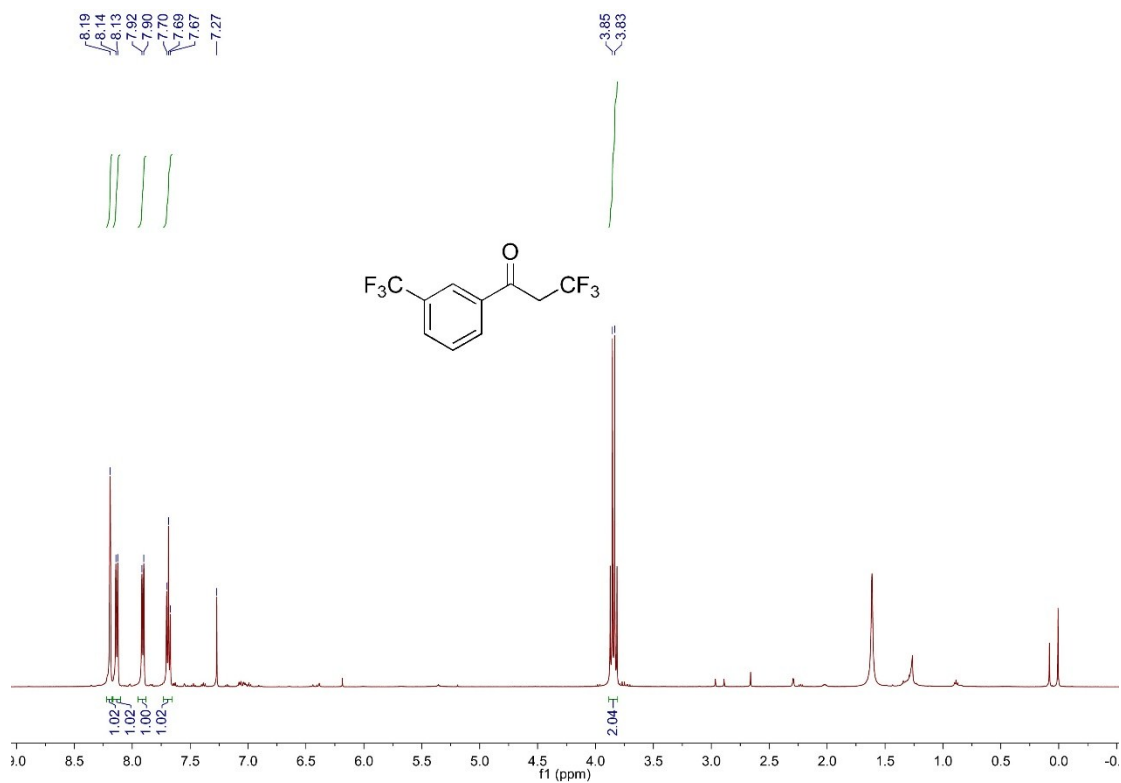

<sup>1</sup>H NMR 31

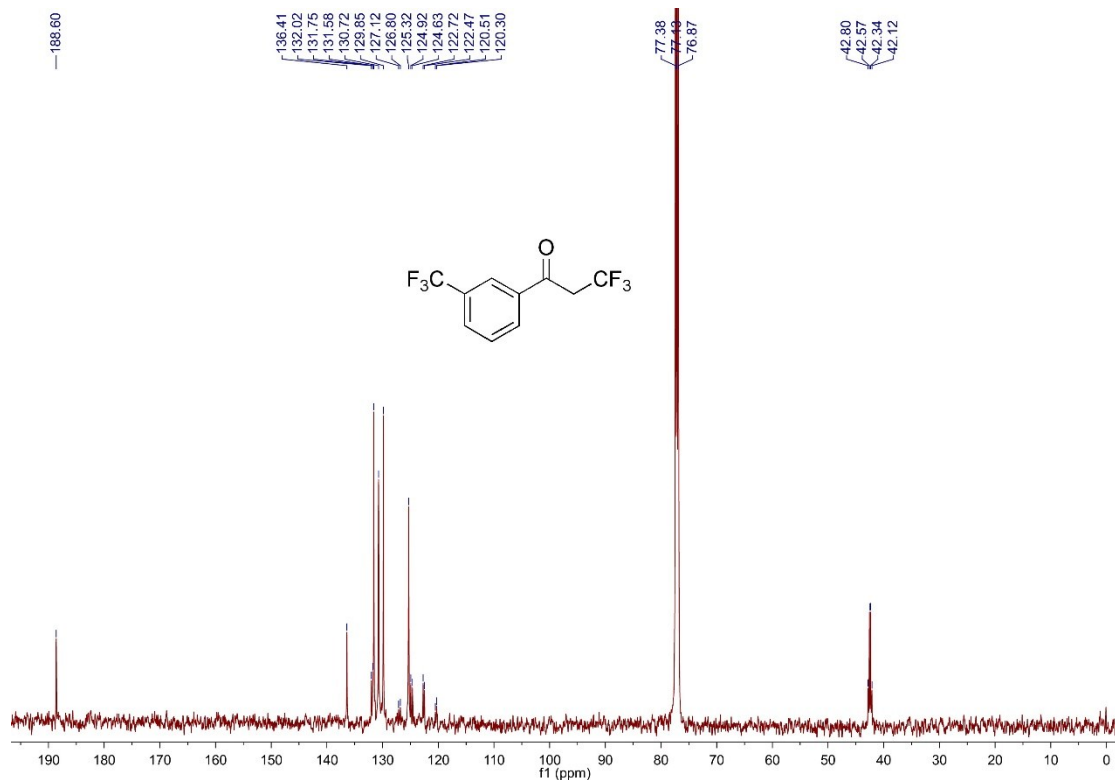

<sup>13</sup>C NMR 31

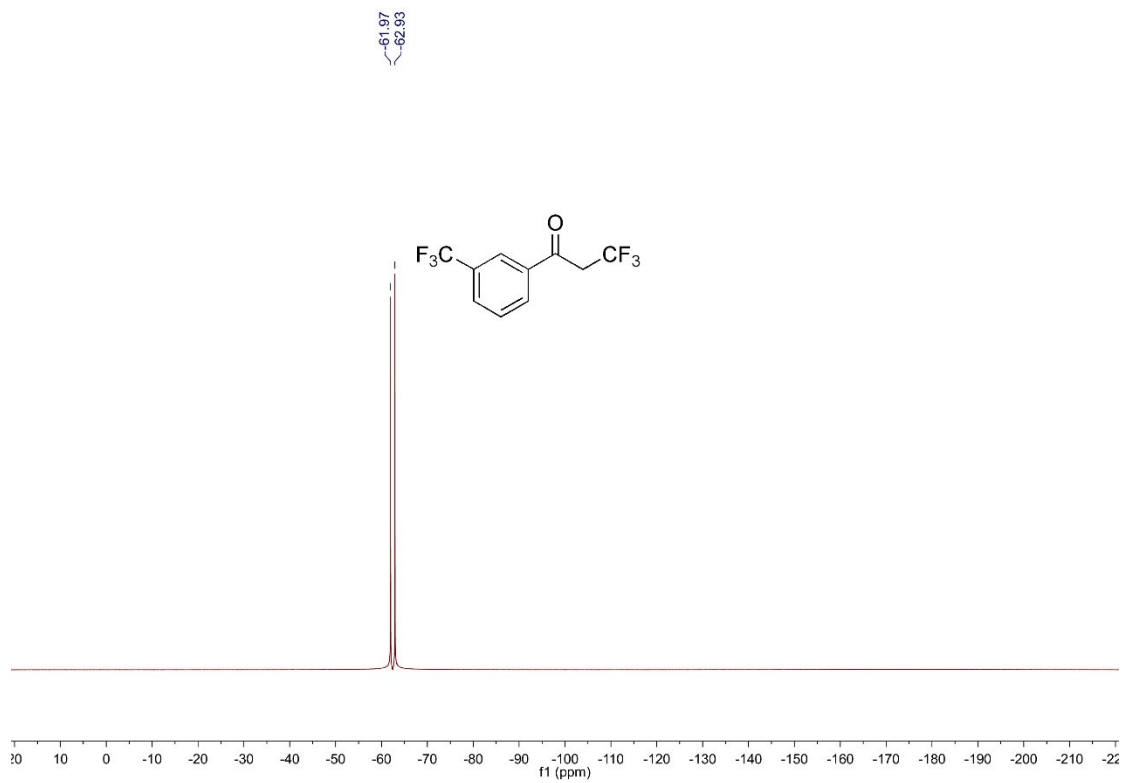

**<sup>19</sup>F NMR 3l**

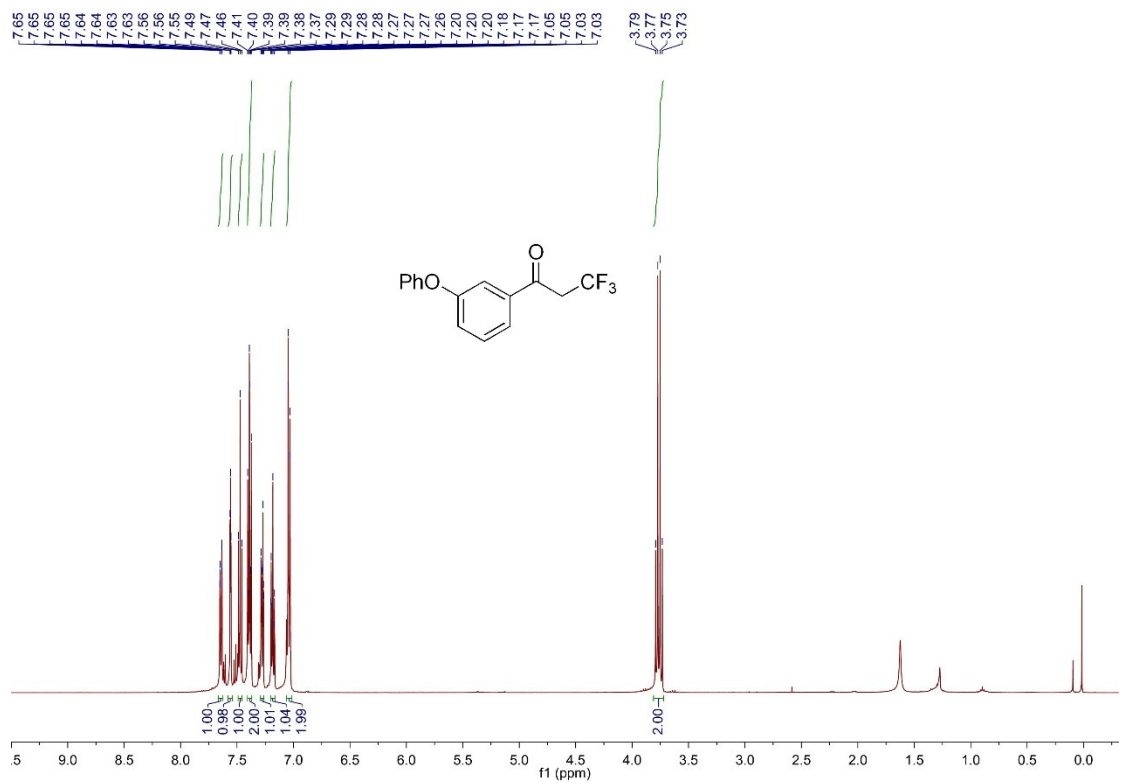

**<sup>1</sup>H NMR 3m**

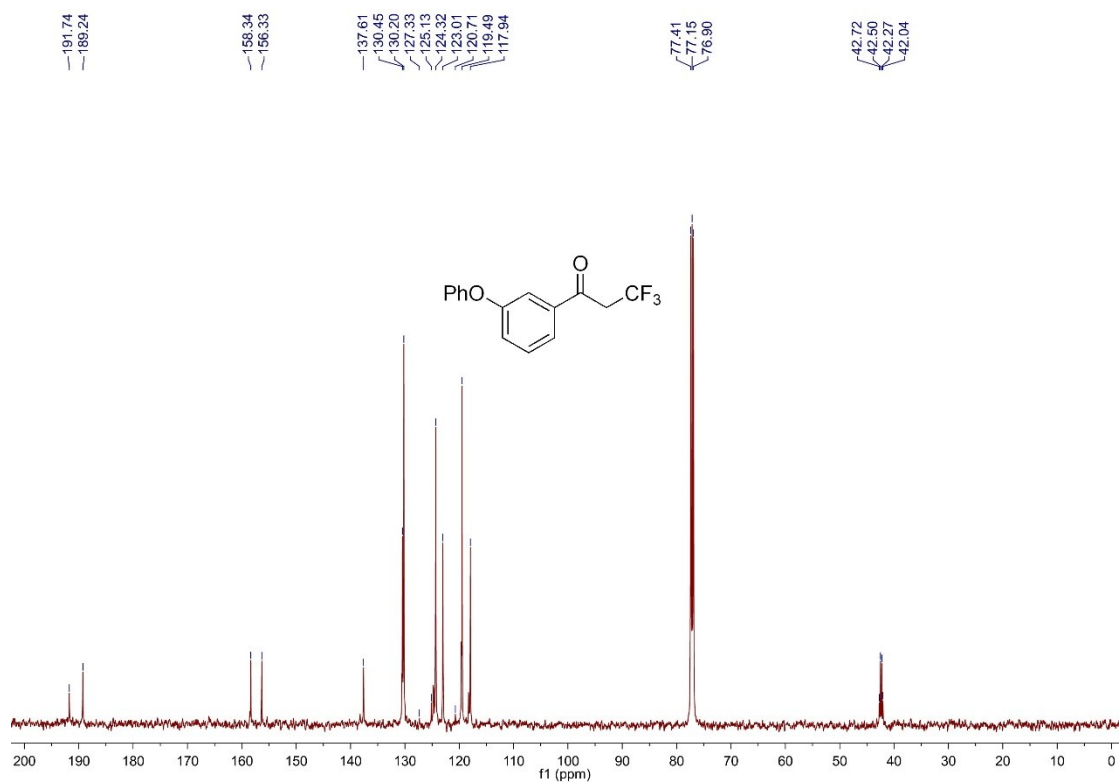

$^{13}\text{C}$  NMR **3m**

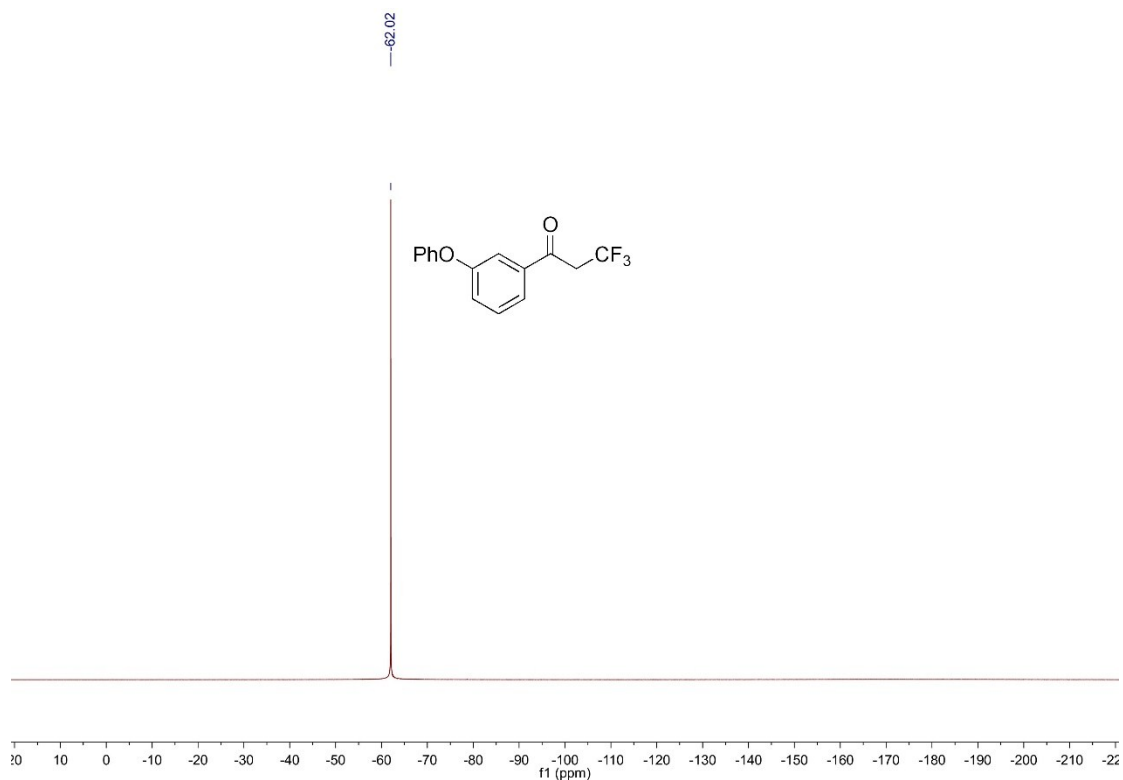

$^{19}\text{F}$  NMR **3m**



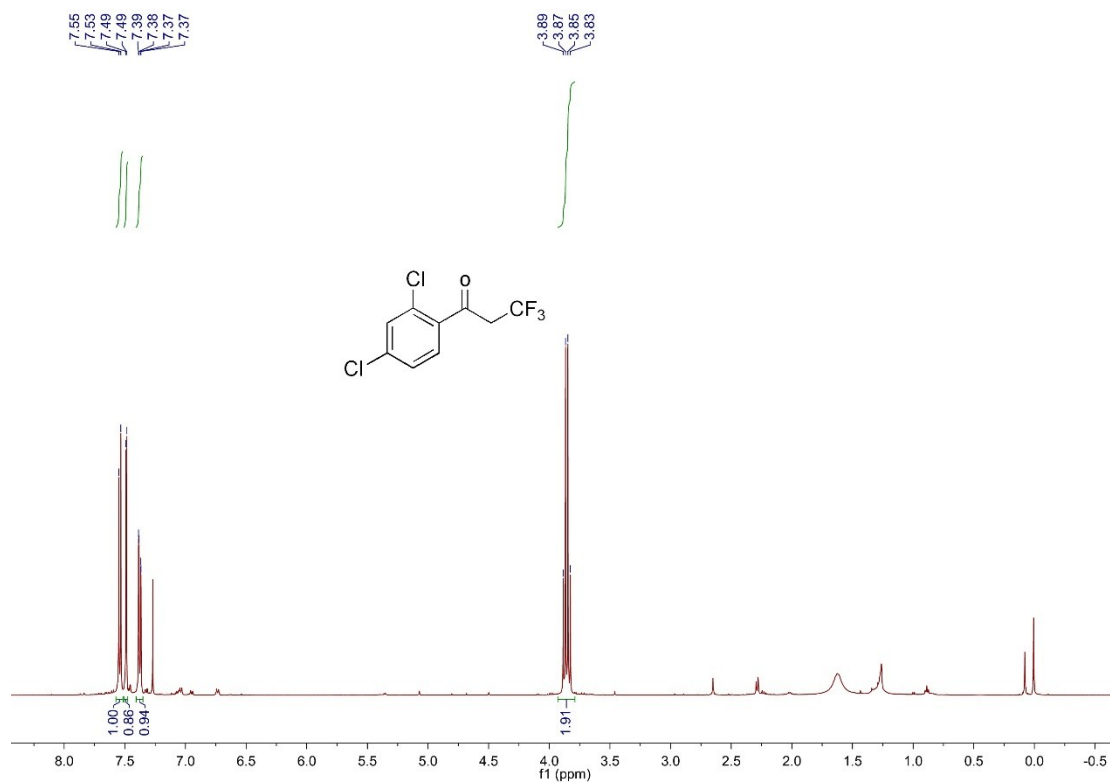

<sup>1</sup>H NMR 3n

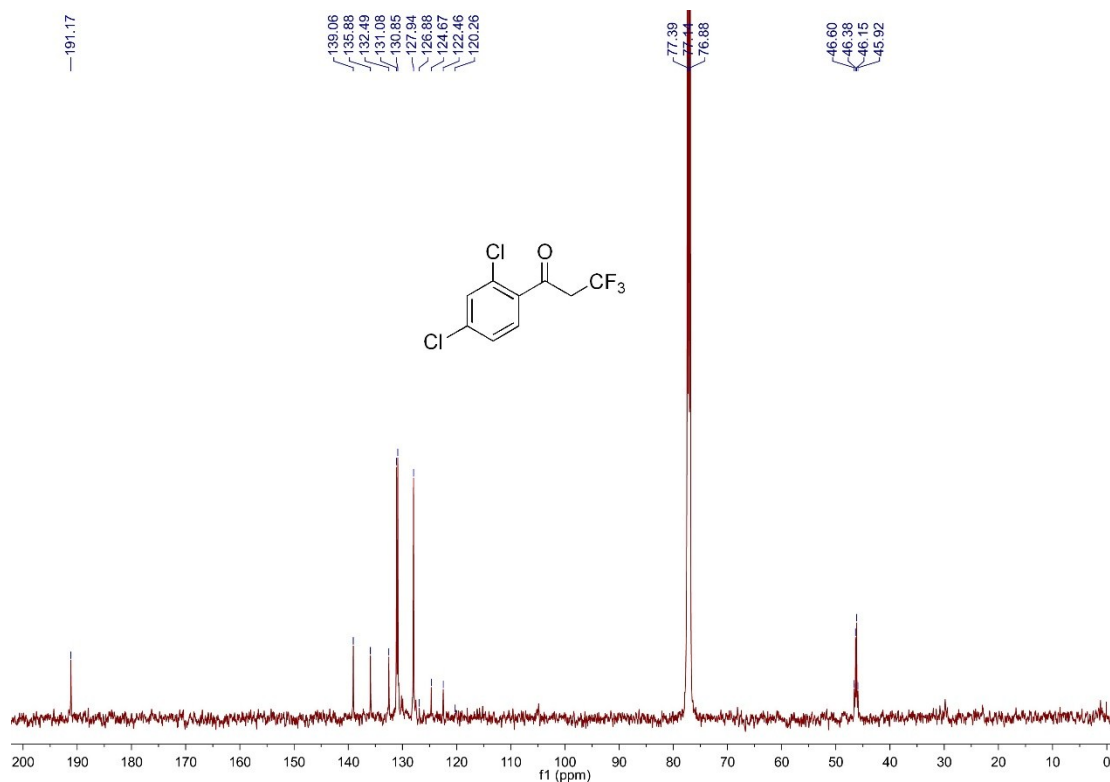

<sup>13</sup>C NMR 3n

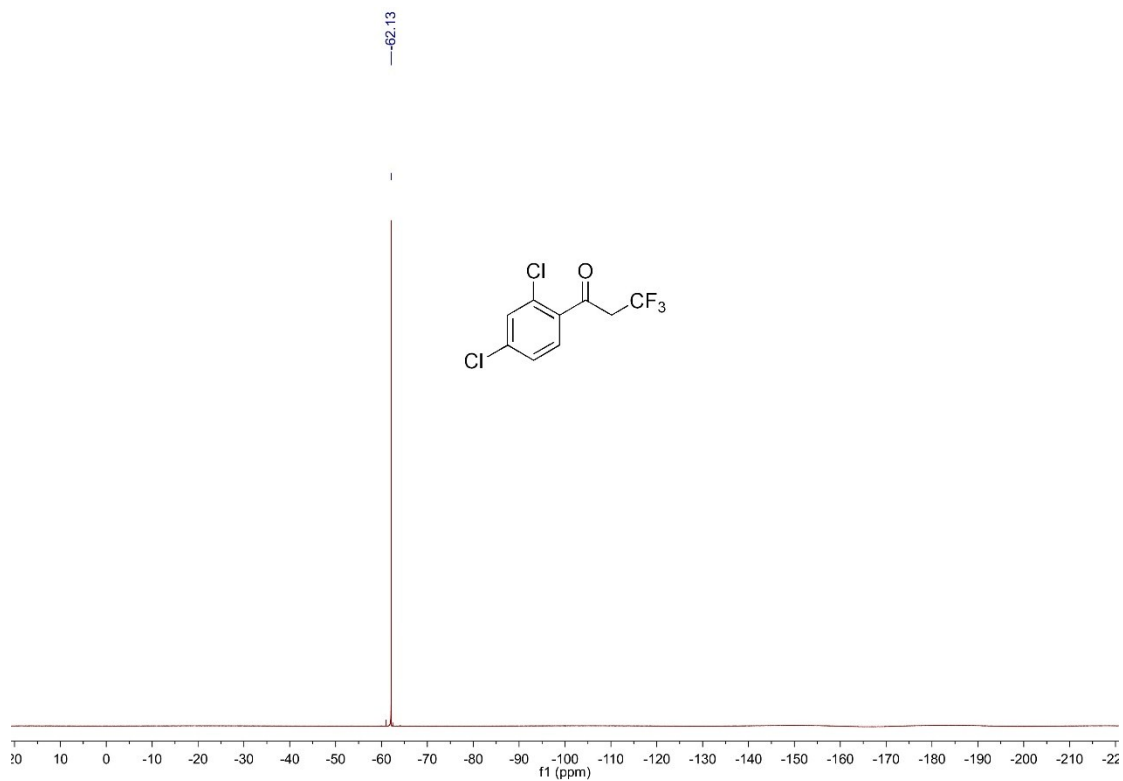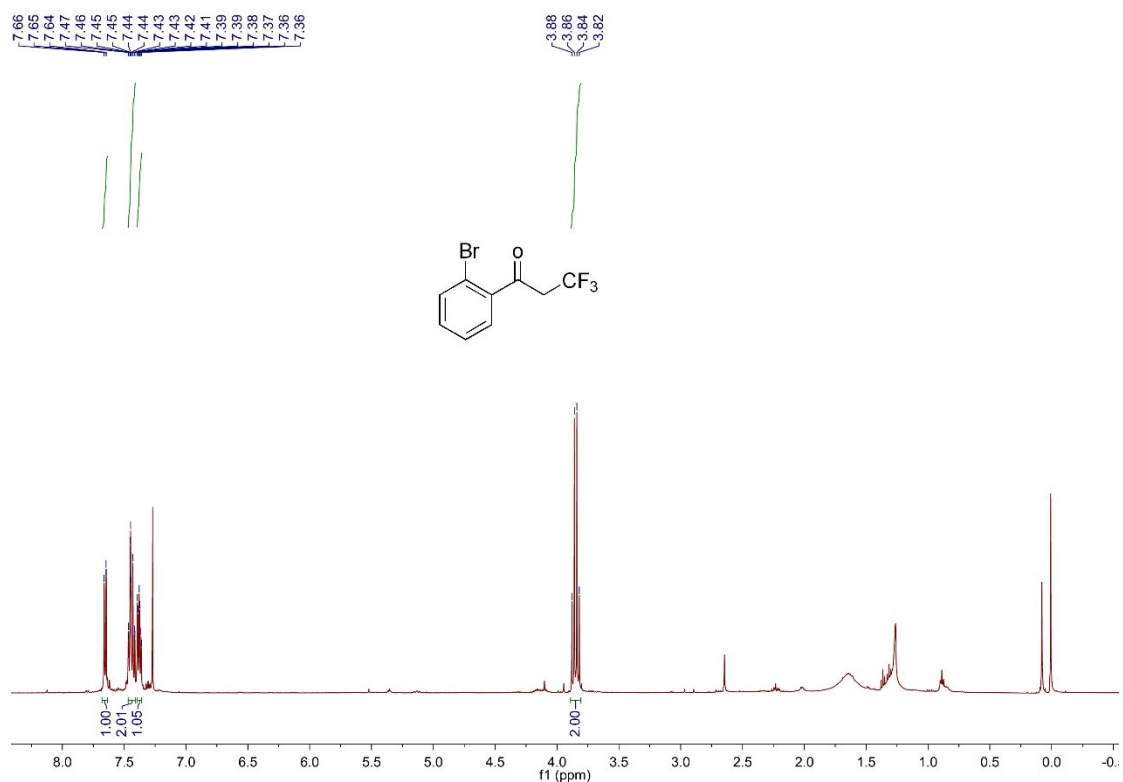

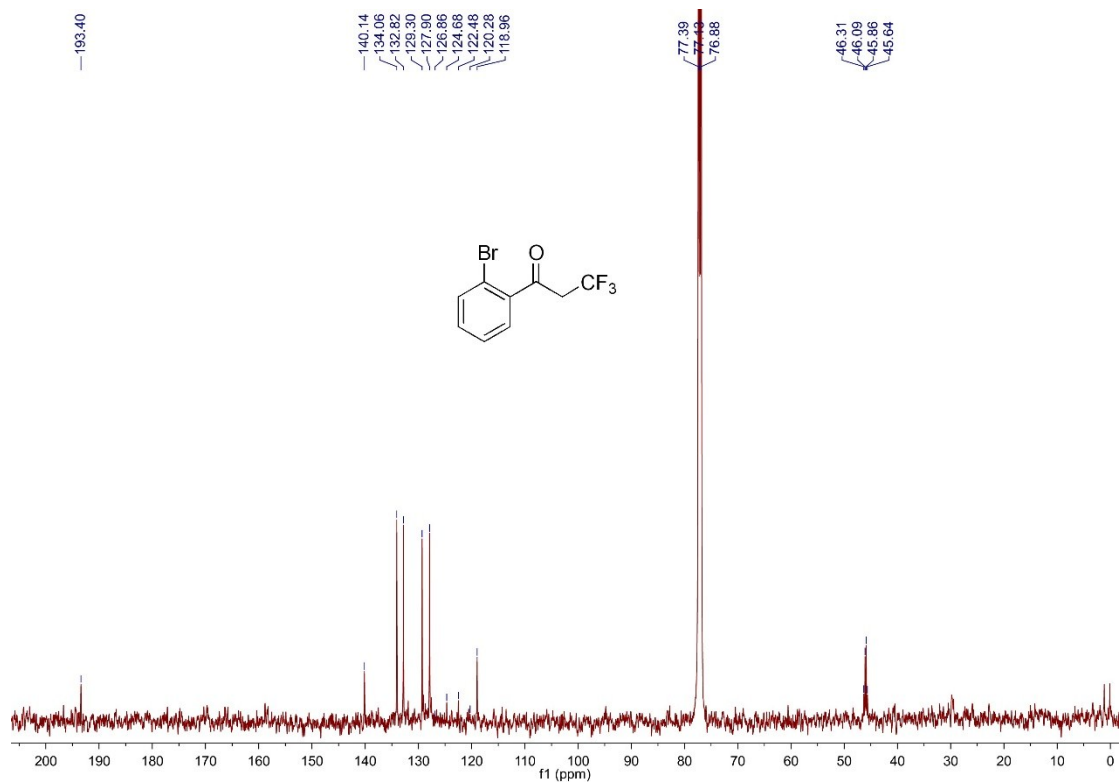

<sup>13</sup>C NMR 3o

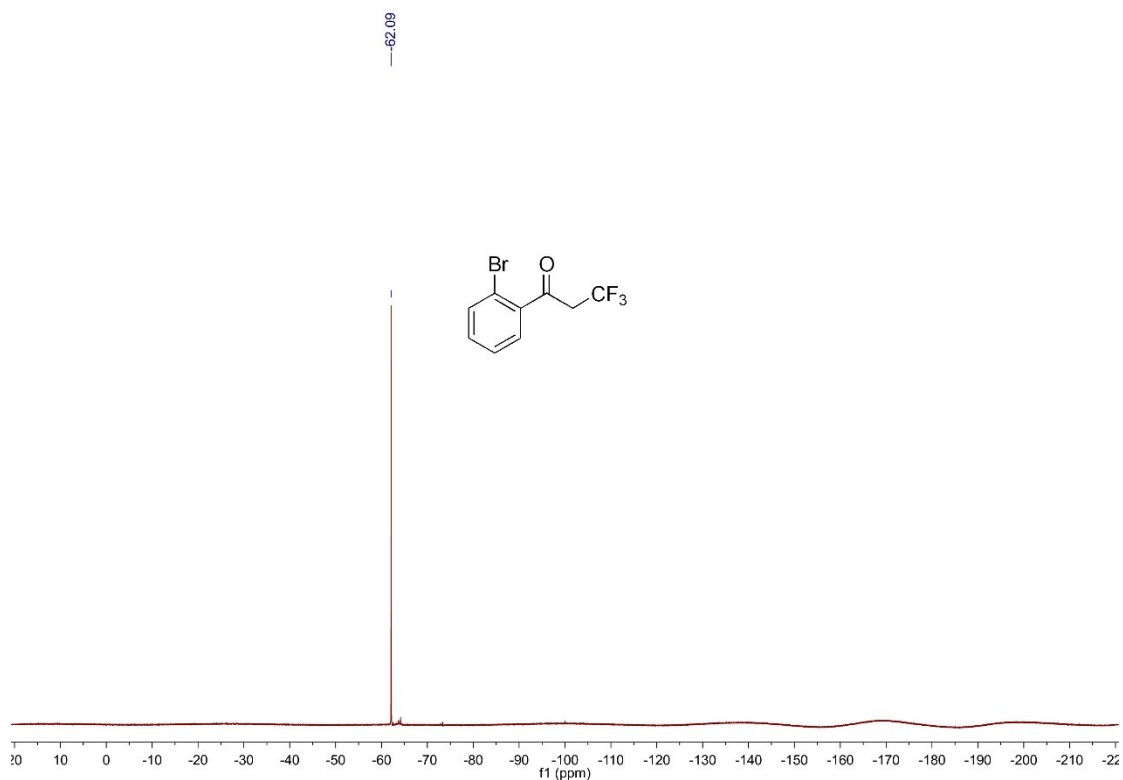

<sup>19</sup>F NMR 3o

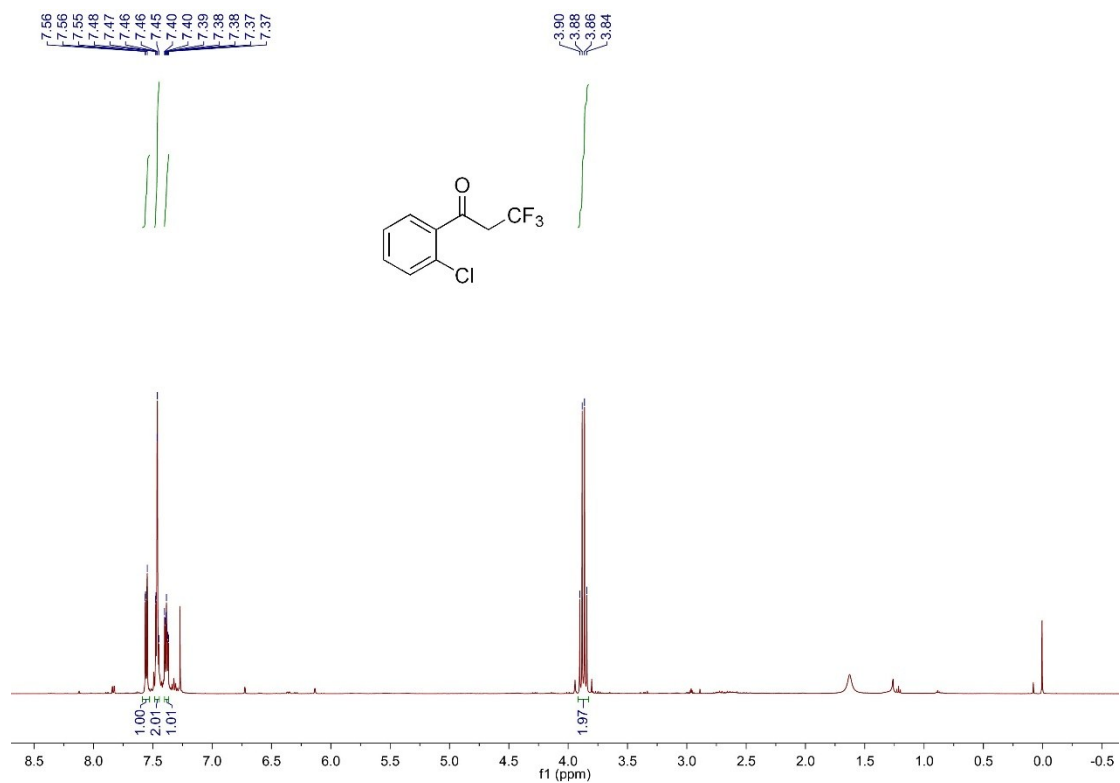

<sup>1</sup>H NMR 3p

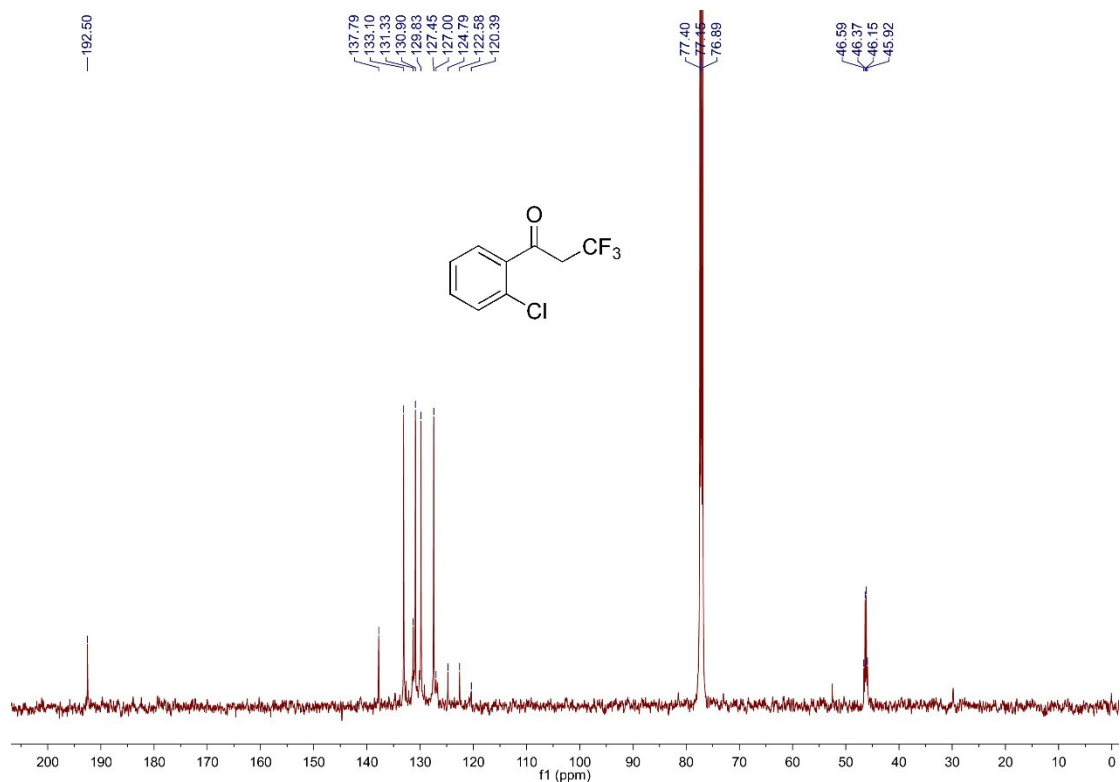

<sup>13</sup>C NMR 3p

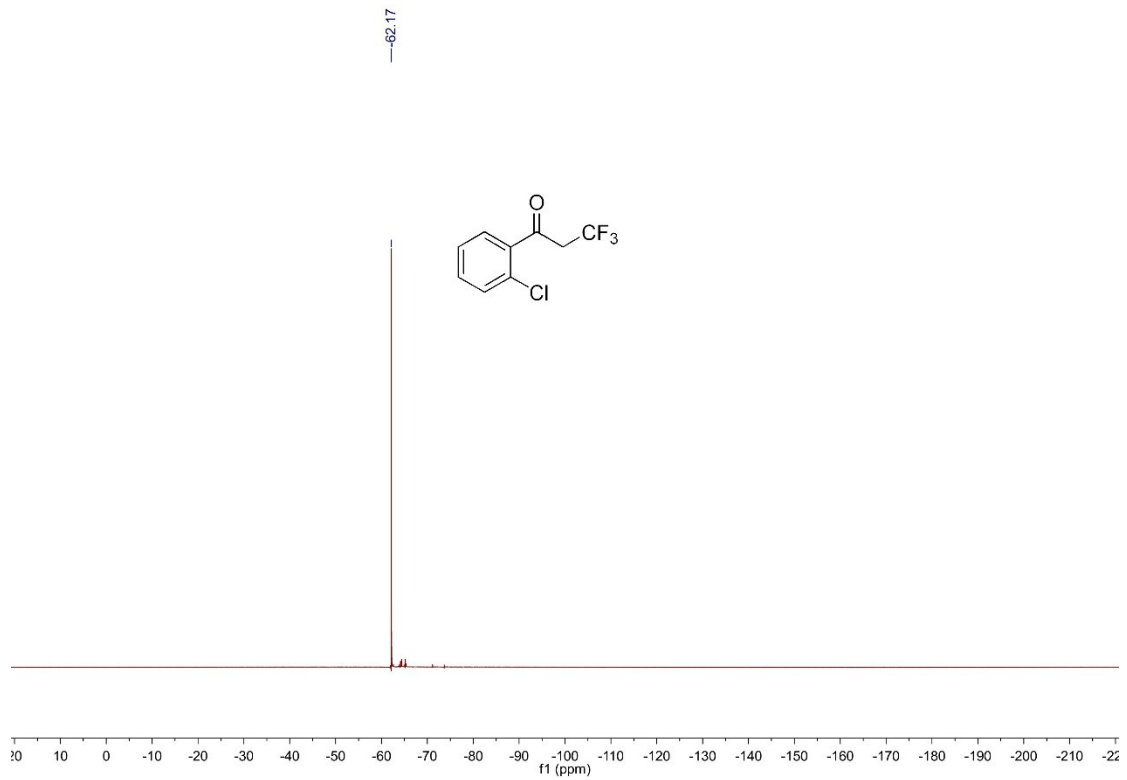

<sup>19</sup>F NMR 3p

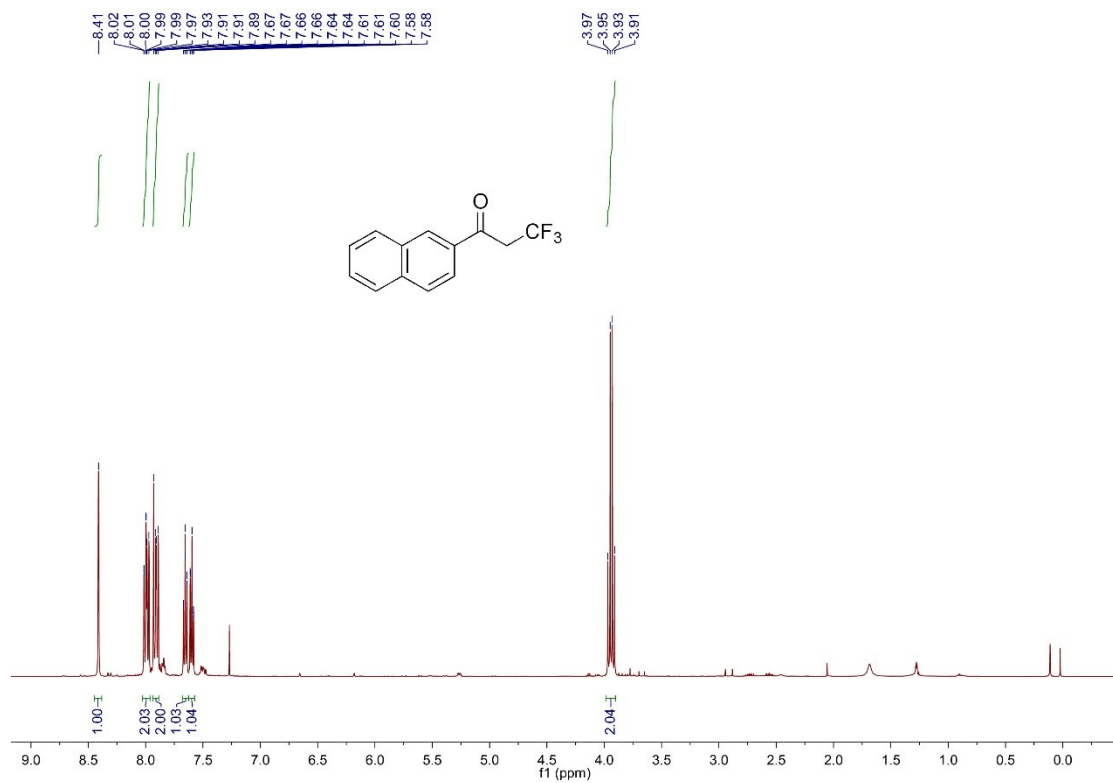

<sup>1</sup>H NMR 3q

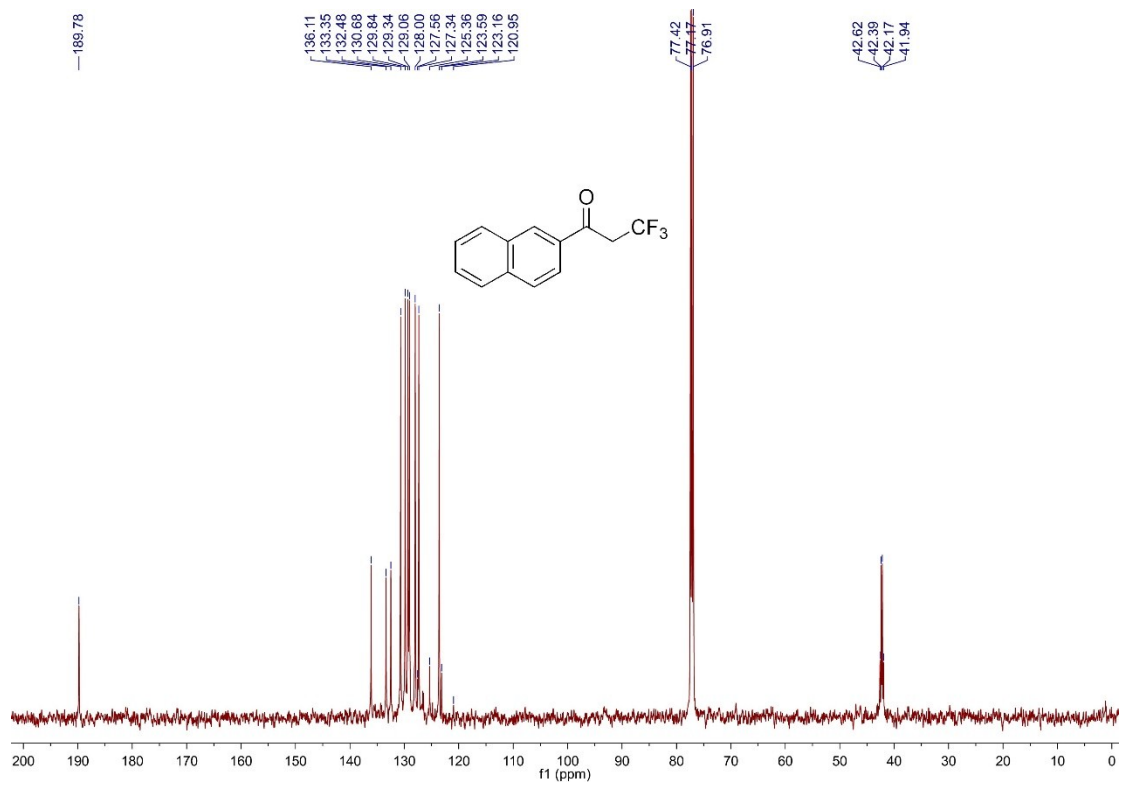

<sup>13</sup>C NMR 3q

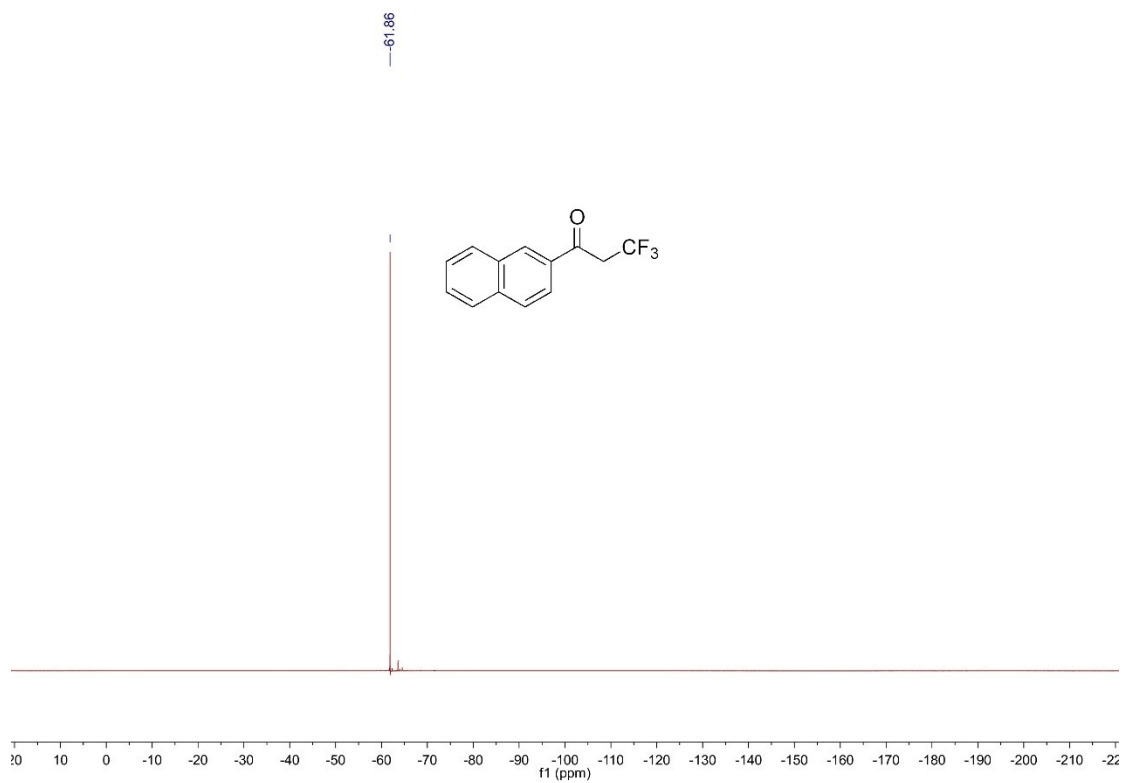

<sup>19</sup>F NMR 3q

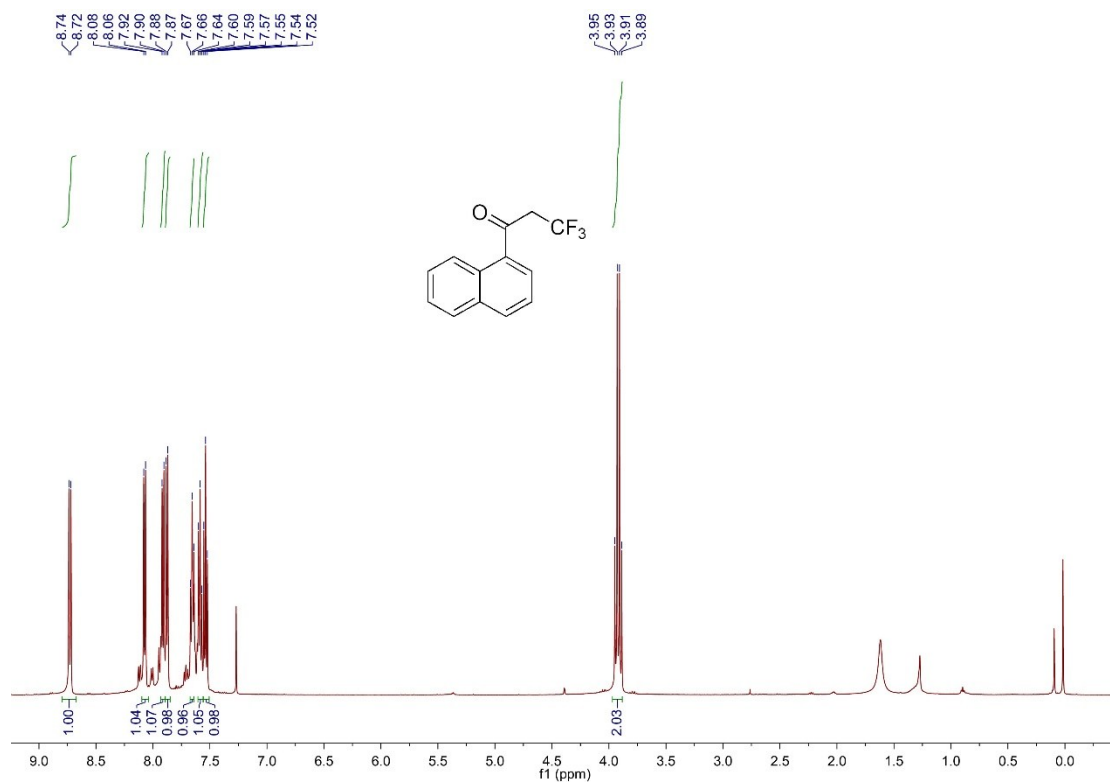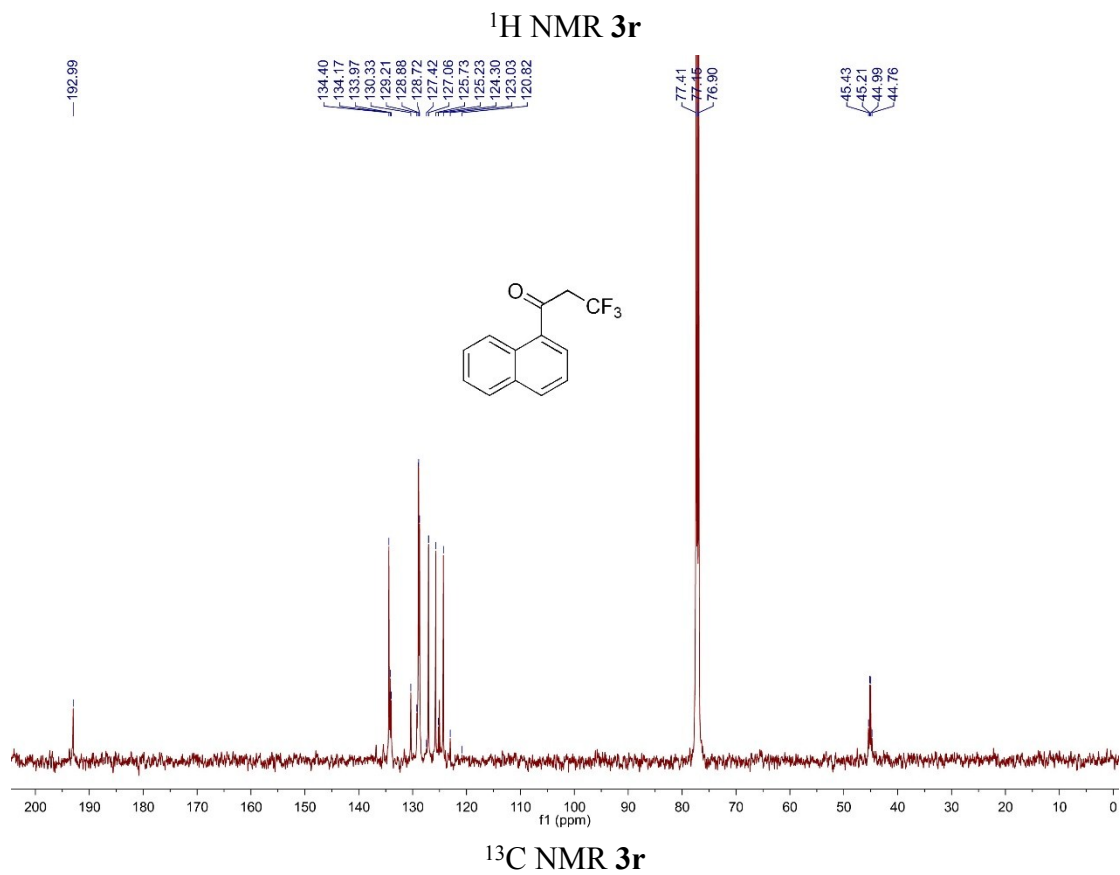

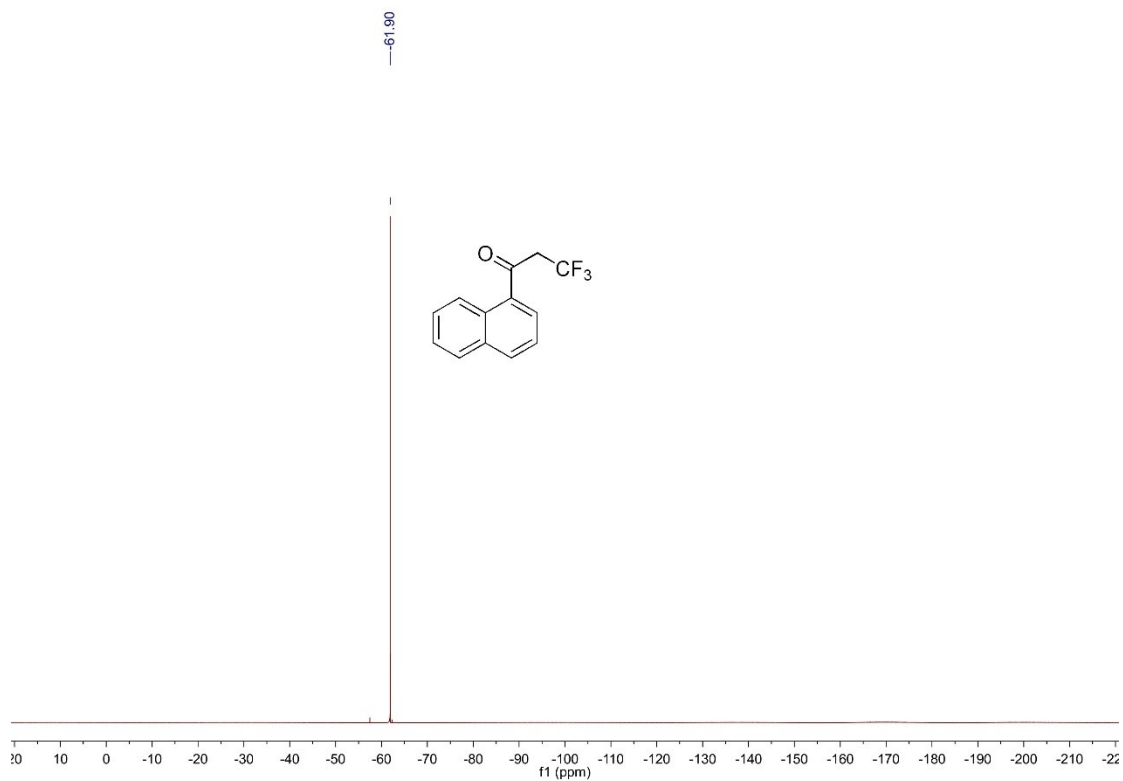

<sup>19</sup>F NMR 3r

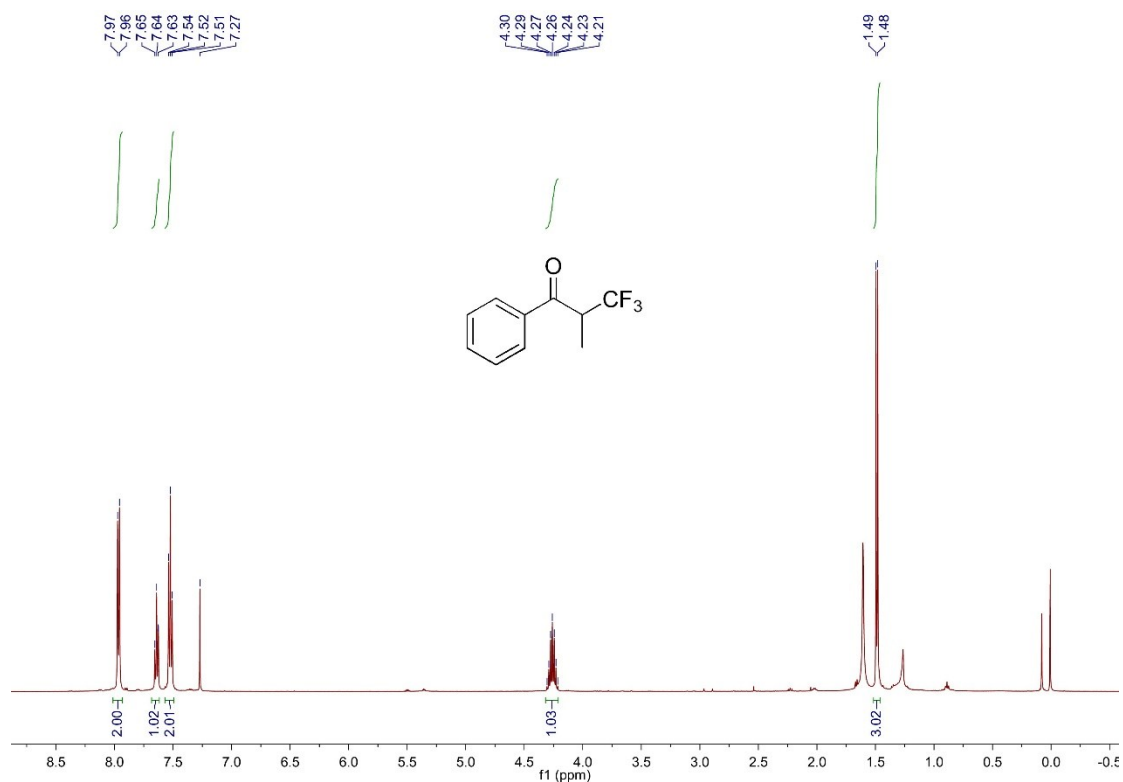

<sup>1</sup>H NMR 3s



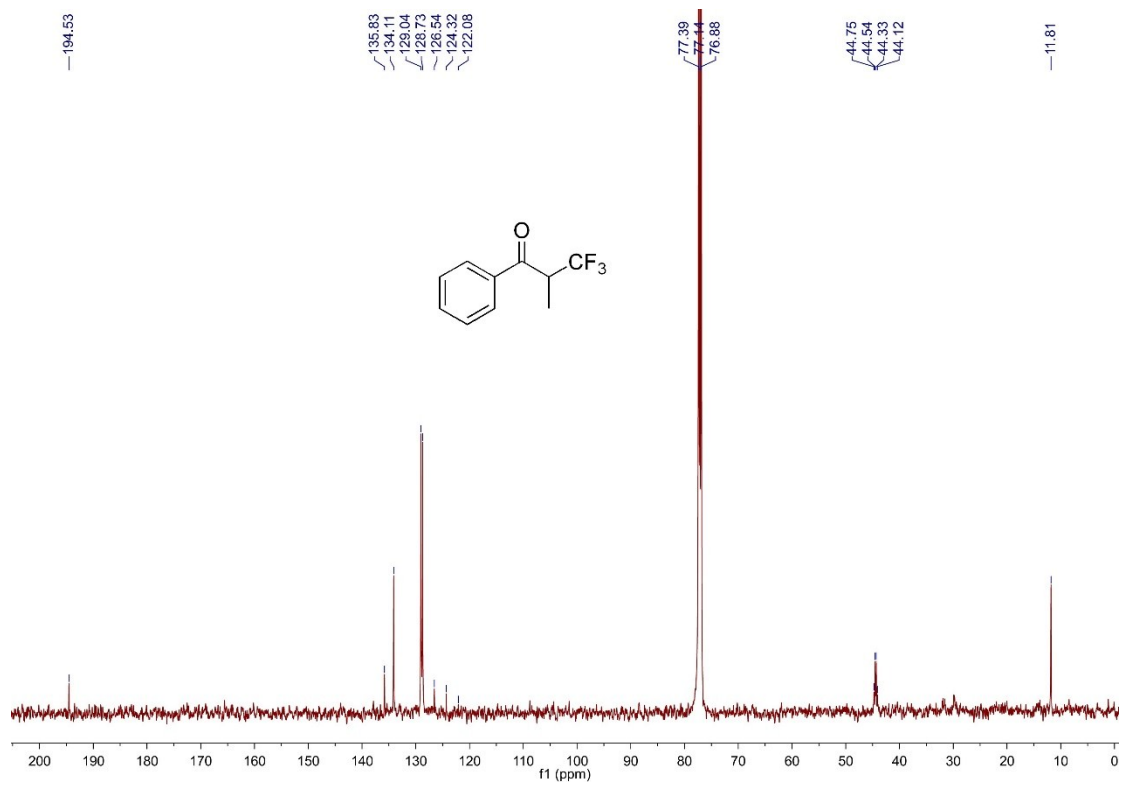

**<sup>13</sup>C NMR 3s**

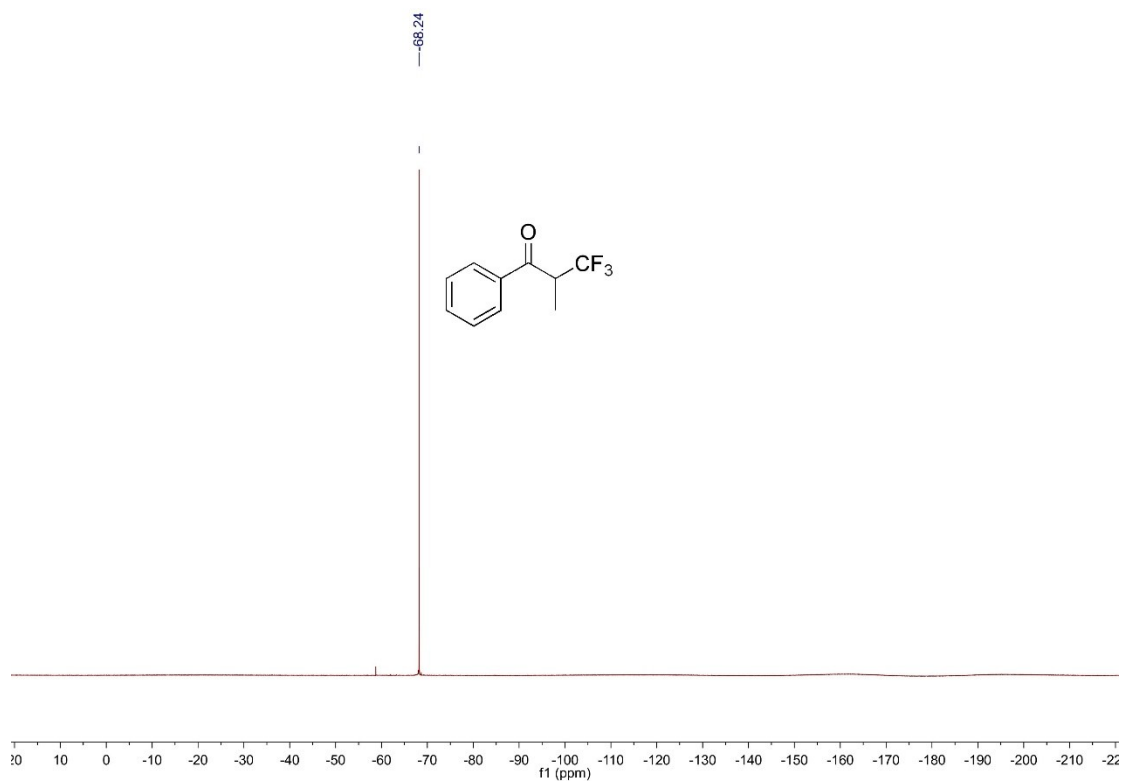

**<sup>19</sup>F NMR 3s**

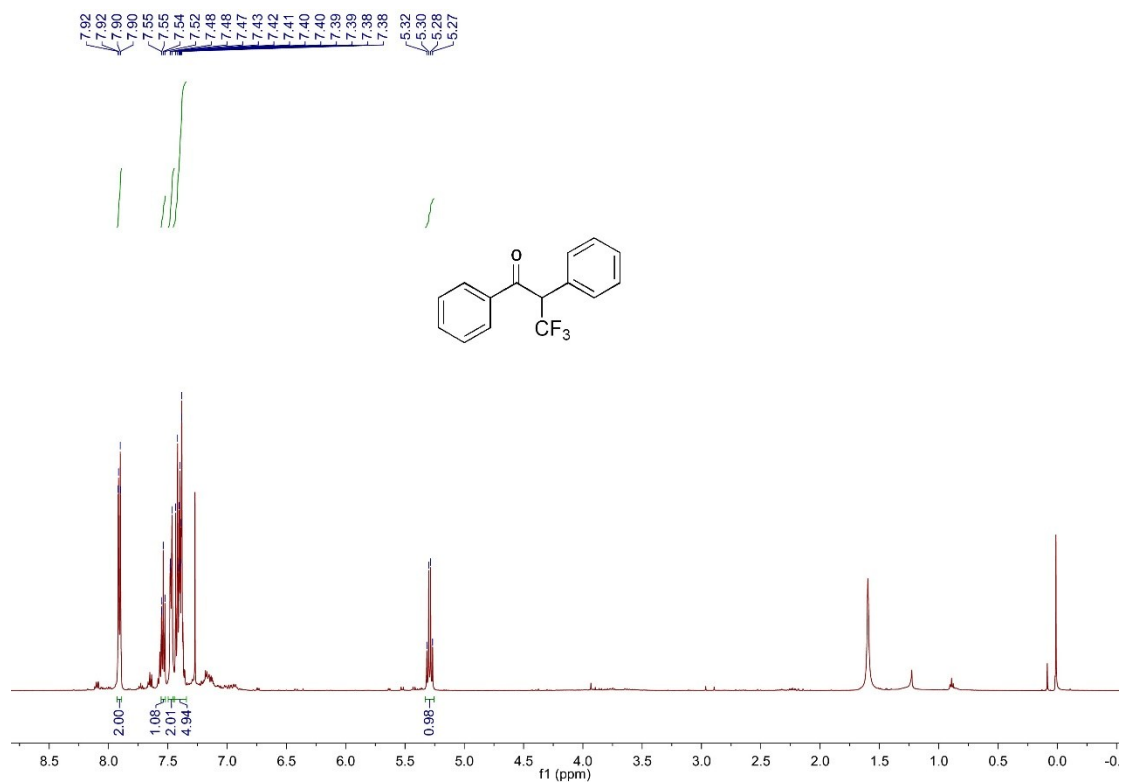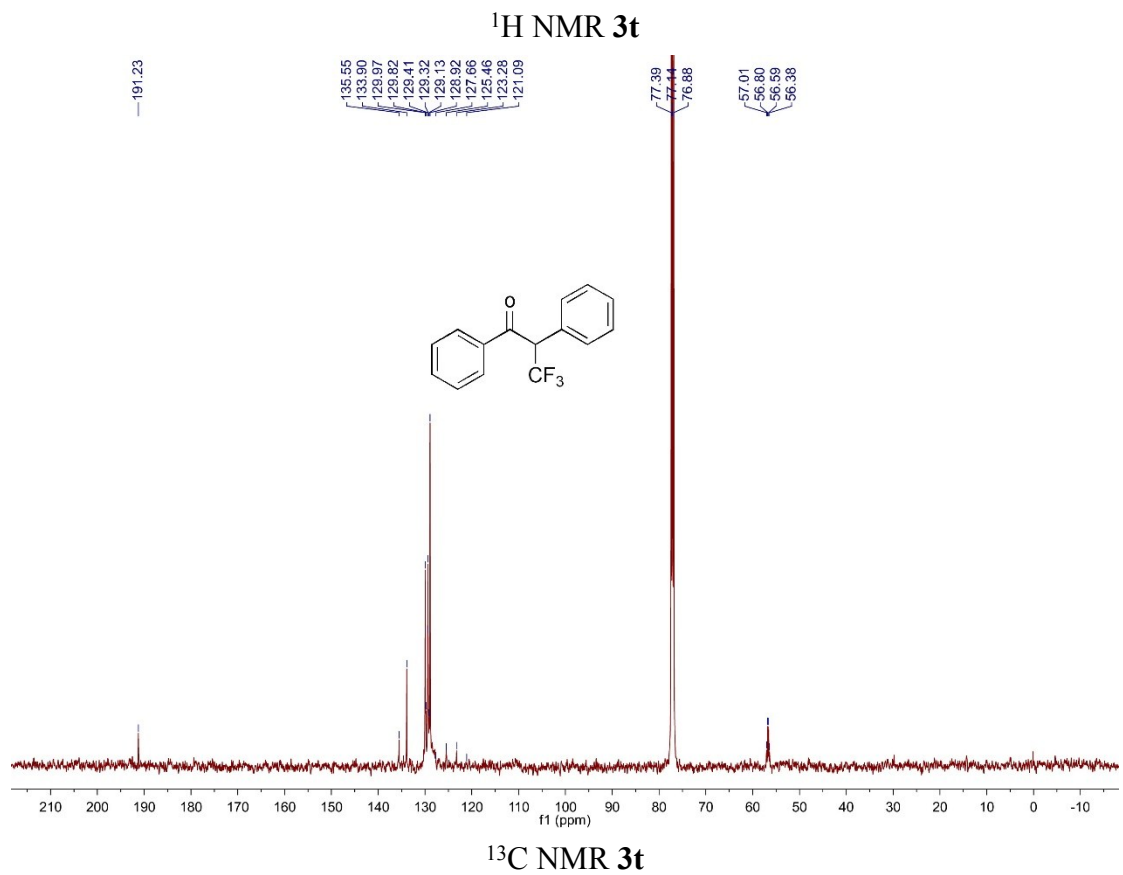

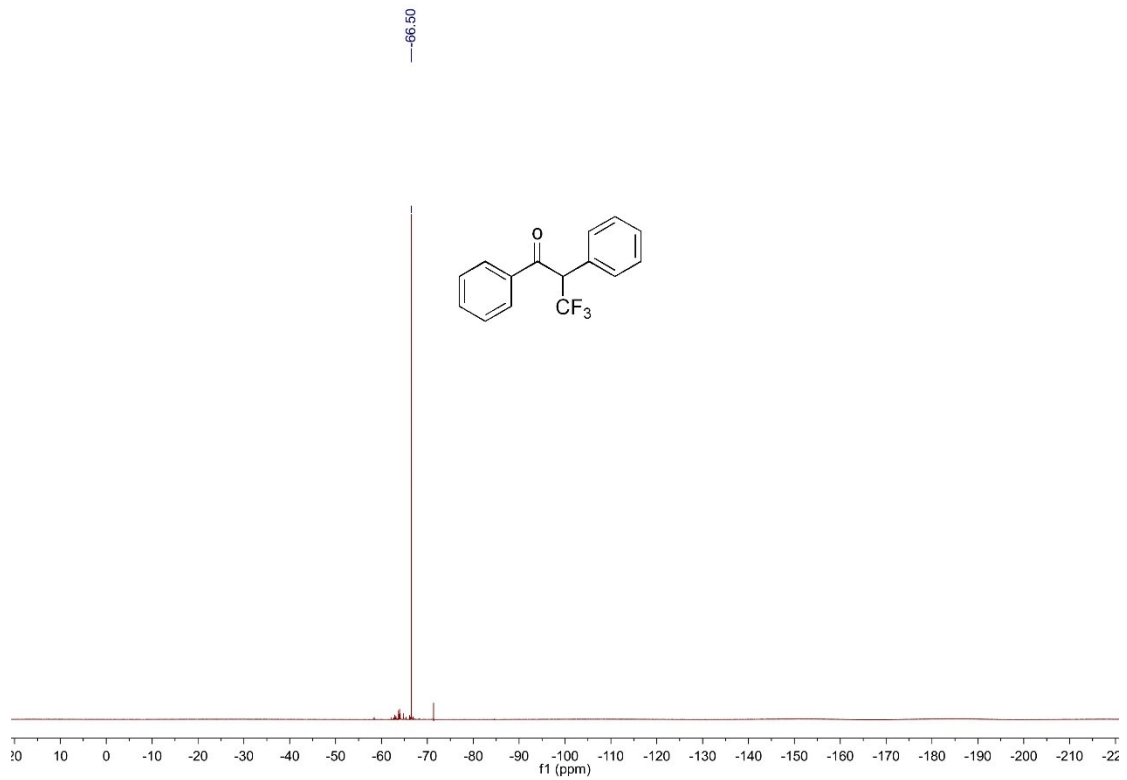

$^{19}\text{F}$  NMR 3t

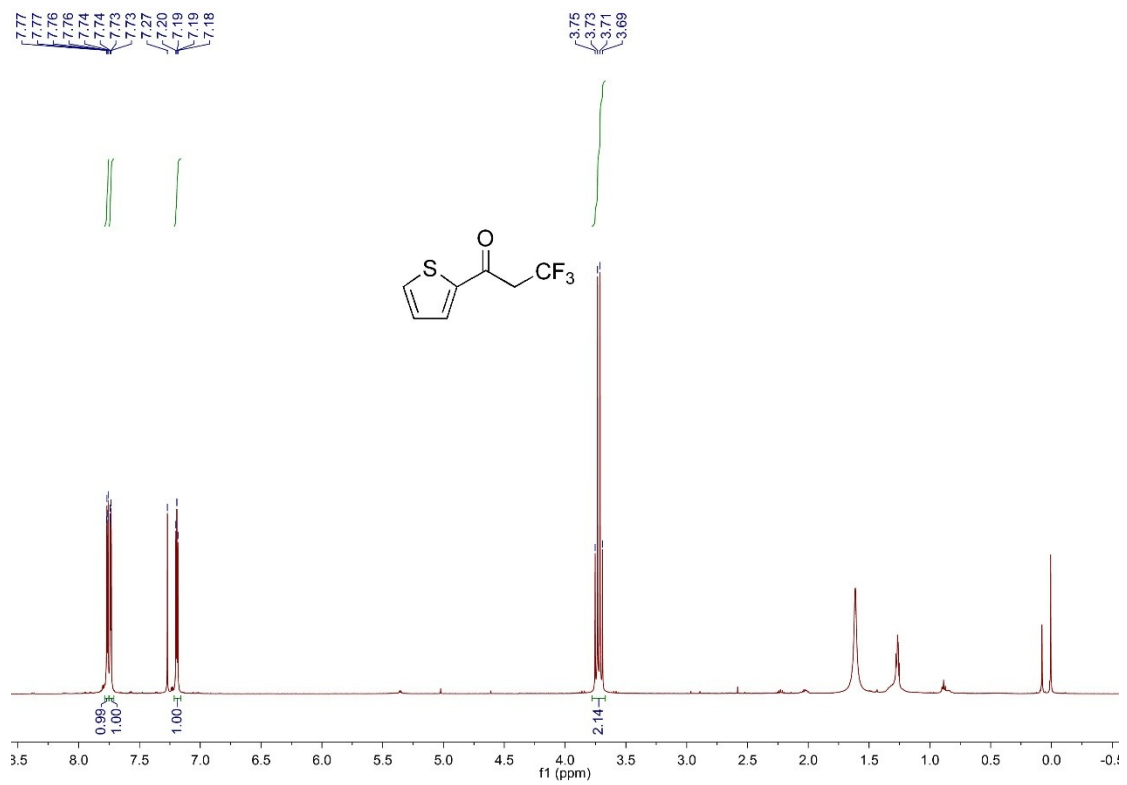

$^1\text{H}$  NMR 3u

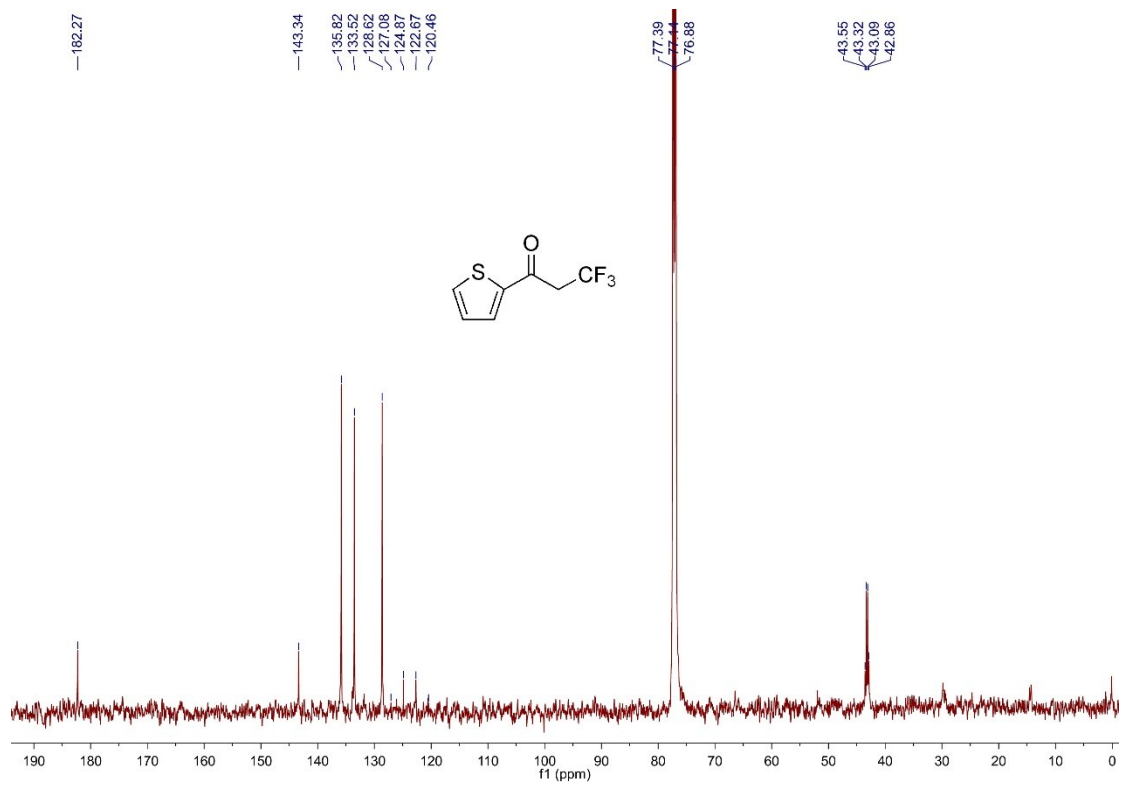

<sup>13</sup>C NMR **3u**

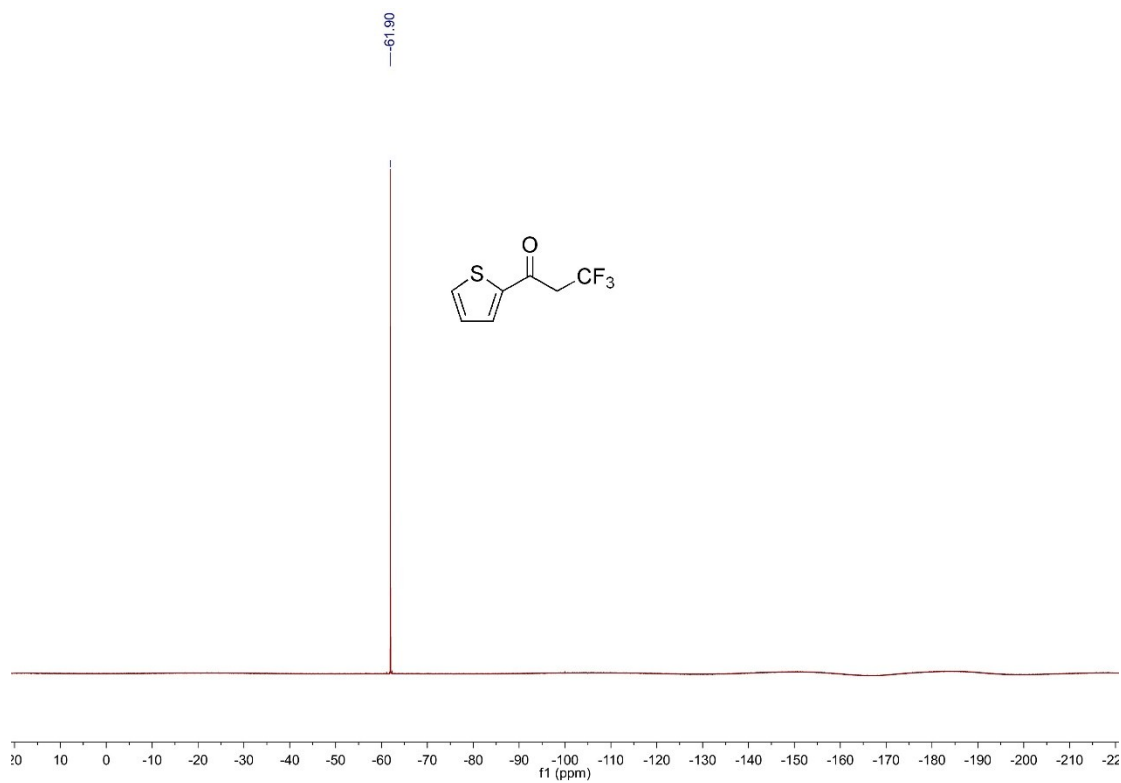

<sup>19</sup>F NMR **3u**

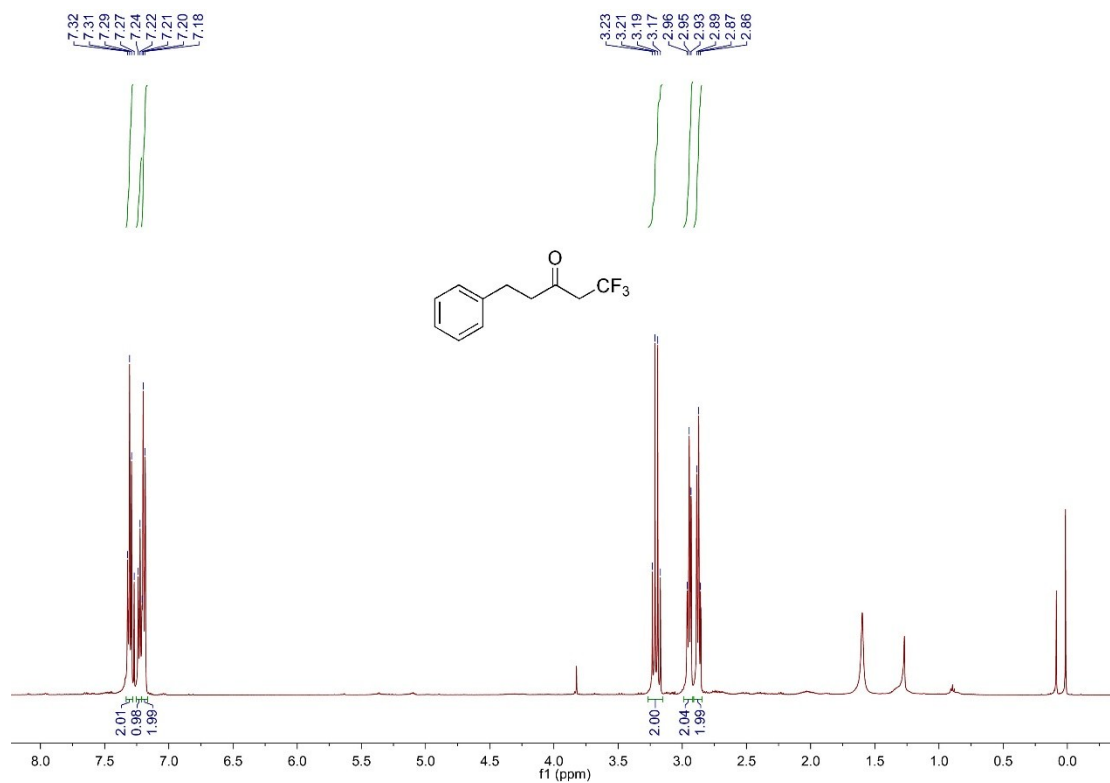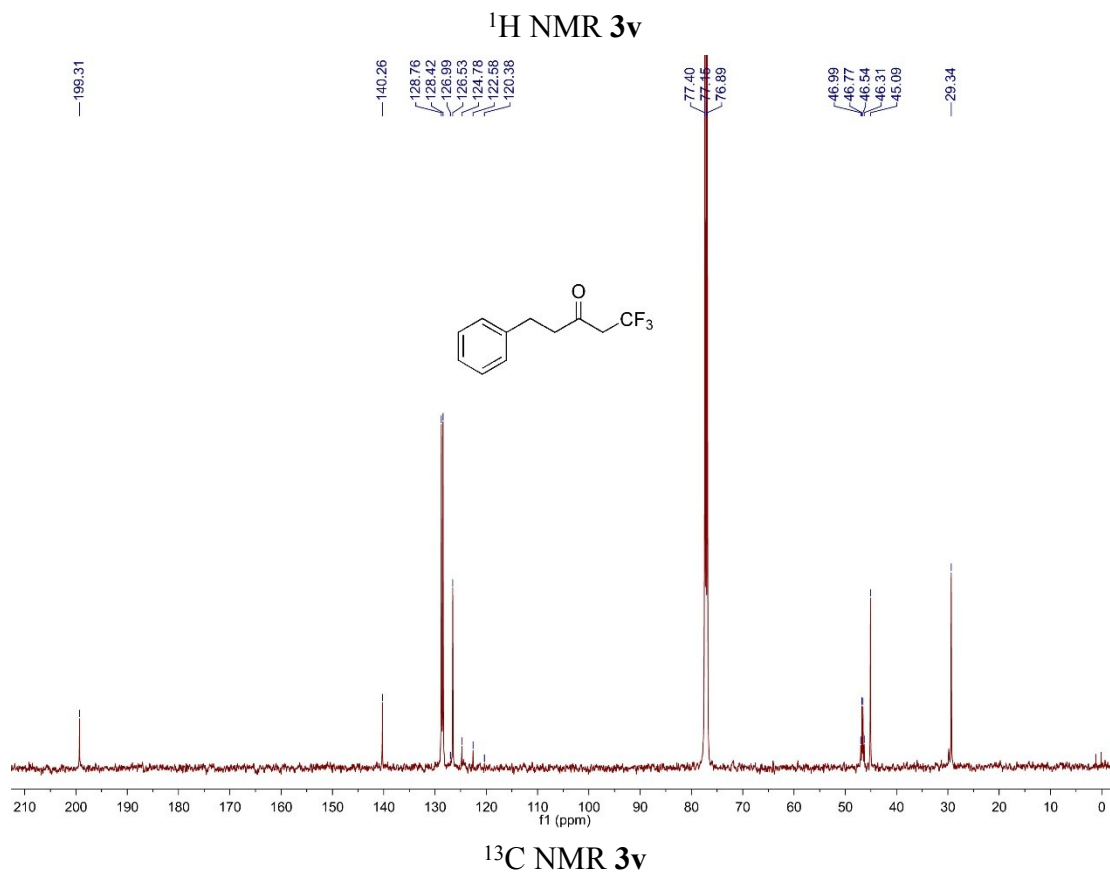

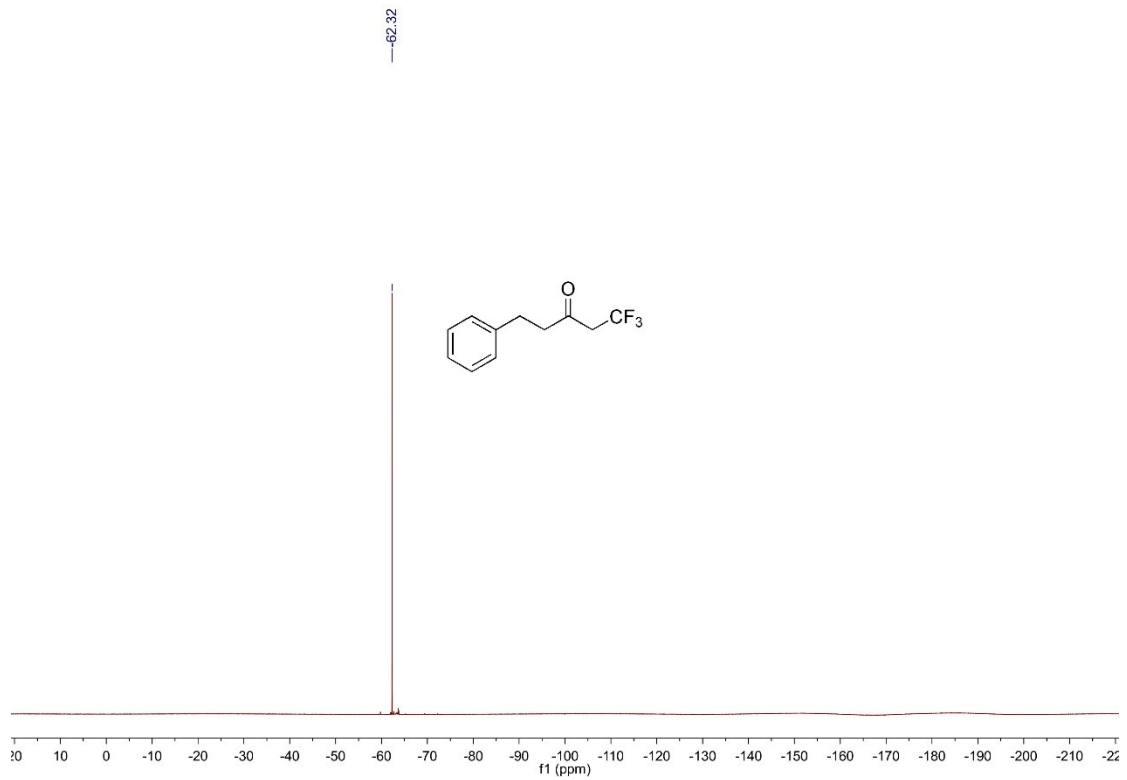

<sup>19</sup>F NMR **3v**

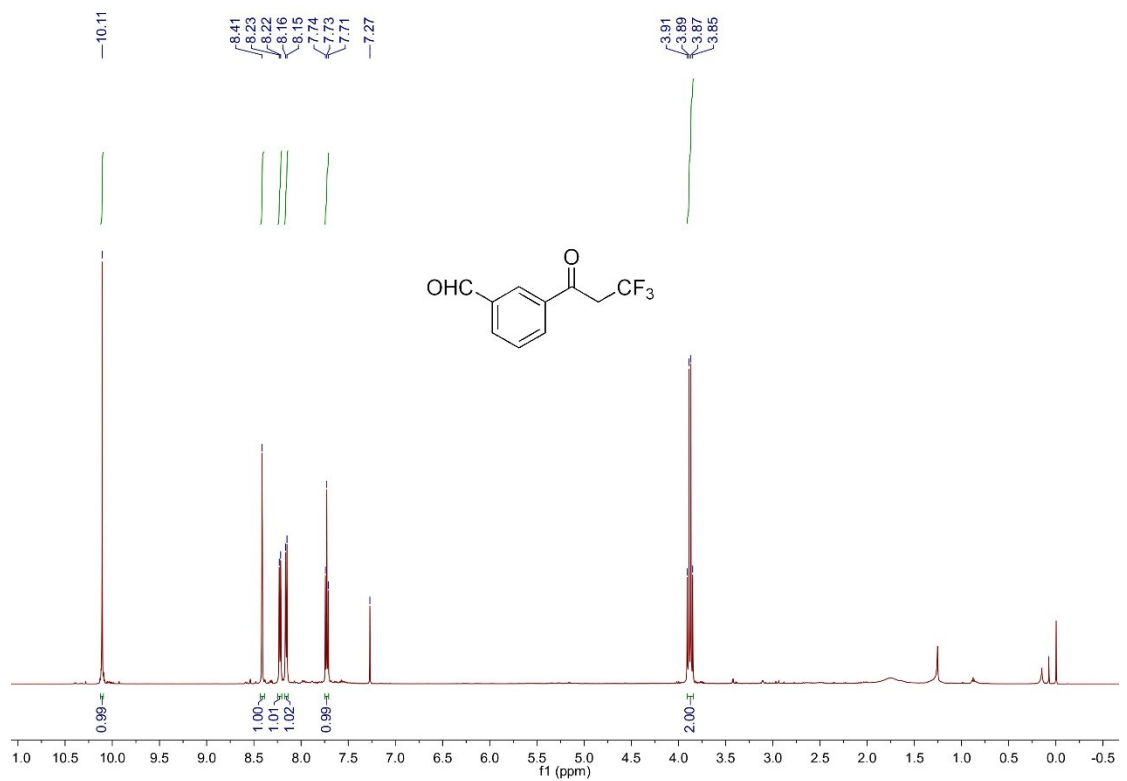

<sup>1</sup>H NMR **3w**

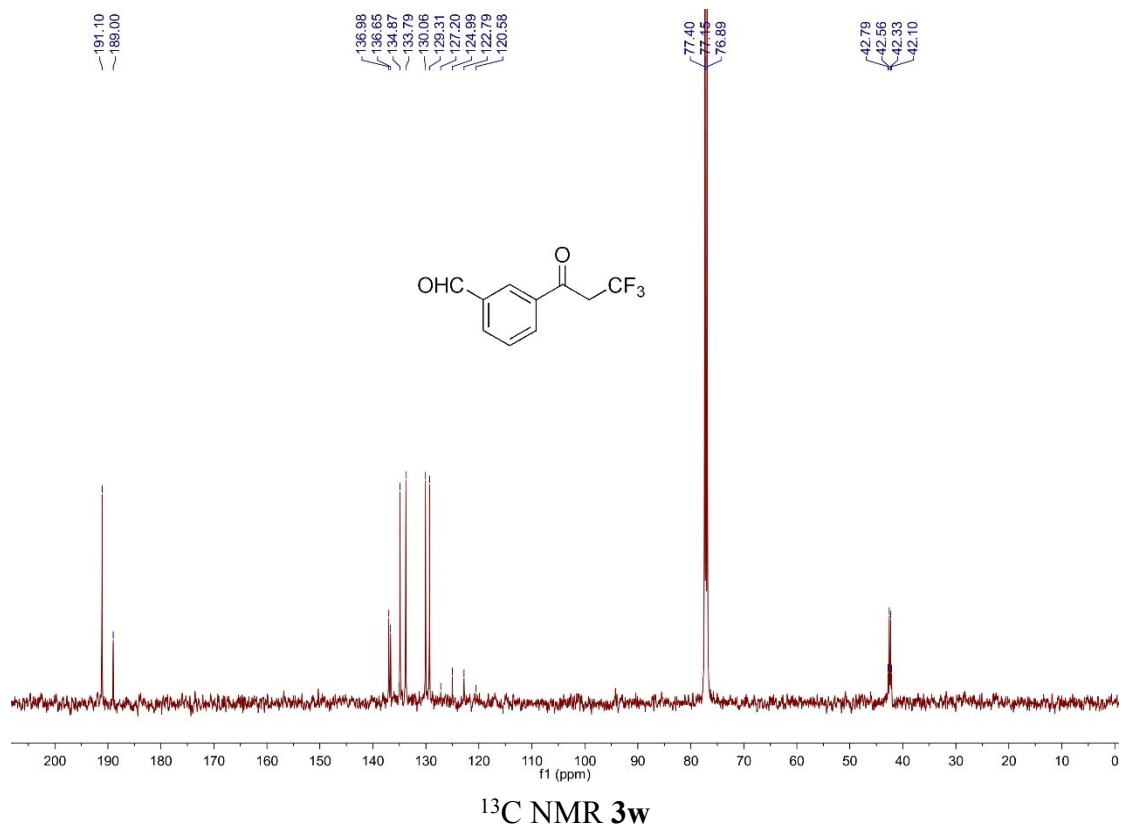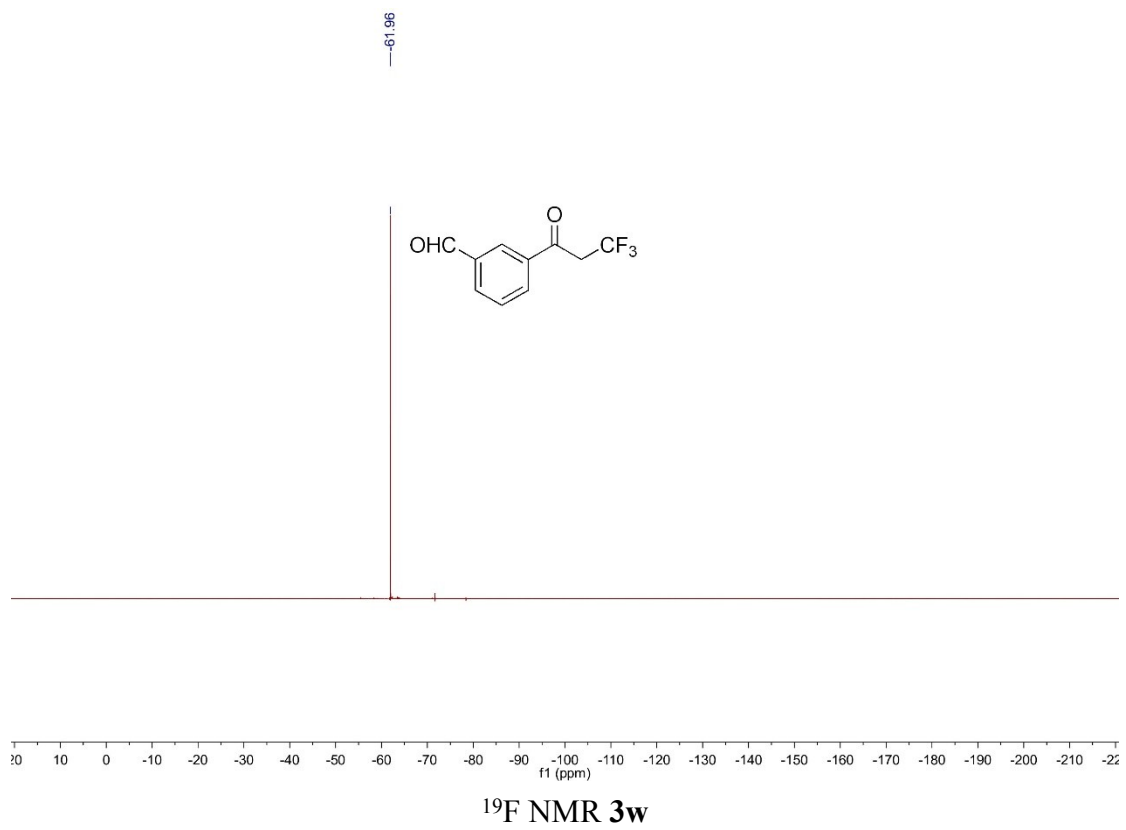

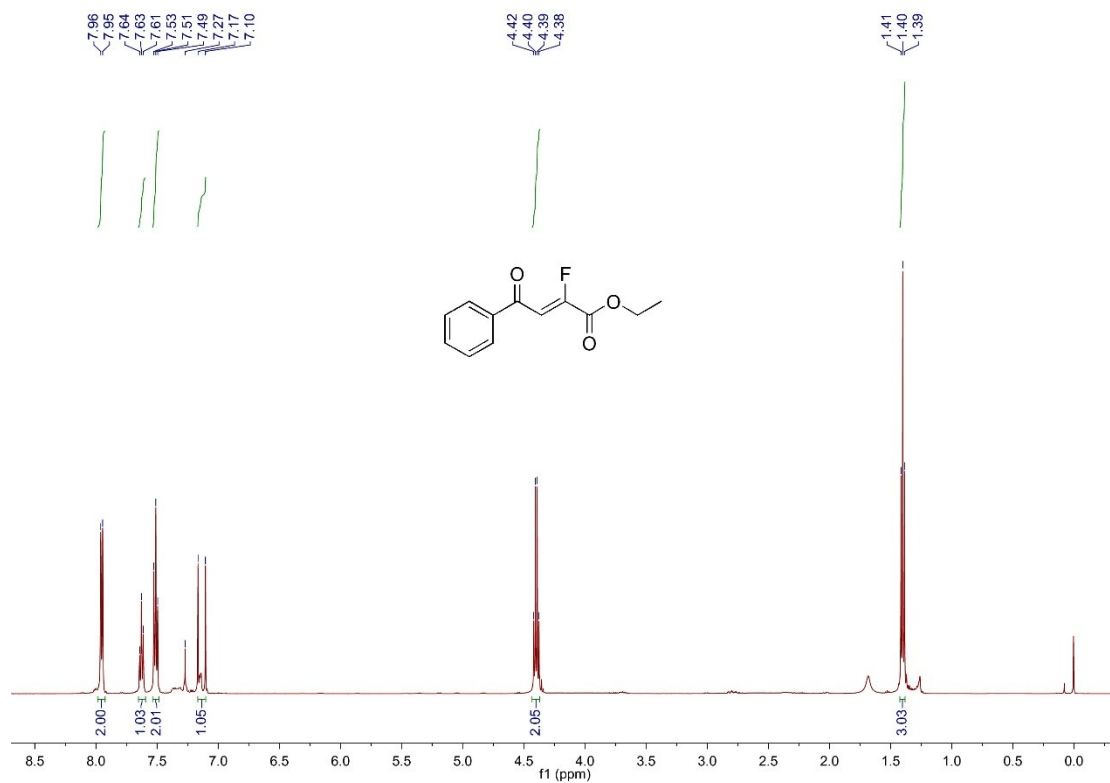

$^1\text{H NMR}$  4a

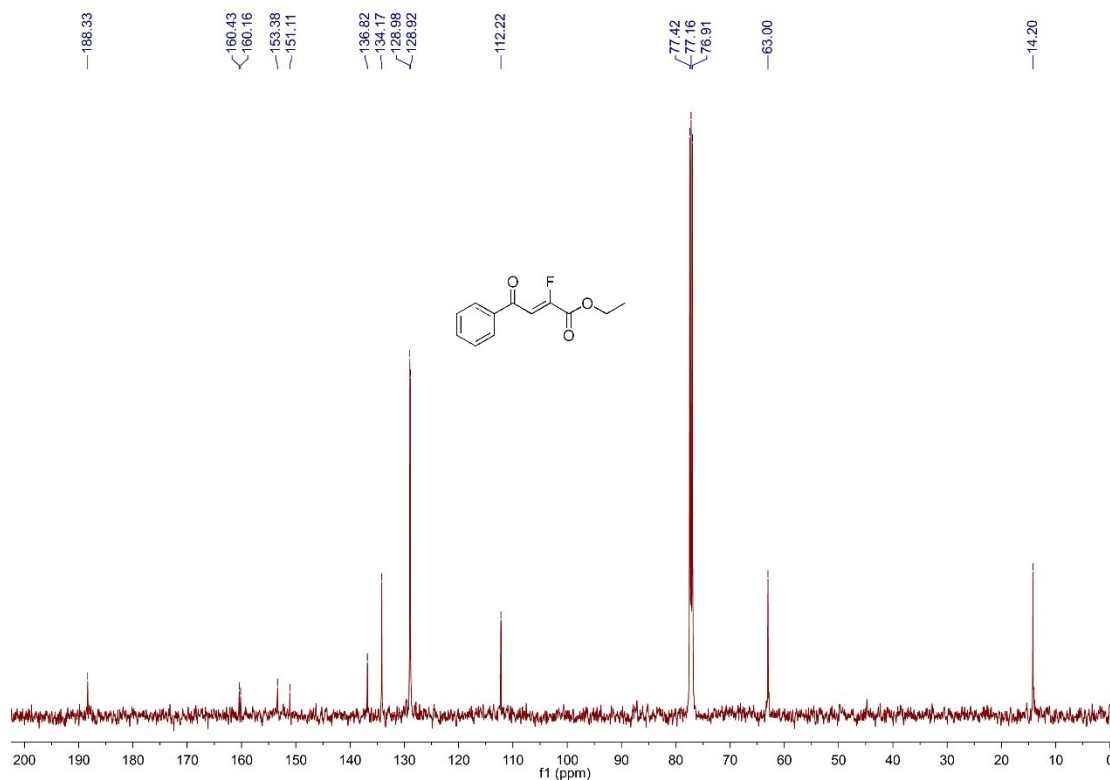

$^{13}\text{C NMR}$  4a



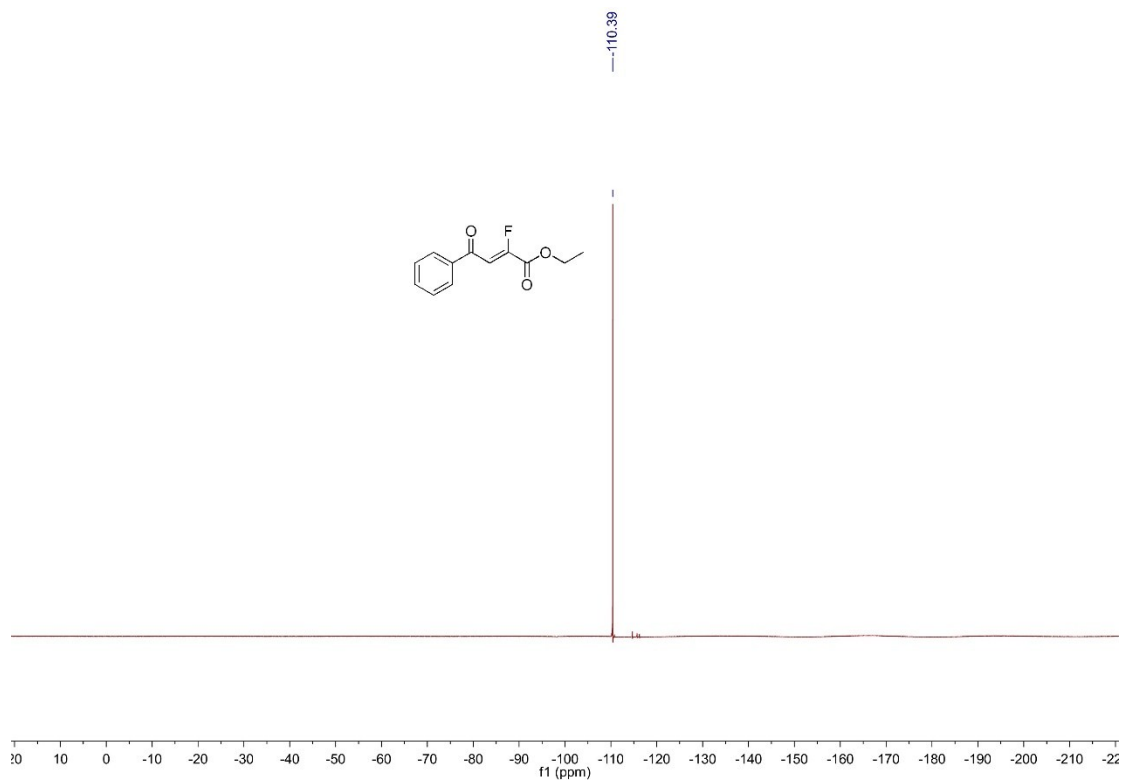

$^{19}\text{F}$  NMR 4a

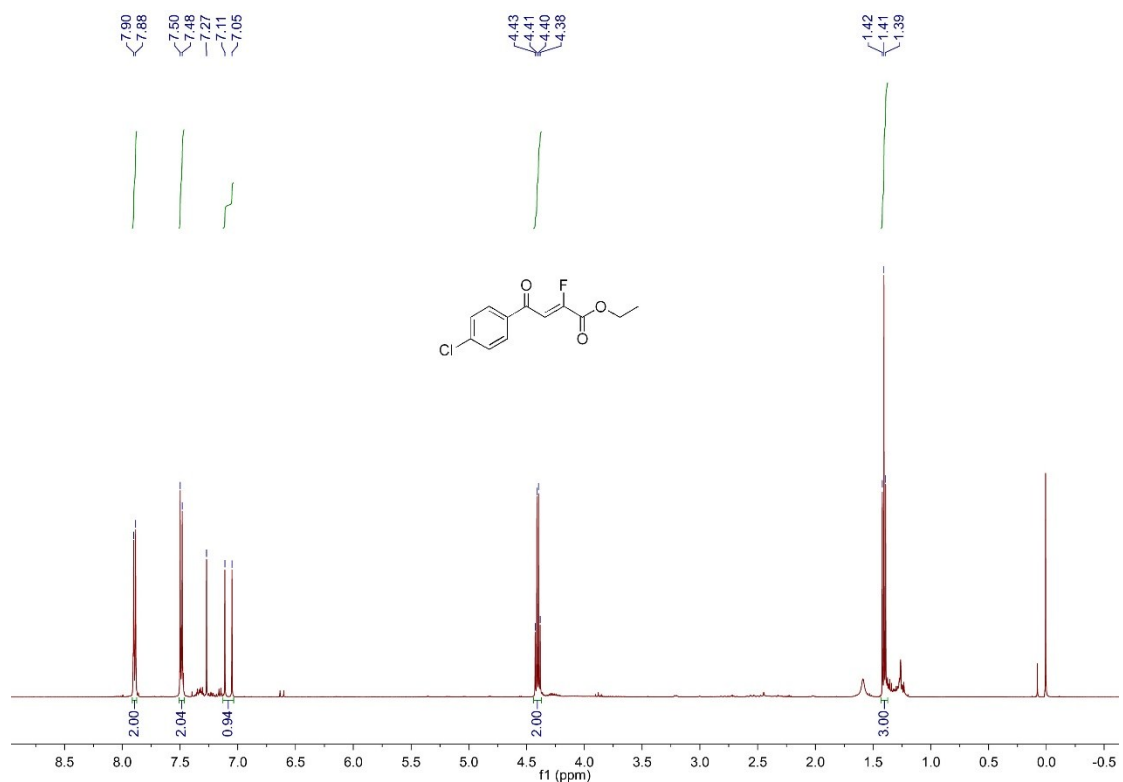

$^1\text{H}$  NMR 4b

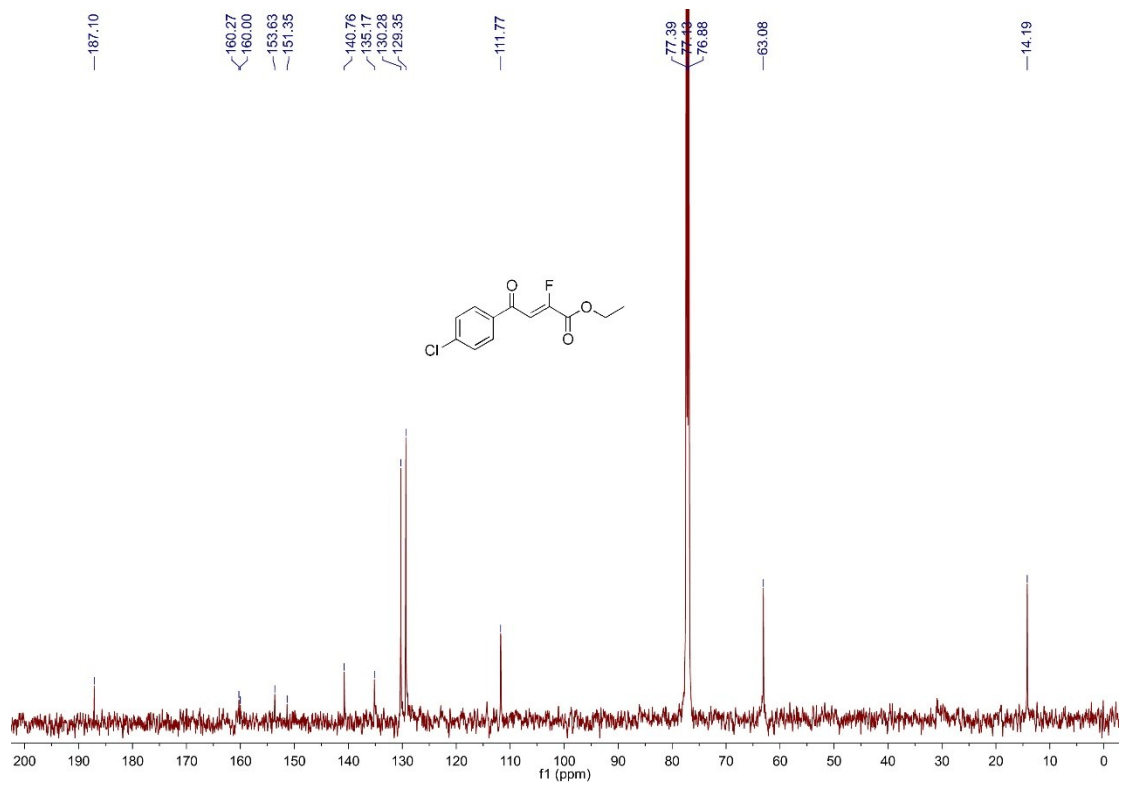

<sup>13</sup>C NMR 4b

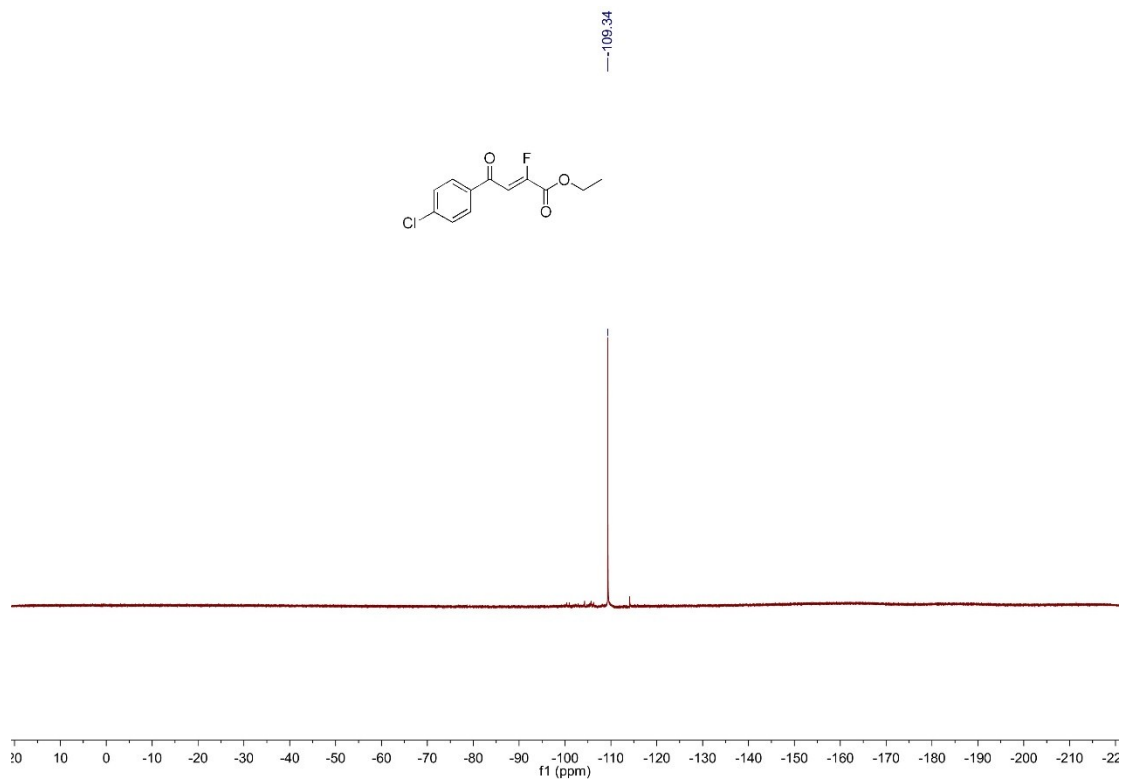

<sup>19</sup>F NMR 4b

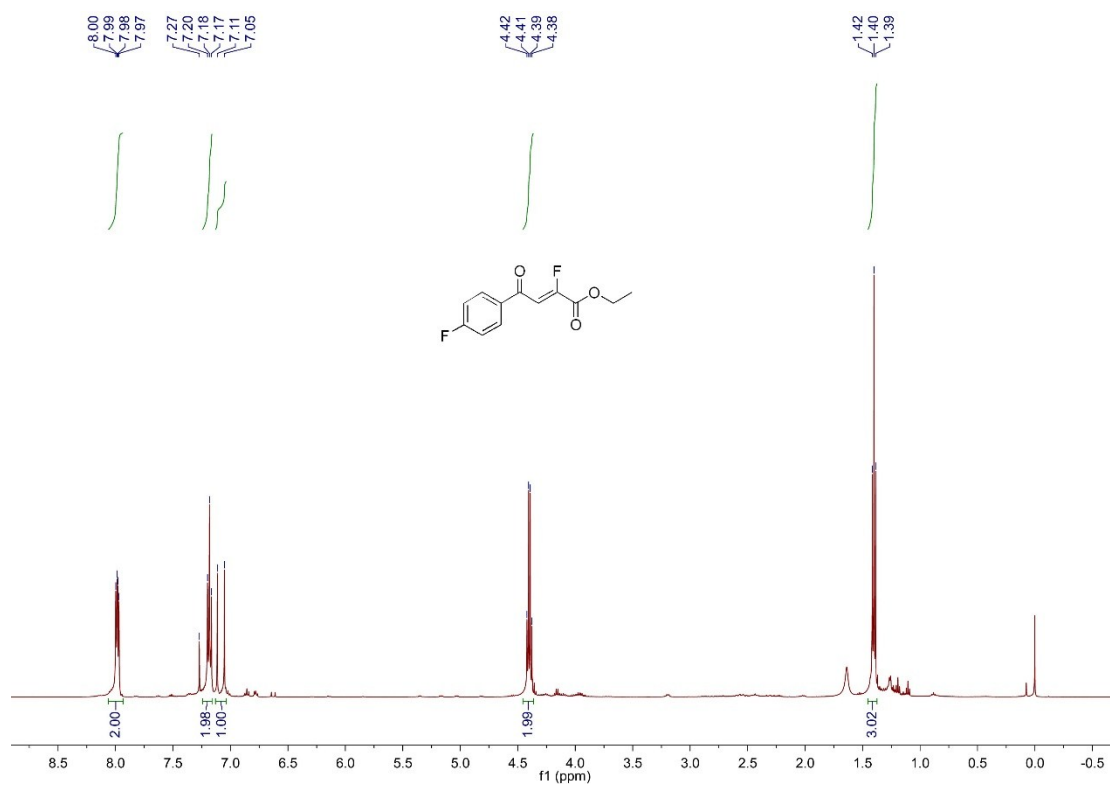

$^1\text{H NMR}$  4c

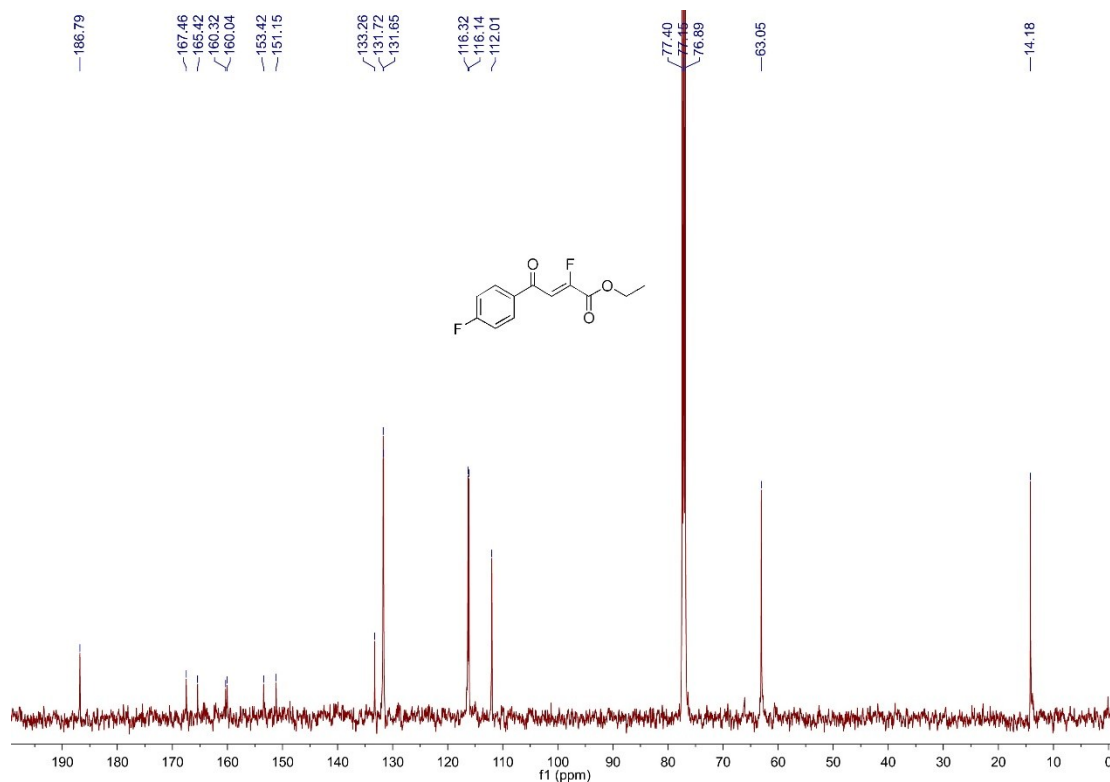

$^{13}\text{C NMR}$  4c

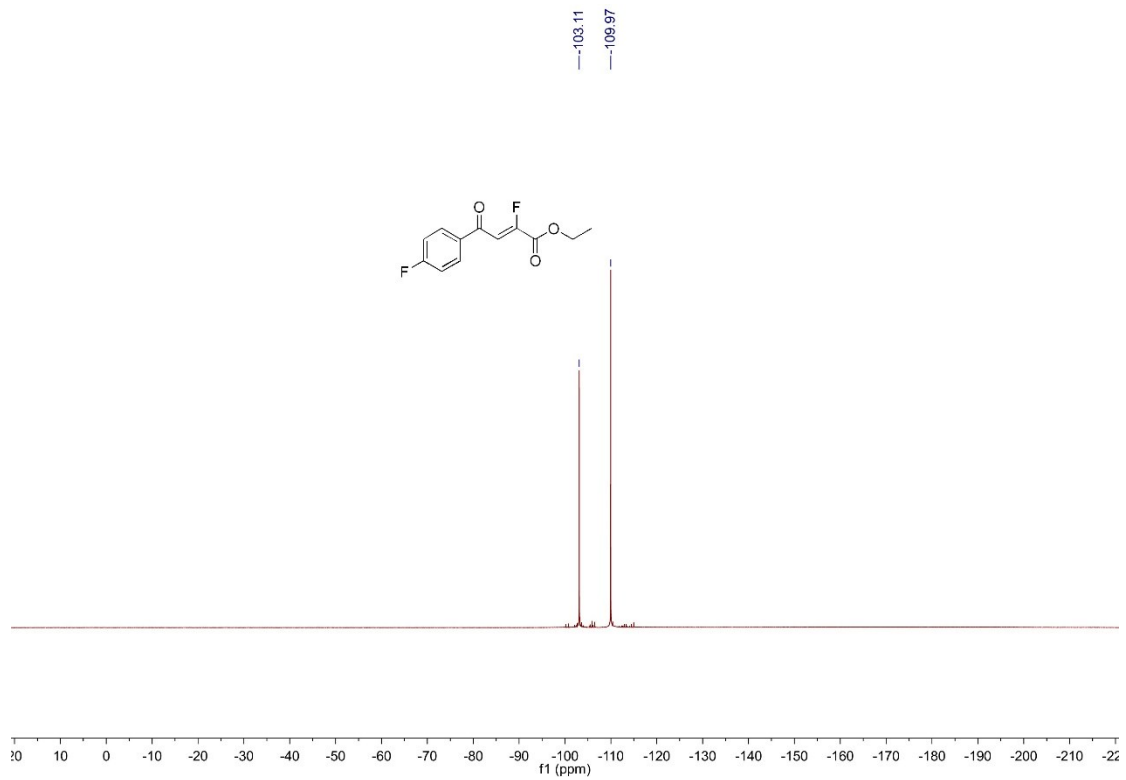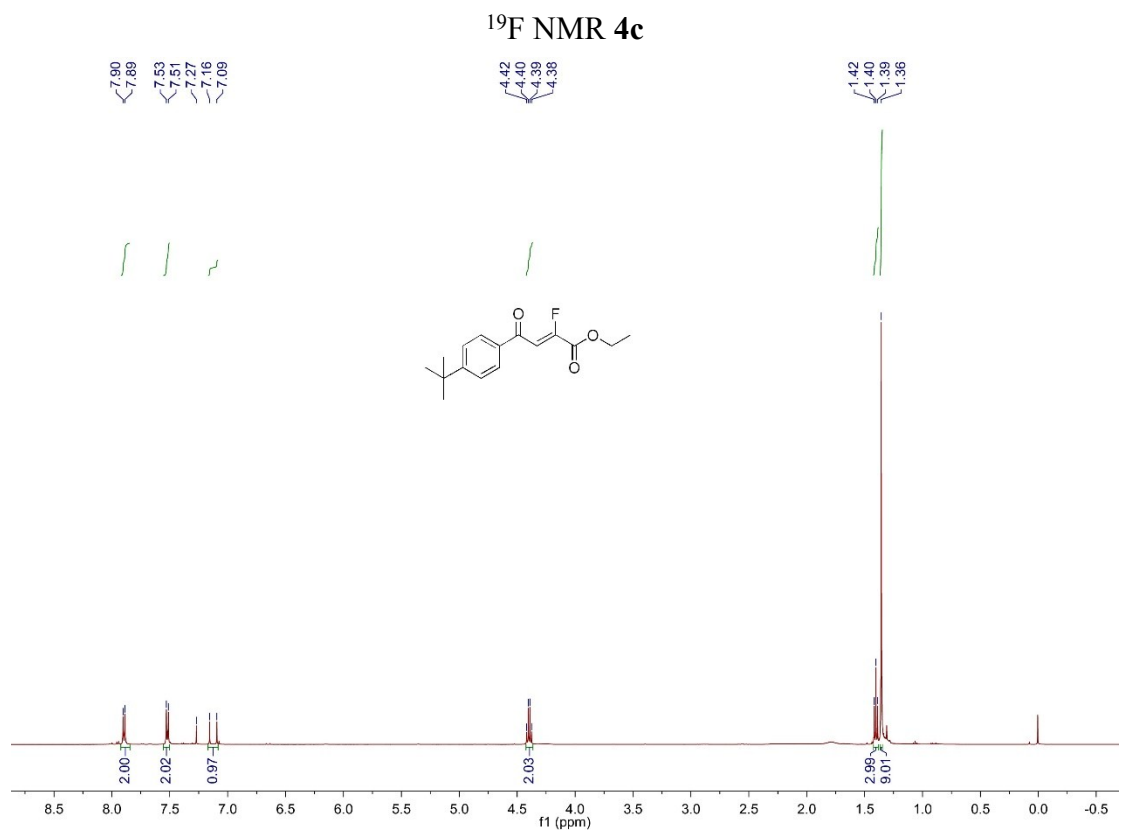

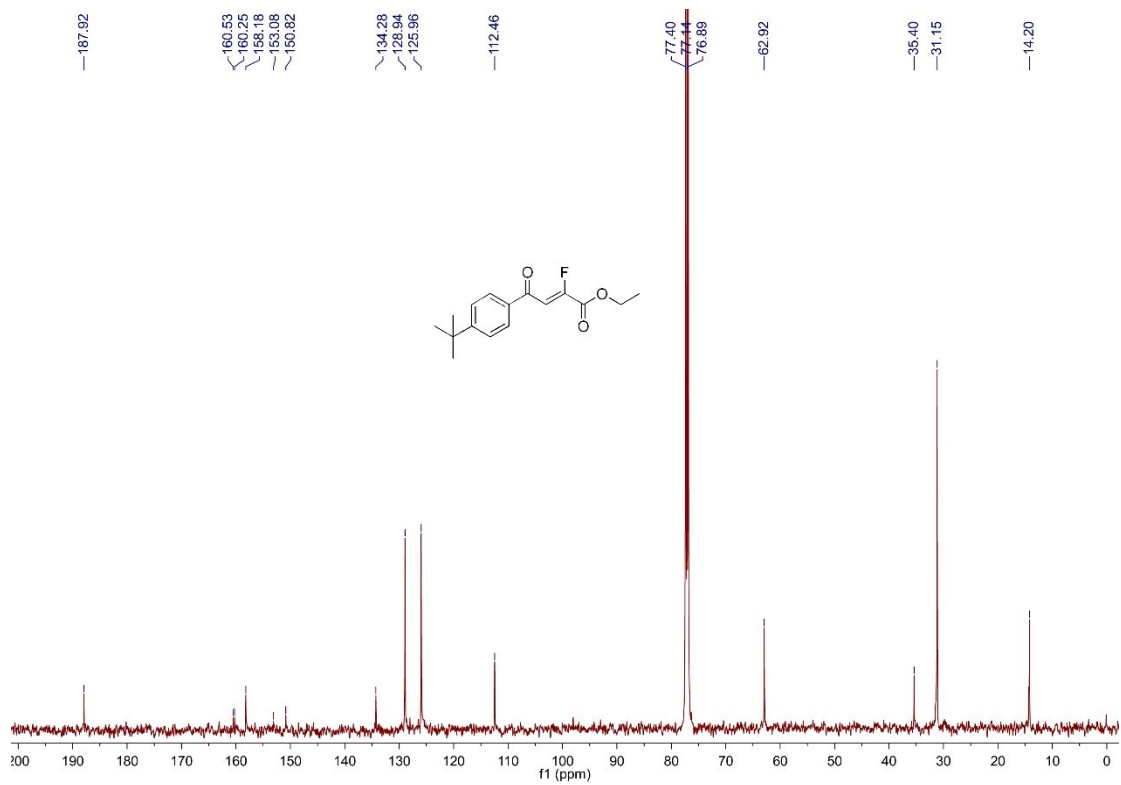

<sup>13</sup>C NMR 4d

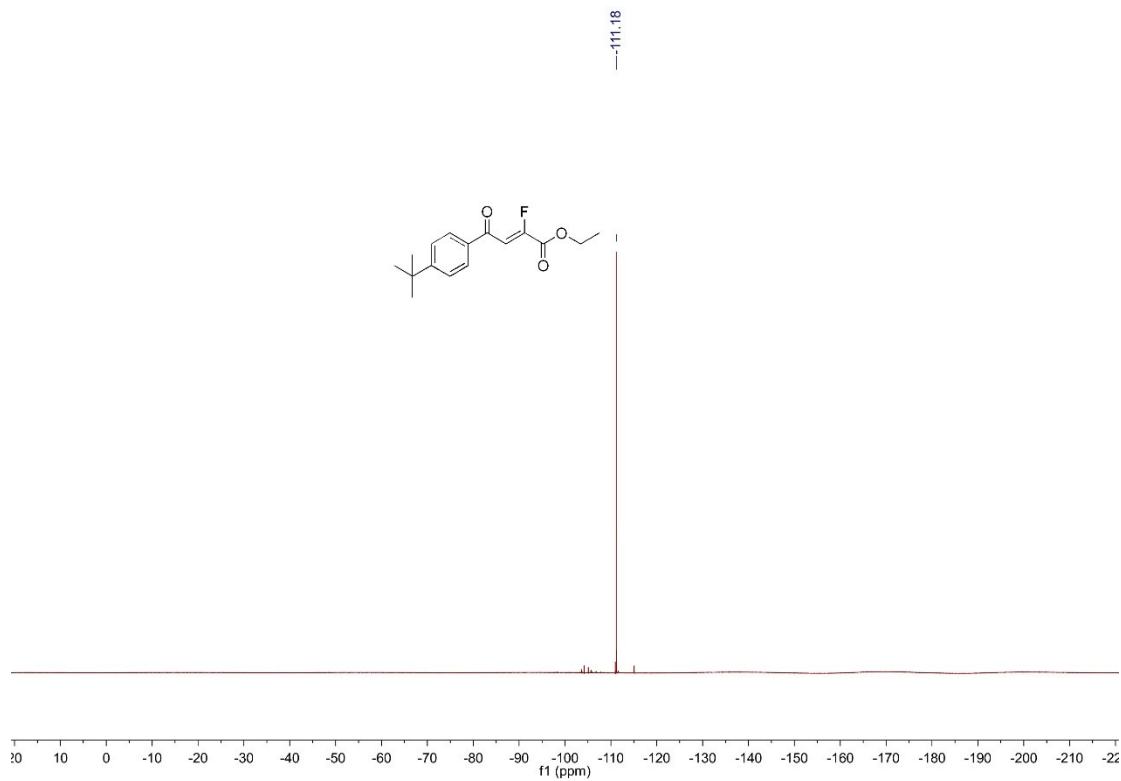

<sup>19</sup>F NMR 4d

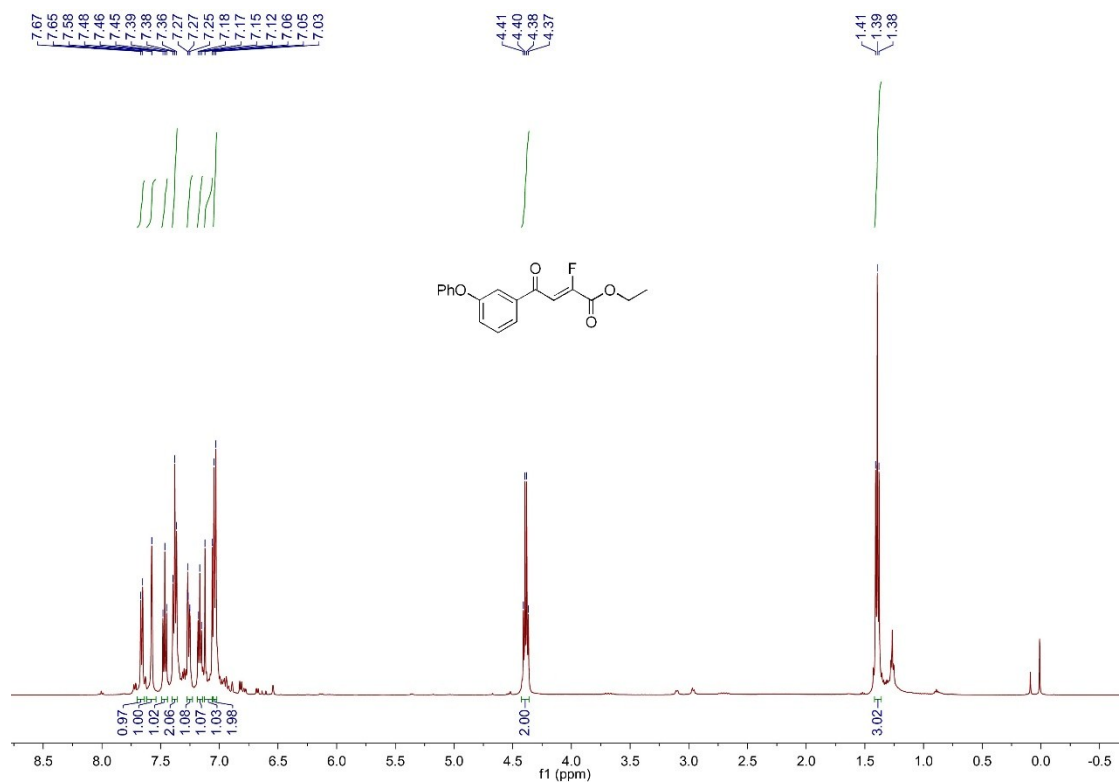

<sup>1</sup>H NMR 4e

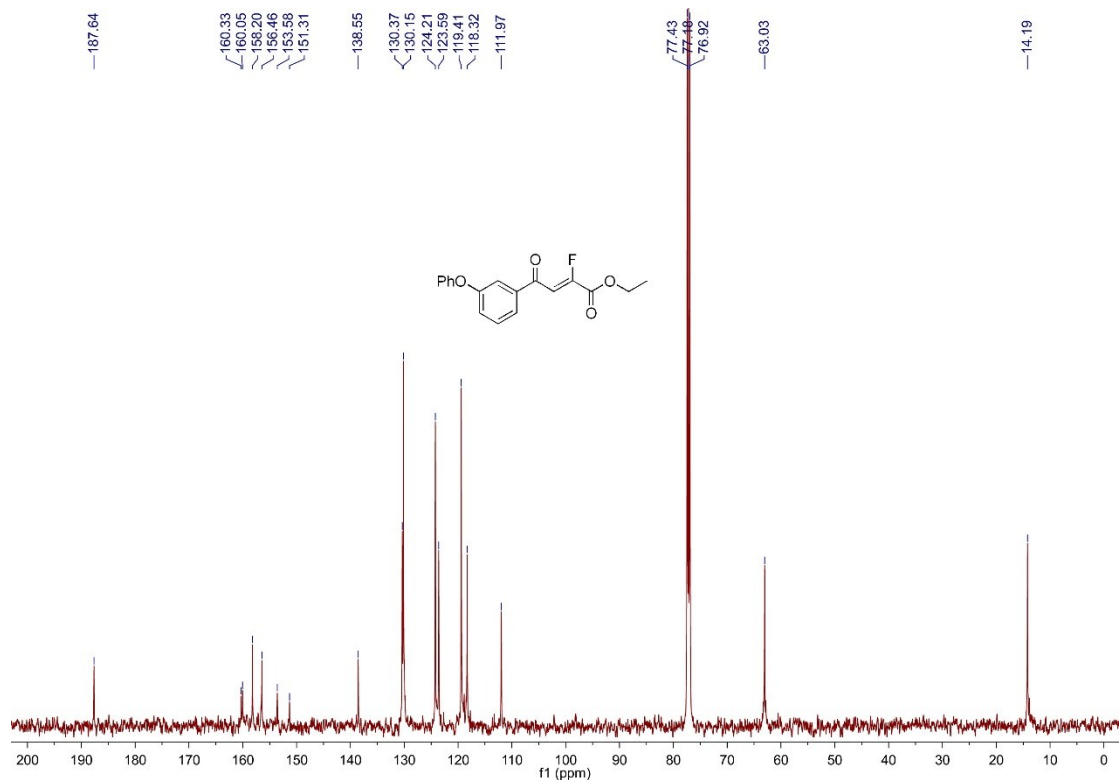

<sup>13</sup>C NMR 4e

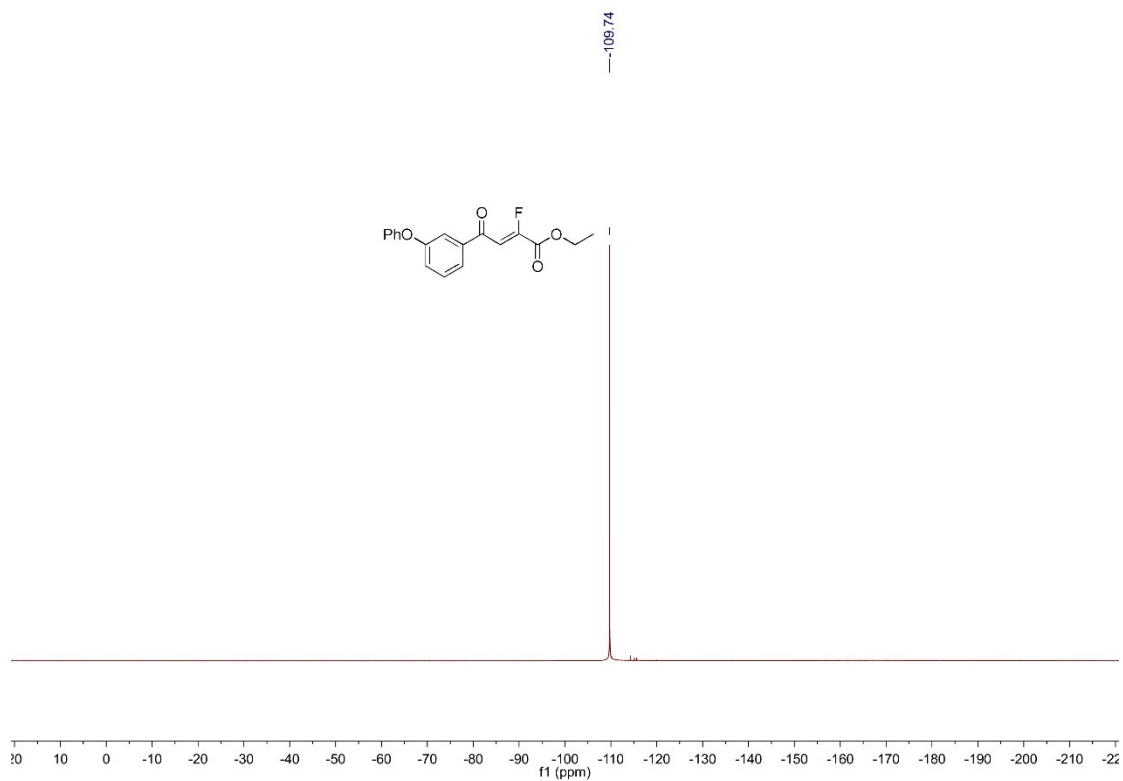

$^{19}\text{F}$  NMR 4e

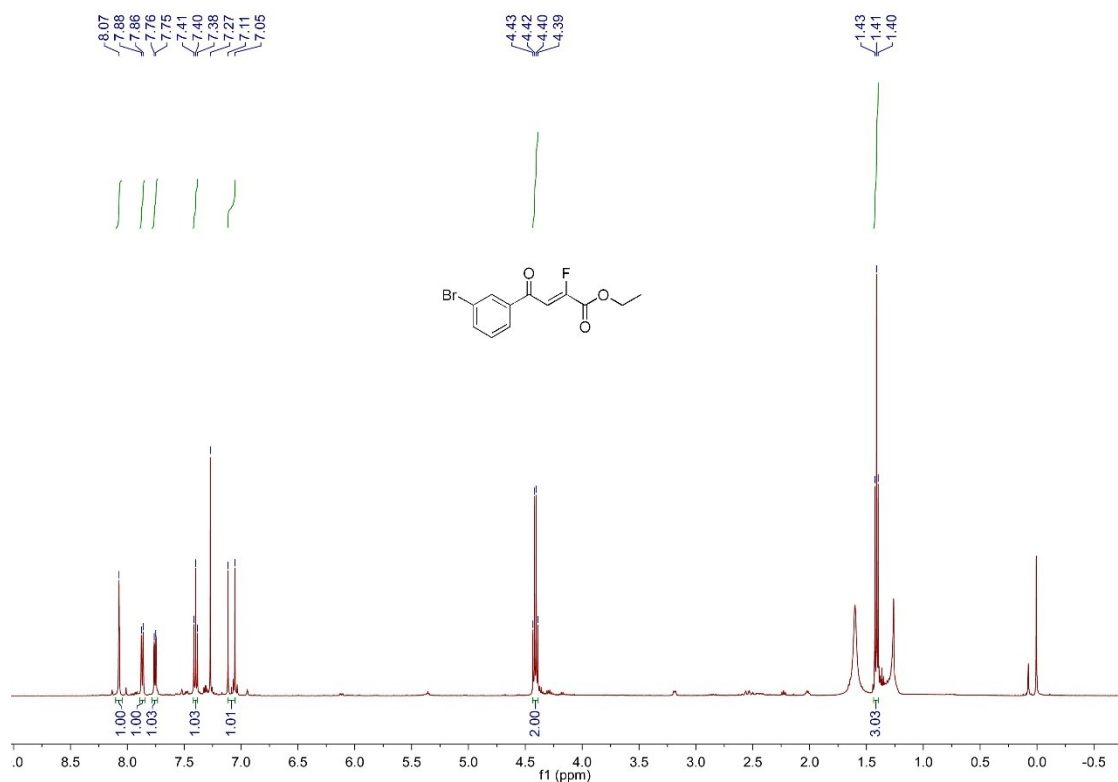

$^1\text{H}$  NMR 4f

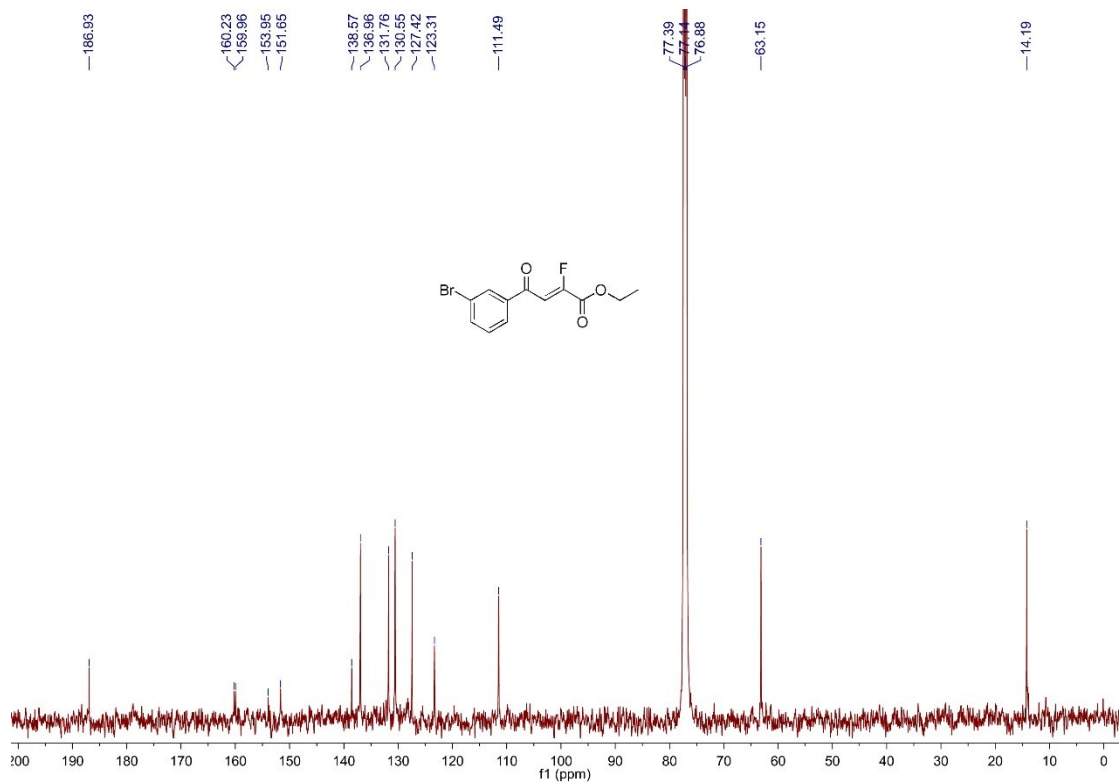

<sup>13</sup>C NMR 4f

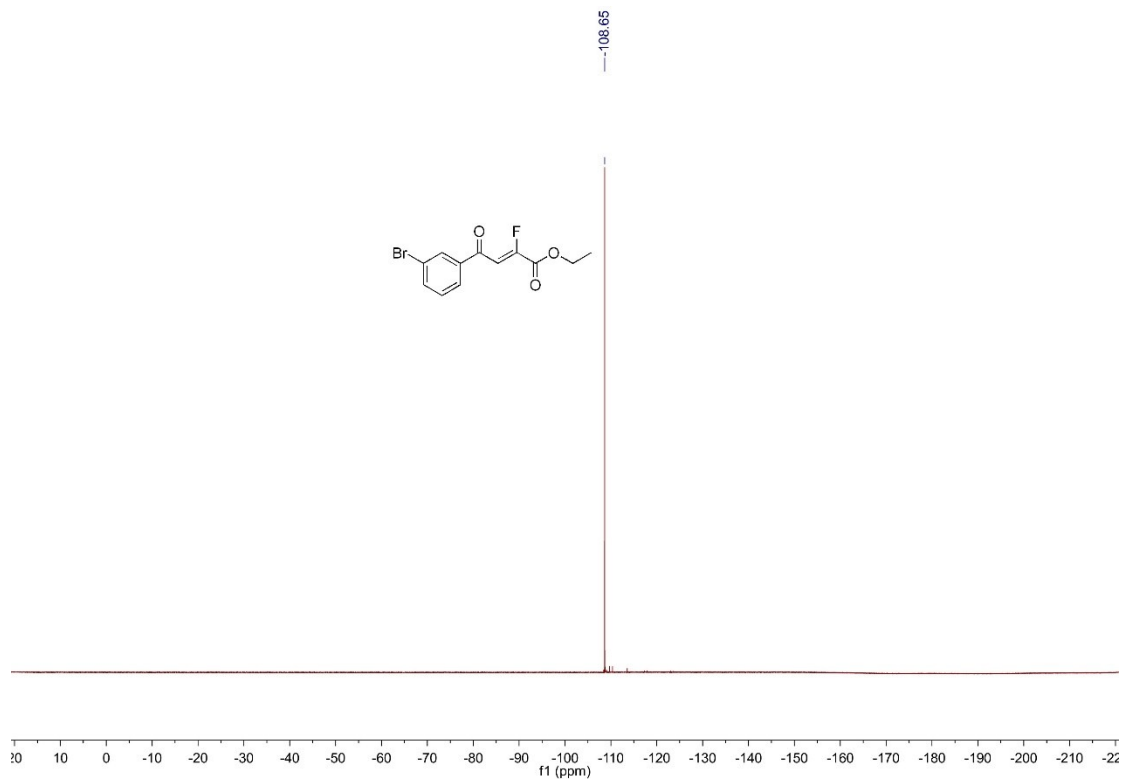

<sup>19</sup>F NMR 4f



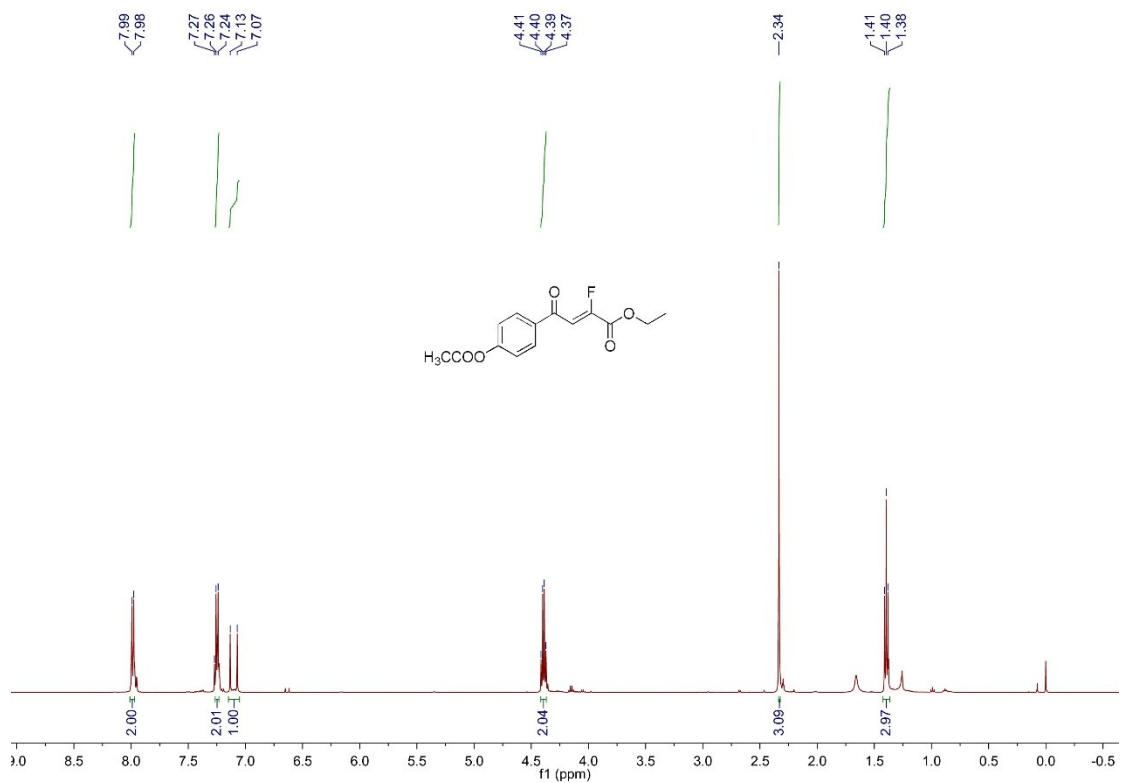

<sup>1</sup>H NMR 4g

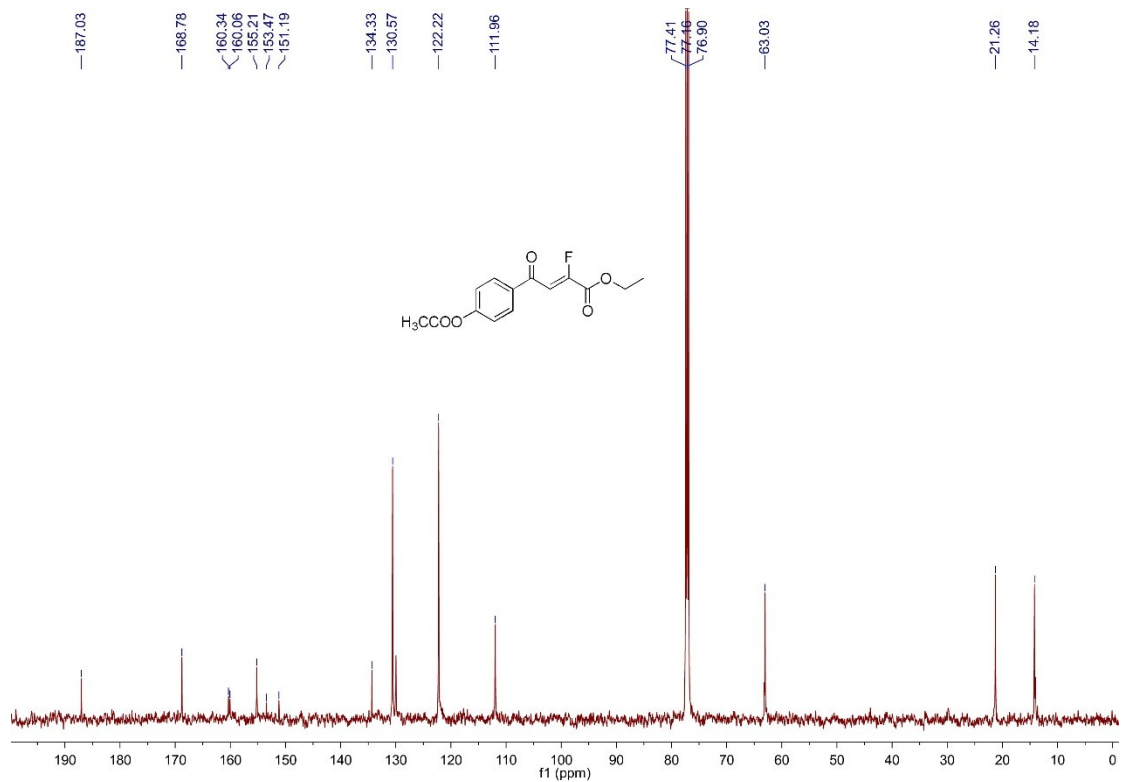

<sup>13</sup>C NMR 4g

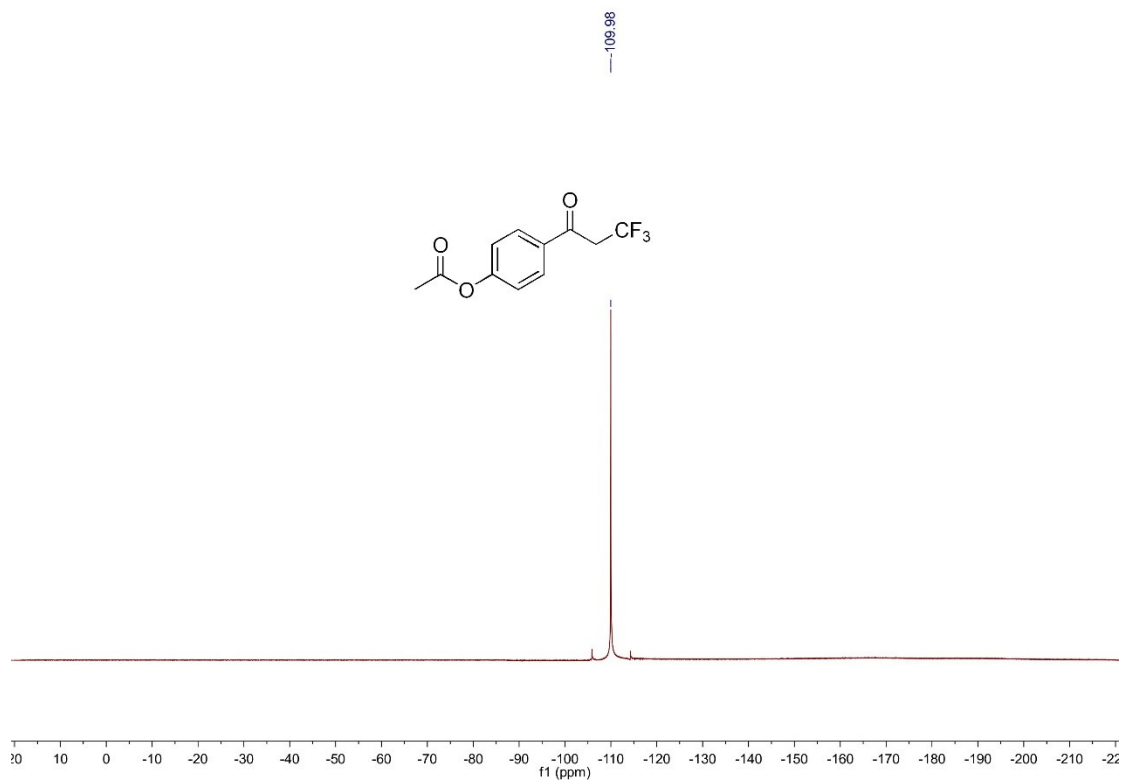

$^{19}\text{F}$  NMR 4g

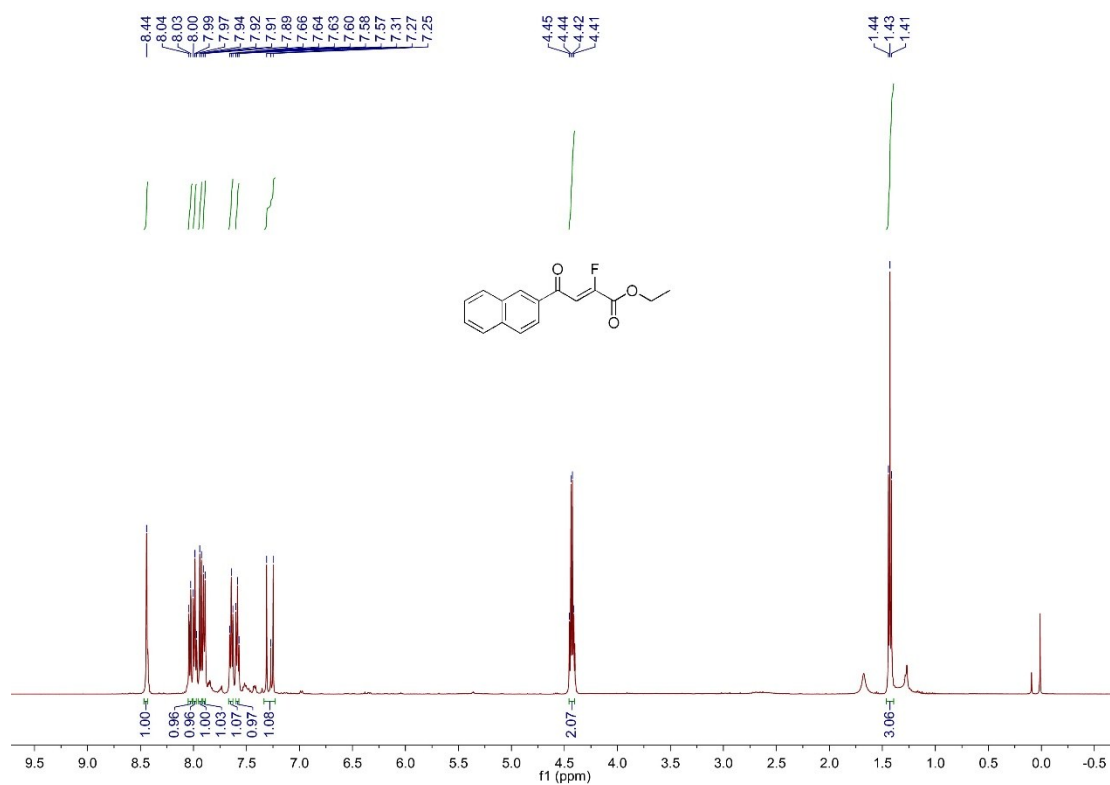

$^1\text{H}$  NMR 4h

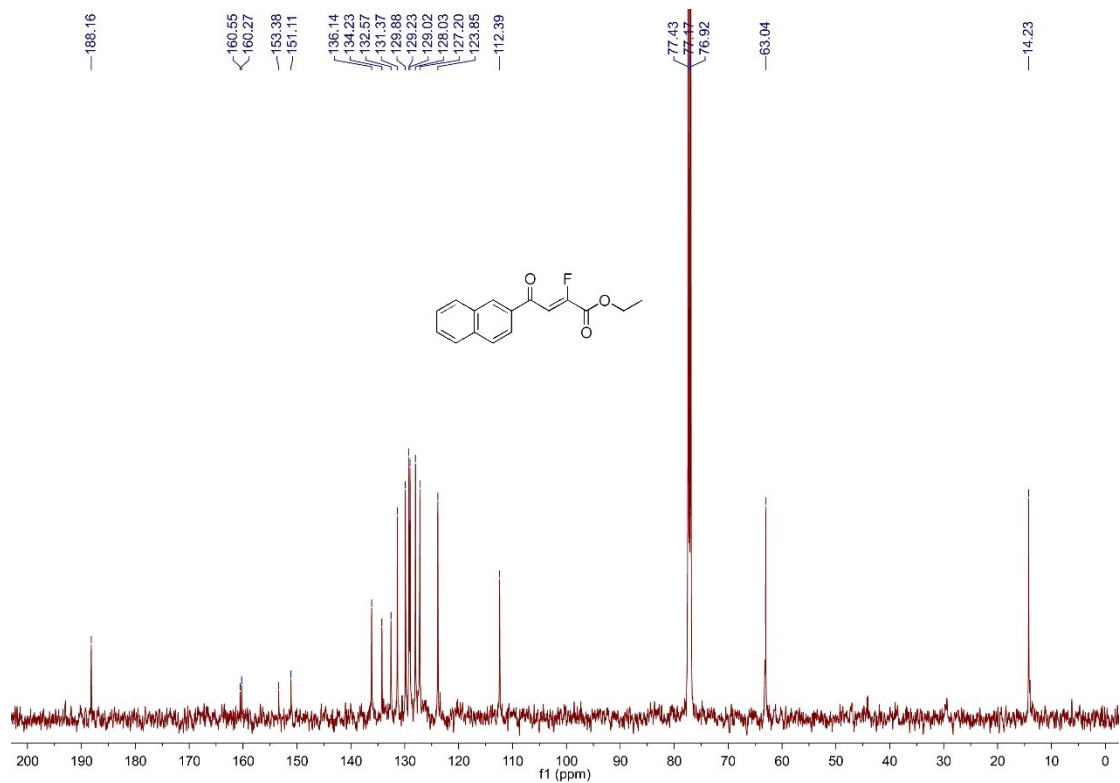

<sup>13</sup>C NMR 4h

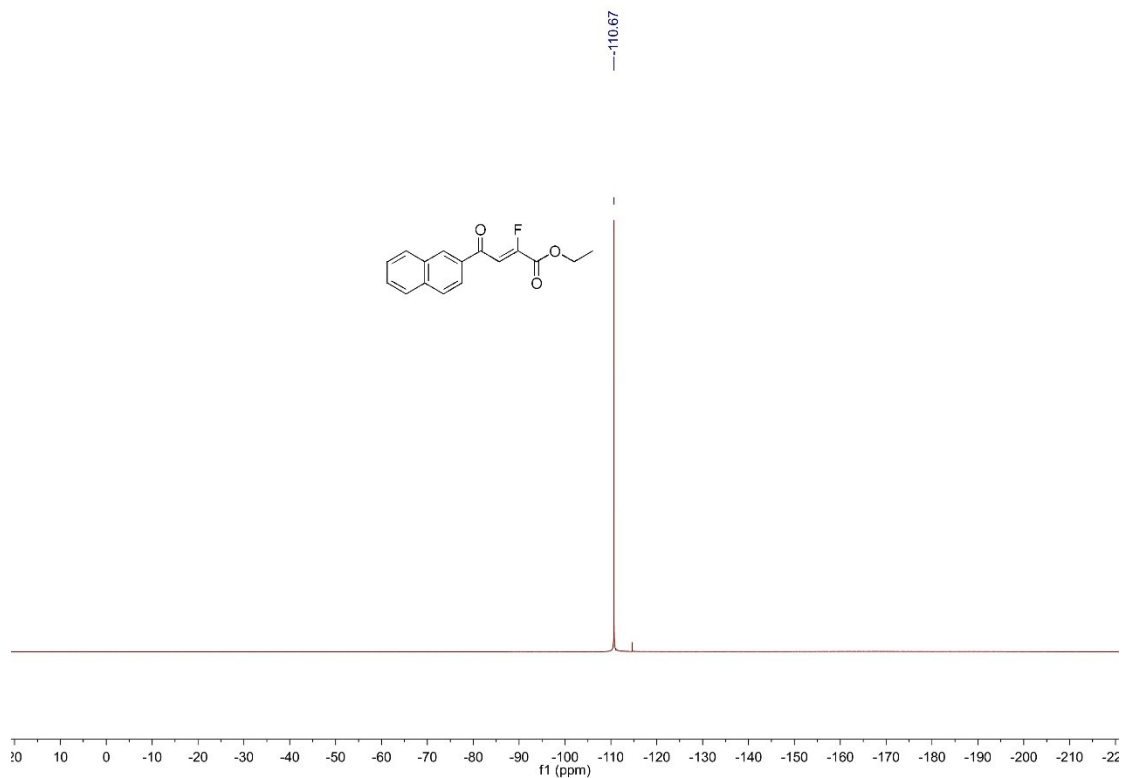

<sup>19</sup>F NMR 4h

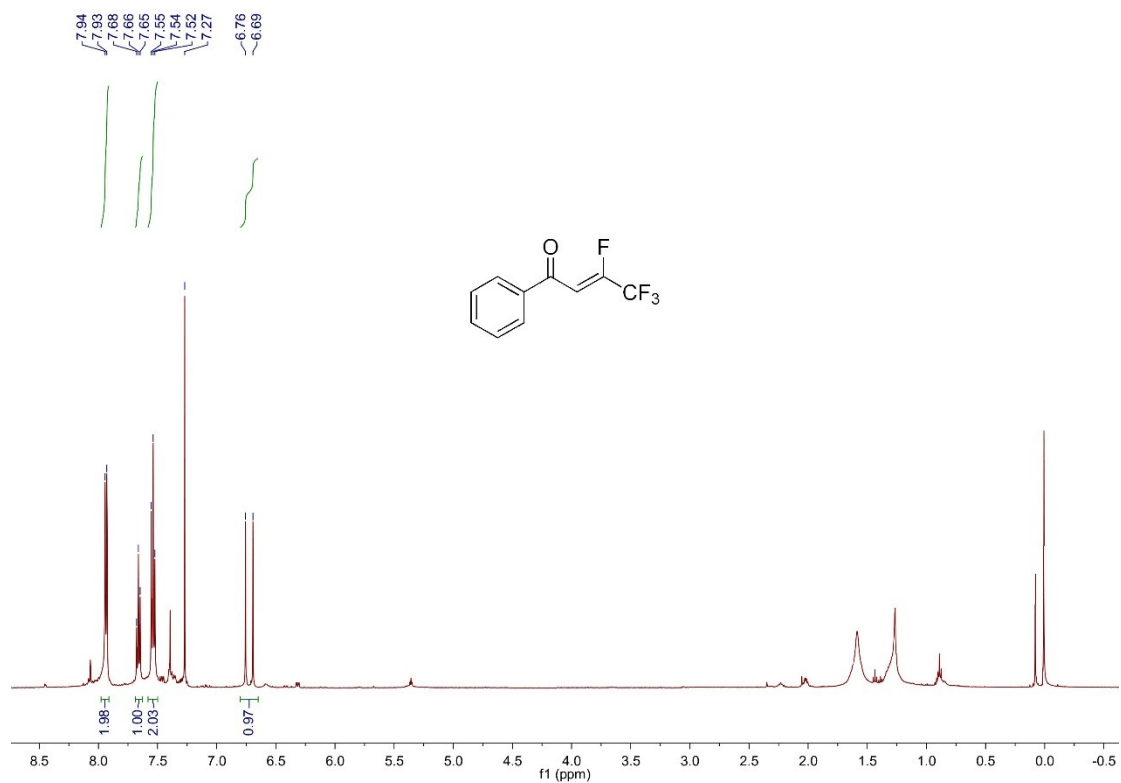

<sup>1</sup>H NMR 5a

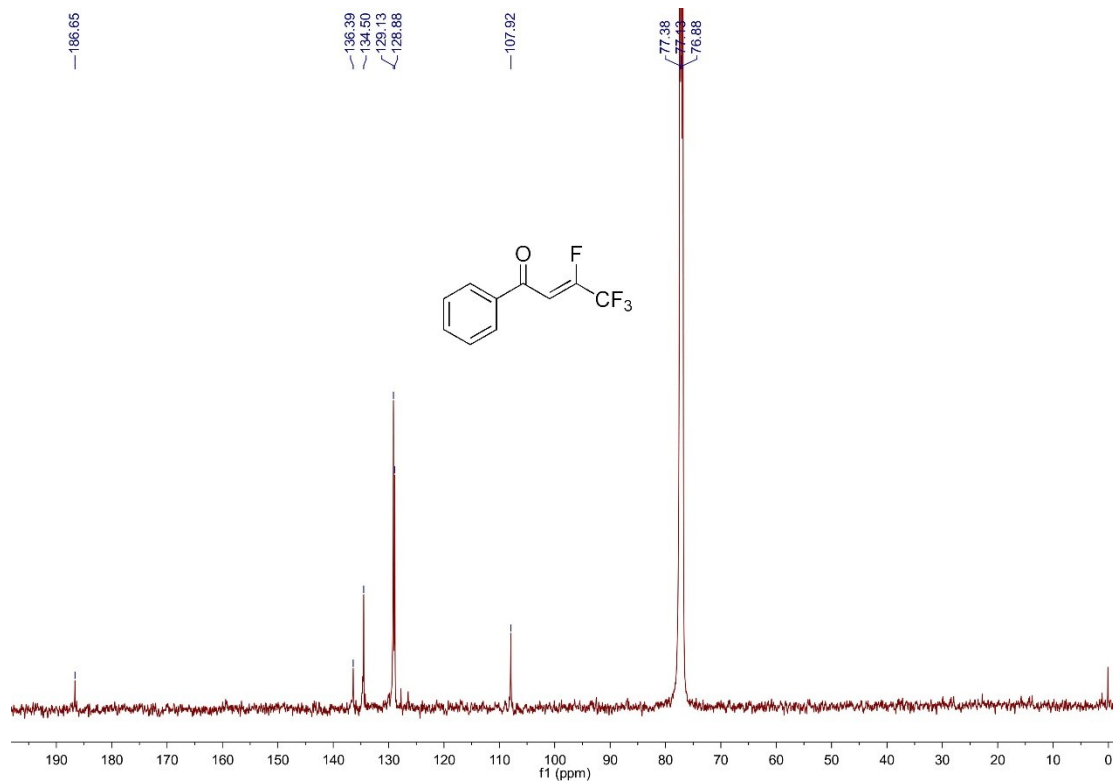

<sup>13</sup>C NMR 5a

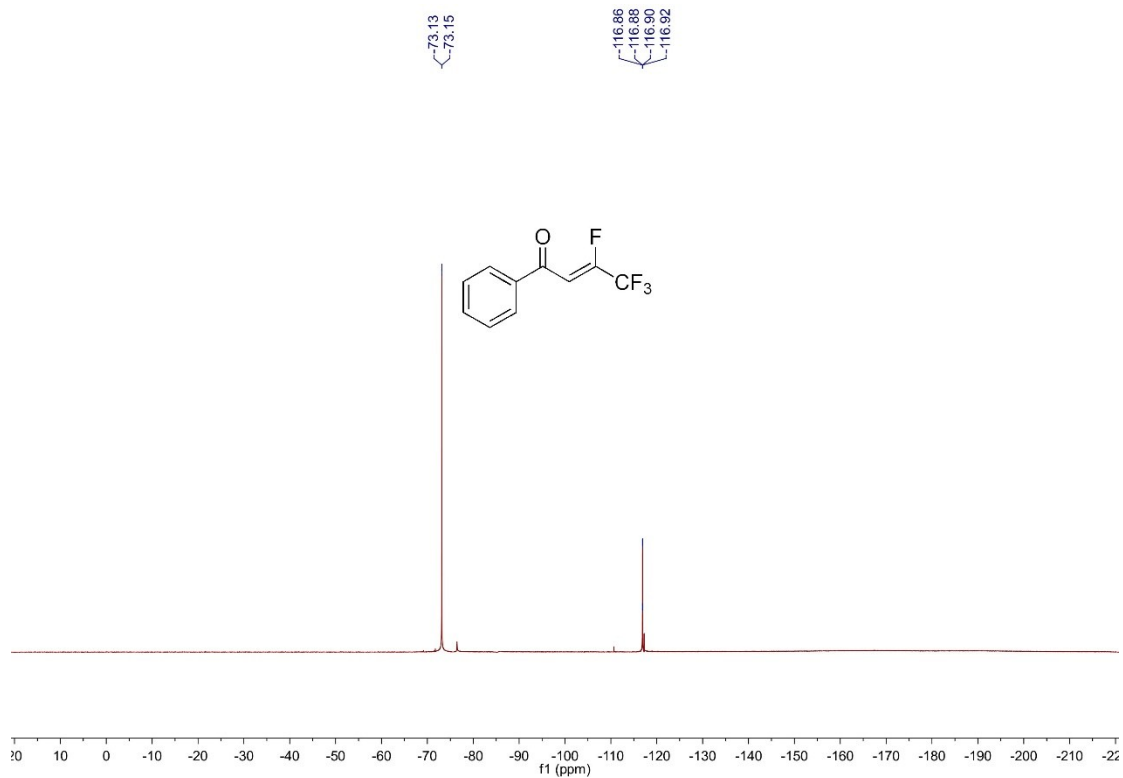

<sup>19</sup>F NMR 5a

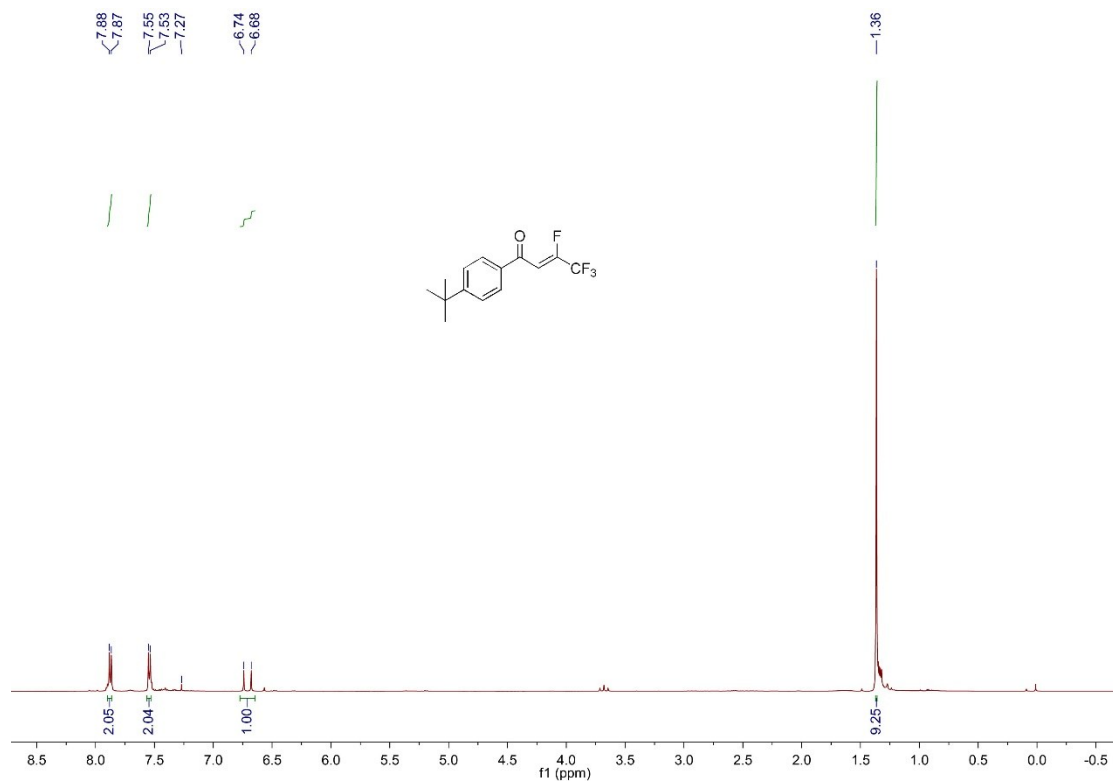

<sup>1</sup>H NMR 5b

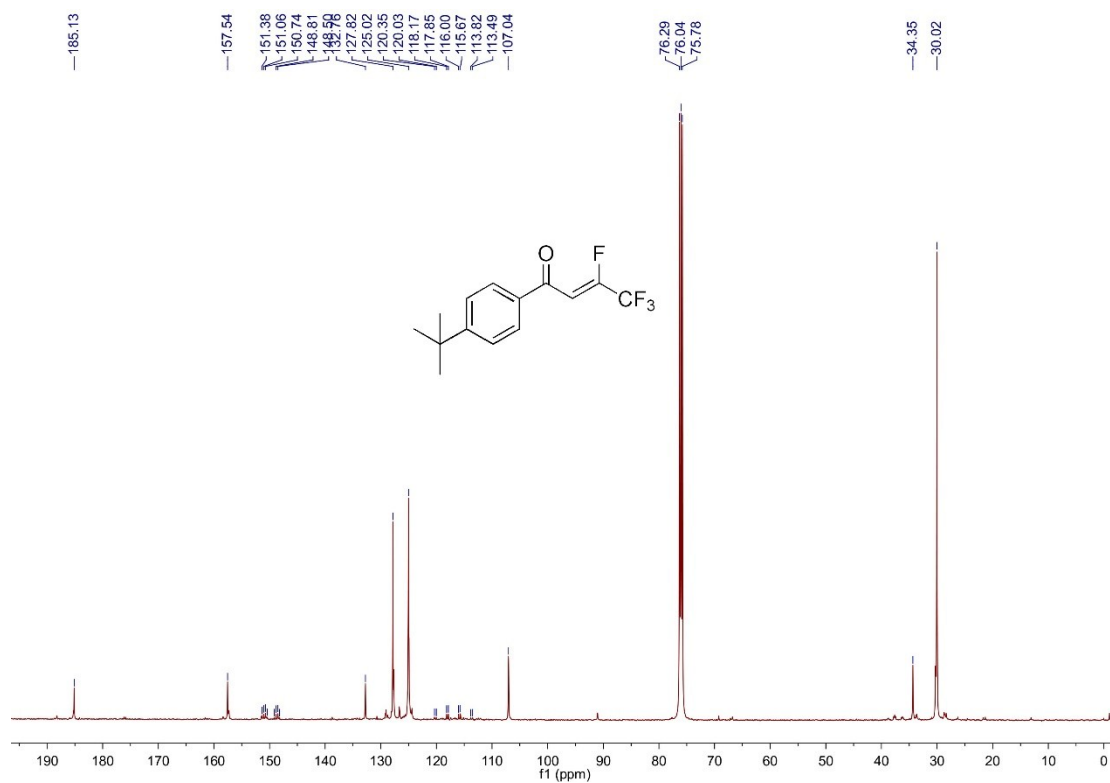

<sup>13</sup>C NMR 5b

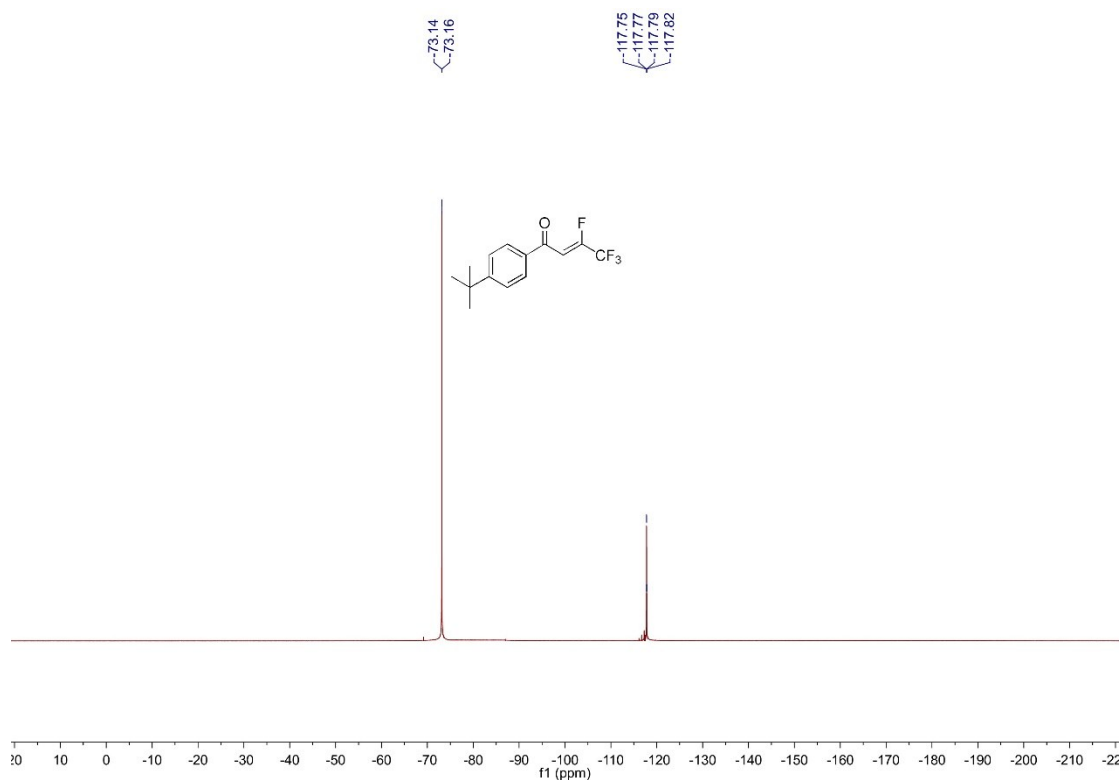

<sup>19</sup>F NMR 5b

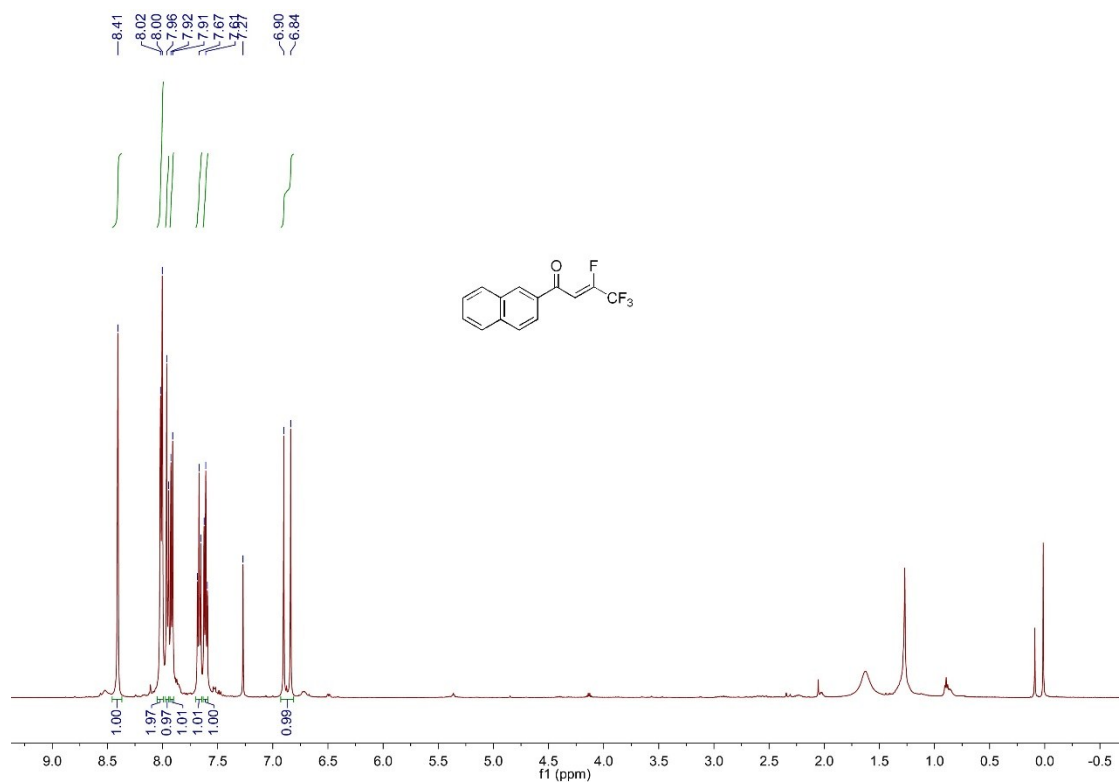

<sup>1</sup>H NMR 5c

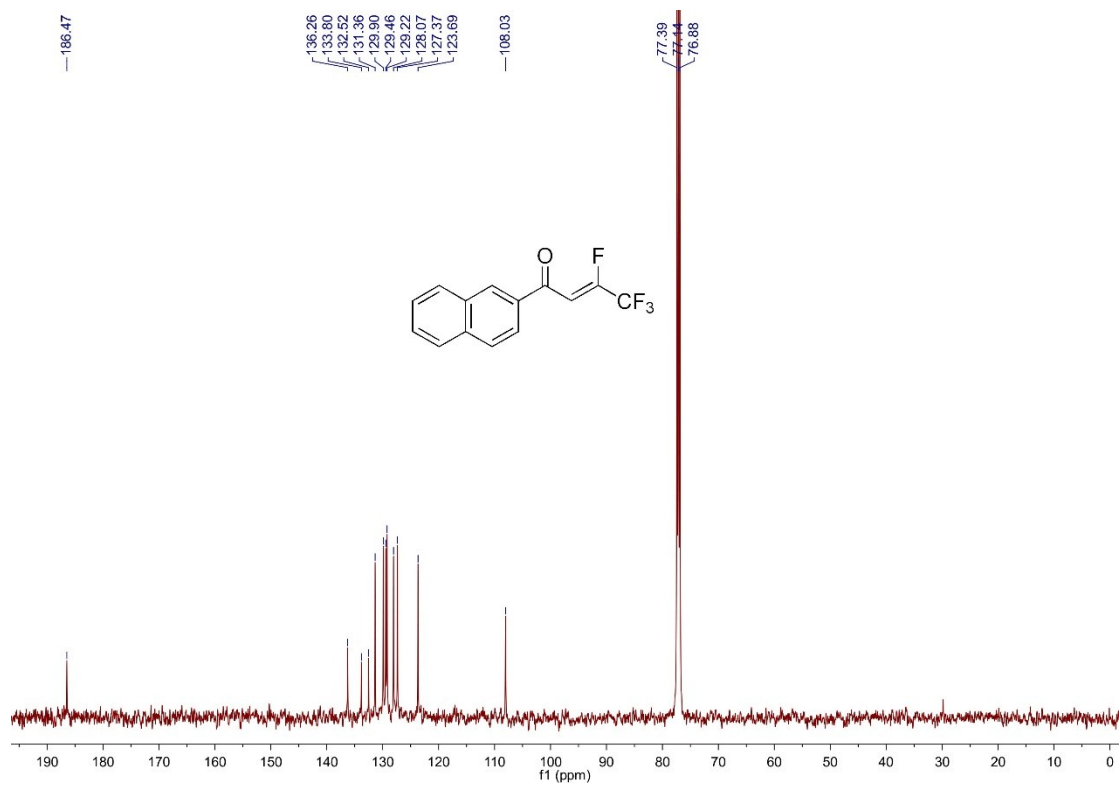

<sup>13</sup>C NMR 5c

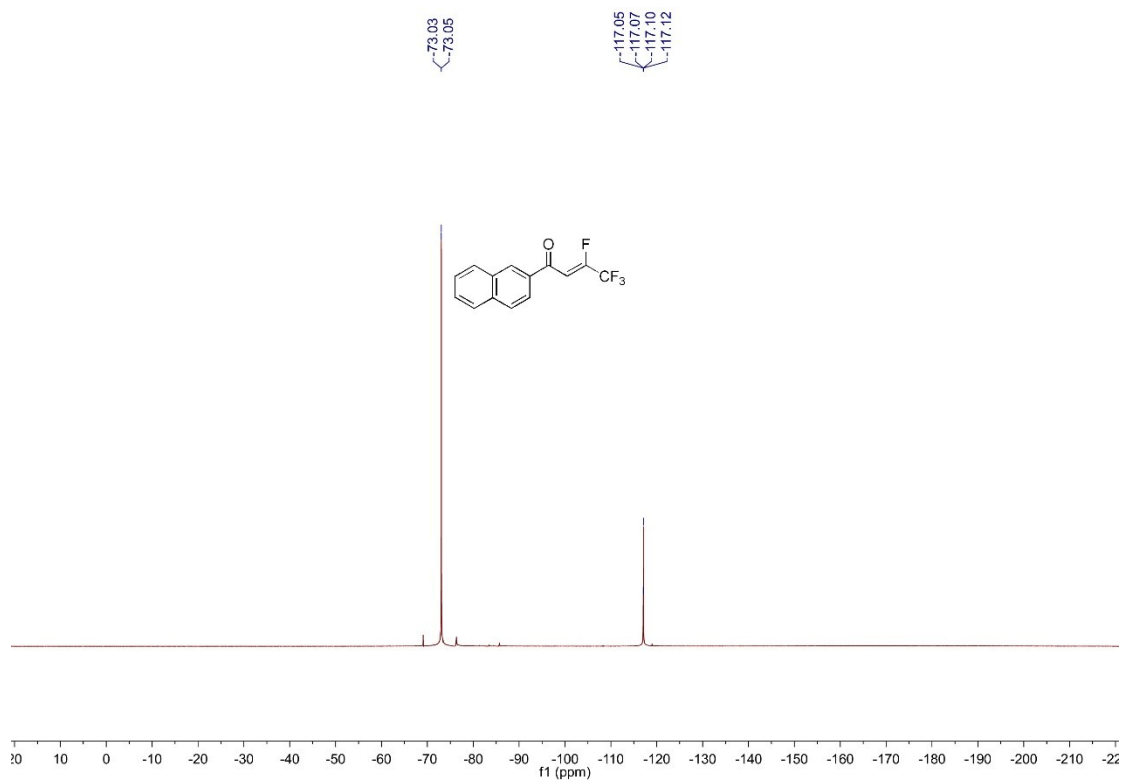

$^{19}\text{F}$  NMR **5c**
